1        **14-3-3 shuttles Activity-dependent neuroprotective protein to the cytoplasm to promote**  
2        **appropriate neuronal morphogenesis, cortical connectivity and calcium signaling.**

3

4 Sarah A. Bennison, Sara M. Blazejewski, Xiaonan Liu and Kazuhito Toyo-oka\*

5

6 Department of Neurobiology and Anatomy, Drexel University College of Medicine

7 Department of Pharmacology and Physiology, Drexel University College of Medicine

8 Philadelphia, PA 19129 USA

9

10 **Corresponding Author\***

11 Kazuhito Toyo-oka, Ph.D.

12 Department of Neurobiology and Anatomy, Drexel University College of Medicine

13 Philadelphia, PA 19129 USA

14 Email: [kt469@drexel.edu](mailto:kt469@drexel.edu)

15 Phone: (215) 991-8288

16 Fax: (215) 843-9082

17

18 **Abbreviated Title**

19 Adnp regulates neurite formation

20

21 **Acknowledgements**

22 We would like to thank Dr. Peter Baas, Dr. Wen-Jun Gao, Dr. Elias Spiliotis, Dr. Pat Levitt and

23 Dr. Illana Gozes for their helpful comments, feedback, and fruitful discussions on this

24 manuscript. We also thank Dr. Tomomi Shimogori in Riken Center for Brain Science in Japan  
25 who provided the GRAPHIC vectors.

26 This work has been supported by a research grant from the NINDS (NS096098).

27

## 28 **Competing Interests**

29 There is no conflict of interest.

## 30 **Abstract**

31           Neurite formation is the earliest stage of neuronal morphogenesis, where primitive  
32 dendrites and the primitive axon emerge from a spherical neuron and begin to elongate. Defective  
33 neuritogenesis is a contributing pathogenic mechanism behind a variety of neurodevelopmental  
34 disorders. Activity-dependent neuroprotective protein (Adnp) is essential to embryonic and  
35 postnatal brain development, and mutations in *ADNP* are among the most frequent underlying  
36 autism spectrum disorder (ASD). We found that knockdown of Adnp *in vitro* and *in vivo* in mouse  
37 layer 2/3 pyramidal neurons leads to increased neurite initiation and defective neurite elongation,  
38 suggesting that Adnp has distinct roles in each. *In vivo* analysis revealed that deficits begin at P0  
39 and are sustained throughout development, the most notable of which include increased neurite  
40 stabilization, disrupted angle of the apical dendrite, increased basal dendrite number, and increased  
41 axon length. Because small changes in neuronal morphology can have large-scale effects on  
42 neuronal function and connectivity, we performed *ex vivo* calcium imaging to assess spontaneous  
43 function of layer 2/3 pyramidal neurons deficient in Adnp. This revealed that Adnp deficient  
44 neurons had a greater spontaneous calcium influx and a higher proportion of cells firing action  
45 potentials. Next, we utilized GRAPHIC, a novel synaptic tracing technology, to assess  
46 interhemispheric cortical connectivity. We found increased interhemispheric excitatory  
47 connectivity between Adnp deficient layer 2/3 pyramidal neurons. Because Adnp is a  
48 multifunctional protein with both transcription factor and cytoskeletal activity, we performed  
49 localization analysis of Adnp as neurons underwent neurite formation to probe the mechanism of  
50 our morphological defects. We found that Adnp is shuttled from the nucleus to the cytoplasm upon  
51 differentiation and this shuttling can be blocked via application of a global 14-3-3 inhibitor,  
52 difopein. Furthermore, we found that Adnp binds nuclear-cytoplasmic shuttle 14-3-3ε. We

53 conclude that Adnp is shuttled from the nucleus to the cytoplasm by 14-3-3 $\epsilon$ , where it regulates  
54 neuronal morphology, maturation, cortical connectivity, and calcium signaling.

55

56



## 57 **Introduction**

58           Neuritogenesis is a fundamental step of cortical development essential for establishing  
59 correct neuronal morphology, connectivity, and function (1, 2). Immature neurons have a spherical  
60 morphology that upon maturation develops to extend a single axon and multiple dendrites (3-6).  
61 This complex feat is driven by neuronal polarization which causes an initial break in symmetry  
62 within an immature neuron, seamlessly followed by the two stages of neuritogenesis: neurite  
63 initiation followed by neurite elongation (4, 7, 8). Following neuronal polarization, actin  
64 aggregates form the sites of primitive neurites, precursors to the axon and dendrites (4, 9, 10). At  
65 these sites, actin rich filopodia and lamellipodia rapidly extend and retract before being stabilized  
66 by microtubule invasion. Microtubules then drive neurite elongation as primitive neurites are lead  
67 to their appropriate destinations where they differentiate into a single axon and multiple dendrites  
68 (8, 11-14). It is of current interest which proteins are key players in this early developmental  
69 process, particularly those which are causatively mutated in neurodevelopmental disorders.

70           Following neurite formation, dendrites mature and develop intricately branched, complex  
71 structures that form synaptic contacts with neighboring neurons that, when formed correctly, lead  
72 to functional connectivity (1, 2, 15). The sites of the vast majority of excitatory connections are  
73 through dendritic spines, the number, developmental timing, and morphology of which are crucial  
74 to form appropriate functional connections (16, 17). These early steps in cortical development are  
75 essentially integrated and complex, with each stage relying on the fidelity of the others. When one  
76 or more of these stages go awry the result is a variety of neurodevelopmental disorders such as  
77 autism spectrum disorder (ASD), intellectual disability (ID), schizophrenia, and Down syndrome  
78 (8, 18-21). Thorough investigations of dendritic maturation and synaptic connectivity in  
79 connection with the etiology of many neurodevelopmental diseases have been performed, however

80 earlier stages of neuronal morphology such as neuritogenesis have yet to be elucidated. Defective  
81 neuritogenesis has been observed and strongly implicated as a contributing pathogenic factor in  
82 many models of neurodevelopmental diseases, but a mechanistic understanding as to how and why  
83 neurite formation goes awry in disease states is yet to be understood.

84 Activity-dependent neuroprotective protein (*Adnp*) is highly conserved with extremely  
85 diverse functions essential in both the central nervous system and throughout the body (22).  
86 Mutations in *ADNP* are well characterized as some of the most frequent underlying ASD and  
87 intellectual disability (ID) and lead to a neurodevelopmental disorder known as ADNP syndrome  
88 (22, 23). Symptoms of the ADNP syndrome range from moderate to severe and the hallmarks  
89 include ID, ASD, delayed speech and motor development, sleep disorder, and seizures (22-28).  
90 Patients also have disorders of multiple organ systems including the digestive system and heart  
91 abnormalities (23) and may be characterized/diagnosed by early tooth eruption (26). However,  
92 there are currently no approved treatment options for patients with mutations in *ADNP*, rendering  
93 a greater understanding of *ADNP*'s functions during development and mutational etiology of high  
94 importance. Furthermore, deficits in *ADNP* have also been associated with neurodegeneration and  
95 Tau pathology. A recent paper identified somatic mutations in *ADNP* driving Tau-microtubule  
96 dissociation and increased tauopathy (25), in line with early discoveries of tauopathy in an animal  
97 model of *ADNP* deficiency (29).

98 *Adnp* interacts with microtubules to promote polymerization through an 8-amino acid  
99 sequence referred to as "NAP" (22, 29). Treatment of cells in culture with NAP has been shown  
100 to promote or rescue neurite outgrowth (30, 31), enhance microtubule dynamics and Tau-  
101 microtubule association (29, 32, 33), and interact with EB3 to enhance dendritic spine formation  
102 (34, 35). Taken together, these results position *Adnp* as an ideal candidate to regulate neurite

103 formation during development. However, a detailed explanation of *Adnp*'s role in this neuronal  
104 process has yet to be elucidated and an *in vivo* neuritogenesis analysis has yet to be performed.  
105 Failure of neurite outgrowth or degeneration of neurites underlies a variety of neurodevelopmental  
106 disorders many of which share symptomology with ADNP syndrome (8, 20, 21, 23). Rescue of  
107 neurite formation defects, specifically by NAP, has also proved a potentially valuable therapeutic  
108 avenue for a variety of disorders (30, 36). However, the details of *Adnp*'s involvement in neurite  
109 formation *in vivo* and whether defective neurite formation plays a pathogenic role in ADNP  
110 syndrome during this early foundational stage of cortical development has yet to be elucidated.

111 The purpose of this study was to perform a detailed, multi-level analysis of *Adnp*'s  
112 functions in neurite formation. We performed in-depth *in vitro* and *in vivo* analyses of the  
113 consequences of knockdown of *Adnp* in layer 2/3 pyramidal neurons in the somatosensory cortex  
114 on multiple stages of cortical development, with a focus on neuritogenesis. Surprisingly, *Adnp*'s  
115 role in neurite formation is not as clear as previously suggested. We show that knockdown of *Adnp*  
116 in layer 2/3 pyramidal neurons leads to an increase in neurite number, increase in the length of the  
117 axon, but decrease in length of the basal dendrites. A further developmental defect discovered was  
118 disruption of the angle of the apical dendrite, potentially effecting functional connectivity. *Ex vivo*  
119 time-lapse live imaging of neuritogenesis at P0 corroborated our fixed analyses, as well as revealed  
120 further defects involving dilations and swellings of growing neurites and defective growth speed.  
121 We also noted a defect previously reported in the *Adnp* haploinsufficient mouse of decreased  
122 dendritic spine density (34). We further quantified dendritic spine morphology and found that  
123 *Adnp* knockdown neurons had more immature spines. Functionally, we uncovered increased  
124 spontaneous calcium signaling and interhemispheric cortical connectivity in *Adnp* deficient

125 pyramidal neurons through excitatory shaft synapses, potentially negating reported dendritic spine  
126 defects.

127         As previously implied (37, 38), we found that Adnp expression changes in subcellular  
128 localization as primary cortical neurons undergo differentiation from neuronal precursor cells to  
129 mature neurons, beginning exclusively in the nucleus and traveling to the cytoplasm as  
130 development progresses. This suggests that Adnp's role in neuronal morphogenesis may be mainly  
131 due to Adnp's cytoplasmic activities, instead of its other known functions as a transcription factor.  
132 Most importantly, we identified 14-3-3 $\epsilon$  as a candidate molecular shuttle. These studies are the  
133 first to perform such a detailed analysis of the consequences of loss of Adnp on neurite formation  
134 and neuronal morphology, revealing a wealth of knowledge on the ways reduced expression of  
135 Adnp effects such crucial stages of cortical development, and providing new insights into the ways  
136 in which mutations in Adnp may result in pathology.

137

138

139 **Methods**

140 *Mice*

141 C57BL/6 mice were maintained in house, and females and males were used for *in utero*  
142 electroporation (IUE) and primary neuronal culture unless otherwise described. All experimental  
143 procedures were approved by the Institutional Animal Care and Use Committee of Drexel  
144 University. The day of the detection of the vaginal plug was defined as embryonic (E) 0.5.

145

146 *Plasmids*

147 Mouse Adnp cDNA (pENTR223.1-Adnp, BC167195) and mammalian expression vector  
148 (pCMV6-Entry-Adnp-Myc-DDK, MR223066) were purchased from TransOMIC and Origene,  
149 respectively. Mouse Adnp was amplified from pENTR223.1-Adnp using Q5 High Fidelity DNA  
150 Polymerase (NEB) and primers containing 6xHis tag to insert it into the C-terminal region of Adnp,  
151 and the PCR fragment was cloned into pLV-CAG1.1-P2A-mScarlet plasmid, which was created  
152 by inserting P2A-mScarlet fragment into pLV-CAG1.1 plasmid (kind gift from Dr. Masahito  
153 Ikawa in Osaka University, Japan), to create pLV-CAG1.1-Adnp-6xHis-P2A-mScarlet. Adnp  
154 shRNA was designed using the web-based design tools, siRNA Wizard Software (InvivoGen) and  
155 BLOCK-iT RNAi Designer (ThermoFisher Scientific), and oligos were synthesized by IDT. The  
156 annealed oligos were cloned into pSCV2-Venus, mScarlet, and mTagBFP2 plasmids (Hand and  
157 Polleux, 2011, Wachi, et al., 2015). pSCV2-mScarlet and pSCV2-mTagBFP2 were created by  
158 replacing Venus in pSCV2-Venus into mScarlet and mTagBFP2 by PCR. The target sequence was  
159 GAGCCTGTACCGAAGGTTA. Scramble shRNA (ACTACCGTTGTTATAGGTG) was used as  
160 a negative control. shRNA-resistant Adnp was created by PCR using primers in which 6  
161 nucleotides were mutated. The shRNA-resistant Adnp sequence is

162 GAACCAGTTCCCAAGTAA. pEYFP-difopein, 14-3-3 peptide inhibitor, is a kind gift from Dr.  
163 Yi Zhou at Florida State University.

164

### 165 *Antibodies*

166 Primary antibodies used in this studies were as follows: Anti-ADNP (Rabbit, Abm, Y409055),  
167 Anti-ADNP antibody (Mouse, F-5, Santa Cruz Technology, sc-393377), Anti-Sox2 (Goat, Y-17,  
168 Santa Cruz Technology, sc-17320), Anti-type III  $\beta$ -tubulin (Mouse, 2G10, ThermoFisher  
169 Scientific, MA1-118), Anti-MAP2 (Mouse, HM-2, Sigma, M4403), Anti-GAPDH (Mouse,  
170 Proteintech, 60004-1-Ig), Anti-His-tag antibody (mouse, Proteintech, 66005-1-Ig), Anti-HA-tag  
171 antibody (mouse, 12CA5, Roche, 11583816001), Anti-Brn2 antibody (Rabbit, Proteintech, 14596-  
172 1-AP), The following secondary antibodies were used: FITC-conjugated Donkey-anti-Rabbit IgG  
173 (Jackson ImmunoResearch Laboratories, 711-096-152), FITC-conjugated Donkey-anti-Goat IgG  
174 (Jackson ImmunoResearch Laboratories, 705-095-147), TRITC-conjugated Donkey-anti-Mouse  
175 (Jackson ImmunoResearch Laboratories, 715-025-151), Cy5-conjugated Donkey-anti-Mouse  
176 (Jackson ImmunoResearch Laboratories, 715-175-150), and Cy5-conjugated Donkey-anti-Rabbit  
177 (Jackson ImmunoResearch Laboratories, 711-175-152). Fluorescent western blot was performed  
178 using IRDye 680 RD Donkey-anti-mouse (LI-COR, 926-68072).

179

### 180 *Primary Neuron and Neurosphere Culture*

181 Primary cortical neurons were harvested from E15.5 mouse embryonic cortices for mature neuron  
182 culture and E14.5 for neurosphere culture. Briefly, pregnant dams were euthanized using CO<sub>2</sub> and  
183 the embryos were immediately removed and decapitated in ice-cold phosphate-buffered saline.  
184 Using a dissection microscope, cortices were harvested from embryonic brains and placed in

185 phosphate-buffered saline on ice. Cortices were dissociated using 0.01% trypsin and a 1000 $\mu$ L  
186 pipette to mechanically dissociate cortices into a single cell suspension. To inactivate trypsin,  
187 200 $\mu$ L of 50 $\mu$ g/mL bovine serum albumin (BSA) was added. Cells were passed through a filter to  
188 remove excess debris, washed with phosphate-buffered saline and centrifuged for 5 minutes. This  
189 process was repeated twice, and cells were counted. To introduce genetic constructs into neurons,  
190 we placed 3-5 million cells into cuvettes for nucleofection (Amaxa). 10 $\mu$ g of DNA was added per  
191 cuvette. Cells were then plated in Neurobasal media supplemented with B27 for mature neurons  
192 or DMEM/F12 supplemented with 1% bFGF and EGF for neurospheres. For neurospheres, media  
193 was changed every 3 days and cells were kept in culture for 14 days. Mature neurons were re-  
194 plated onto coverglass 48 hours following nucleofection, once the transfection had reached its peak  
195 effect, and were allowed to grow for 48 more hours until neurite elongation had proceeded to  
196 completion.

197

#### 198 *Histology and Immunofluorescence Staining*

199 To analyze Adnp expression, brains were dissected at postnatal day (P)15 and fixed with 4%  
200 paraformaldehyde/Phosphate-buffered saline overnight at 4°C. Fixed samples were cryo-protected  
201 by addition of 25% sucrose/Phosphate-buffered saline for 48 hours at 4°C. Samples were  
202 embedded with O.C.T. compound (Sakura) and stored at -80°C. Cryo-sectioning (60  $\mu$ m thickness)  
203 was performed by cryostat (Micron HM505 N) and slices were air-dried. Sections were rinsed  
204 three times in Tris-buffered saline and treated with 0.2% Triton X-100/Tris-buffered saline for 10  
205 minutes at room temperature, followed by blocking for 30 minutes in 5% Bovine serum  
206 albumin/Phosphate-buffered saline supplemented with 0.25% Tween-20 to prevent nonspecific  
207 binding. Primary antibodies were diluted in blocking buffer, and sections were incubated in

208 primary antibody overnight at 4°C. Secondary antibodies were diluted with blocking buffer and  
209 sections were incubated for 30 minutes at room temperature. Sections were stained with 40,6-  
210 Diamidino-2-phenylindole, Dihydrochloride (DAPI, 600nM) and embedded with 90% glycerol  
211 made with Tris-buffered saline. To validate layer targeting of IUE, brains were dissected at P15  
212 and underwent the same staining protocol.

213  
214 Neurospheres were stained as described with a few modifications (39). Briefly, neurospheres were  
215 cultured for 14 days and transferred to a 15 mL tube by a 1000 $\mu$ L pipette. Spheres were allowed  
216 to settle to the bottom of the tube by gravity for 5 minutes before media was removed and spheres  
217 were washed with phosphate-buffered saline. This was repeated 3 times before treating with 4%  
218 paraformaldehyde/Phosphate-buffered saline for 20 minutes. Neurospheres were then stained  
219 using the same protocol for brains but remained free-floating in the 15 mL tube. Finally,  
220 neurospheres were stained with 40,6-Diamidino-2-phenylindole, Dihydrochloride (DAPI, 600nM)  
221 and embedded with 90% glycerol made with Tris-buffered saline.

222  
223 Primary neurons for imaging were grown on glass coverslips for imaging. At the time of fixation,  
224 neurons were washed three times with phosphate-buffered saline and treated with 4%  
225 paraformaldehyde/Phosphate-buffered saline for ten minutes. Cells were immunofluorescently  
226 stained using the same protocol for brain slice and neurosphere staining.

227  
228 All imaging was performed using a confocal microscope (Leica SP8).

229  
230 *In Utero Electroporation (IUE)*



231 E15.5 pregnant mice were used for IUE as previously described (8, 40, 41). Briefly, under  
232 anesthesia, the uterine horn was exposed and 1-2 $\mu$ l of plasmids (1 $\mu$ g/ $\mu$ l) was injected into the  
233 lateral ventricle by pulled-glass micropipette. Then, electric pulses (three pulses of 32V) were  
234 given by the tweezers-type electrodes over the uterine muscle using CUY21 electroporator (Nepa  
235 GENE). The uterine horn was returned into the abdomen, and brain samples were collected at P0,  
236 P3 and P15 for analysis.

237

### 238 *Analysis of Neuronal Morphology*

239 *In vitro* and *in vivo*, neurites were classified as cell protrusions from the cell soma greater than  
240 5 $\mu$ m long. To analyze neuronal morphology *in vivo*, brains were dissected at P3 or P15 and fixed  
241 with paraformaldehyde/Phosphate-buffered saline overnight at 4°C. Fixed samples were processed  
242 as described above. Cryo-sections (60  $\mu$ m thickness) were cut and stained by DAPI. Imaging was  
243 performed using a confocal microscope (SP8 Leica). All image analysis was performed using Fiji  
244 software. To analyze the angle at which the apical dendrite extended with respect to the cortical  
245 plate, a 90° angle was drawn from the center of the cell soma to the cortical plate using the angle  
246 tool. Then, an angle was drawn to the center of the apical dendrite and measured. Polar histograms  
247 were generated using MATLAB and depict the angles at which the apical dendrites extended with  
248 respect to the cortical plate. The average deviation from the expected 90° was also measured and  
249 compared. Number of basal dendrites were counted, and the length of basal and apical dendrites  
250 were measured using Fiji. Sholl analysis was performed using the Sholl Analysis Plugin (Gosh  
251 Lab, UCSD) for Fiji following the developer instructions. To measure axon length *in vivo*, the  
252 length of the axon bundle across the midline was measured using ten brain slices per group of the  
253 same brain area. Dendritic spines were characterized based on geometric characteristics previously

254 defined (42). Spines longer than 2 $\mu$ m were classified as filopodia, spines between 1 and 2 $\mu$ m long  
255 were classified as long thin, and spines shorter than 1 $\mu$ m were classified as thin. Stubby spines  
256 were classified if the length to width ratio was less than 1. Mushroom spines were classified if the  
257 spine head width was greater than 0.6 $\mu$ m. Spines with two heads were classified as branched.  
258 Standard deviation projection images from z-projection photos produced from z-stack data were  
259 used for analysis.

260

### 261 *Fluorescence Analysis*

262 All fluorescence quantification was performed using Fiji and a modified protocol from the  
263 Queensland Brain Institute imaging facility (43). Briefly, all fluorescence values are corrected for  
264 background contribution and for the area of the cell, to prevent confounds such as larger cells  
265 intrinsically having a greater fluorescence intensity value. For each cell, 3 background  
266 measurements were taken surrounding the cell. Those measurements were averaged for use in  
267 future calculations. A region of interest (ROI) was traced around either the whole cell or different  
268 cellular compartments depending on the analysis, and the measurement tool in Fiji was used to  
269 extract following measurements: integrated fluorescence density of ROI, area of ROI, and  
270 background fluorescence. The following calculation was used to perform the appropriate  
271 corrections and obtain the final “corrected fluorescence” value used for analysis and reported in  
272 figures: corrected fluorescence = integrated fluorescence density of ROI – (area of ROI x mean  
273 fluorescence of background readings).

274

### 275 *Ex Vivo Live Imaging*

276 Brain slice preparation and time-lapse live imaging on brain slices were performed as previously  
277 described (8, 40). Briefly, P0 brains were removed and placed in ice-cold artificial cerebrospinal  
278 fluid (CSF). Brains were embedded in 4% low-melting agarose and slices were cut with a 300 $\mu$ m  
279 thickness in ice cold artificial CSF using a VTS1000 vibratome (Leica). Slices were incubated in  
280 D-MEM/F-12 imaging media without phenol red supplemented with 10% FBS for at least 1h at  
281 37 °C, 5% CO<sub>2</sub> for recovery. Slices were transferred to a 35mm dish and submerged in neutralized  
282 rat tail collagen I (Life Technologies). Collagen solidified for 30 min at 37 °C, 5% CO<sub>2</sub>. Slices  
283 were then covered with imaging media. Time-lapse live imaging was performed using an upright  
284 confocal laser scanning microscope (TCS SP2 VIS/405, Leica) with a 20X HCX APO L water-  
285 dipping objective (NA 0.5). During imaging, slices were cultured in the imaging media and kept  
286 at 37 °C with 95% air/5% CO<sub>2</sub> in a stage top chamber incubator (DH-40iL, Warner Instruments).  
287 Confocal Z-stack images were taken every 10min for more than 10 hours.

288

### 289 *Calcium Imaging*

290 Mice underwent IUE at E15.5 and brain slice preparation was performed as described for *ex vivo*  
291 live imaging with a few modifications using brains of 2-month-old female mice. Slices were  
292 incubated in D-MEM/F-12 imaging media without phenol red supplemented with 10% FBS for at  
293 least 20 minutes at 37 °C, 5% CO<sub>2</sub> for recovery. Slices were transferred into glass-bottom 35mm  
294 dishes (MatTek) for imaging. A membrane was placed on top of the slices to reduce movement  
295 during imaging. Time-lapse live imaging was performed using an inverted fluorescent microscope  
296 (Zeiss, Axio Observer Z1) with a 20x objective. Images were captured using Camera Streaming  
297 mode set to 1500 cycles, allowing a frame to be taken approximately every 30 ms for 1 minute  
298 with 4x4 binning while the slices were maintained at 37°C with a stage top incubator (Zeiss).

299

300 All cells included in the analysis were double-positive for GCaMP6s and either Adnp-shRNA-  
301 mScarlet or Scramble-shRNA-mScarlet. Image analysis was performed using Zen 2 Pro analysis  
302 software (Zeiss 2011). Circular regions of interest were placed on the cell soma. Baseline  
303 fluorescence ( $F_0$ ) was obtained by averaging the fluorescence intensity inside the region of interest  
304 throughout the time course imaging. Fluorescence intensity for the time course was measured by  
305 averaging all pixels in the region of interest at each frame of the imaging ( $F_{\text{measured}}$ ). Percent  
306 change in fluorescence ( $\Delta F/F_0$ ) was calculated as  $(F_{\text{measured}} - F_0) / F_0 \times 100$  for every frame of  
307 the time course (44).

308

### 309 *GRAPHIC*

310 IUE was performed to inject two complementary GRAPHIC plasmids (pCAGGS-nGRAPHIC-  
311 2A-H2B-mCherry and pCAGGS-cGRAPHIC-T2A-mCherry) and Adnp-shRNA-mTagBFP2 or  
312 Scramble-shRNA-mTagBFP2 into the right and left lateral ventricles, respectively, of E15.5  
313 embryos. Transfected cells in the right hemisphere are H2B+, BFP2+ and have GFP puncta where  
314 contacts are formed from the opposing hemisphere; the left hemisphere has cells transfected with  
315 mCherry, BFP2, and have GFP puncta where contacts are formed from the opposing hemisphere.  
316 Embryos developed until P30 when female brains were harvested, cryopreserved, sectioned and  
317 imaged as described in the histology methods section. Only mCherry+ and BFP2+ cells were used  
318 for analysis, and only GFP puncta co-localized with dendrites were counted.

319

### 320 *Pull-down*

321 COS-1 cells were transfected with either 6xHis-Adnp + HAHA or 6xHis-Adnp + HAHA-14-3-3ε  
322 and grown to confluency on 10cm dishes. Cells were collected and pull-down was performed using  
323 ant-HA antibody-coated beads (HA-probe (F-70), Santa Crus Biotechnology, sc-7392). Following  
324 pull-down, western blot was performed using anti-His antibody to detect 6xHis-Adnp. Also, for  
325 input, whole protein lysates before performing the pull-down were used to detect 6xHis-Adnp and  
326 HAHA-14-3-3ε.

327

### 328 *Statistical Analysis*

329 The experimenter was blinded during all data acquisition and analysis. All experiments have  
330 biological and technical replicates that include performing three experiments and plating  
331 duplicates per condition for culture experiments. For IUE, at least 3 brains from two litters were  
332 analyzed. Quantitative data were subjected to statistical analysis using SPSS (IBM Analytics) and  
333 MATLAB (MathWorks). Data were tested for normality using Shapiro-Wilk's test with a cut-off  
334 of  $p < 0.05$ . Outliers were removed if their z-score fell outside  $\pm 2.5$  from the mean. The data were  
335 analyzed by two-tailed independent-samples t-tests, one-way or two-way ANOVAs with post-hoc  
336 test if needed, and chi-squared tests where appropriate. Results from parametric tests were  
337 considered significant if  $p < 0.05$ . All data are presented as mean  $\pm$  standard error of the mean.  
338 Significance is reported on figures as follows: \* $p < 0.05$ , \*\* $p < 0.01$ , \*\*\* $p < 0.001$ .

339

340 **Results**

341 *Adnp knockdown disrupts cortical neuritogenesis in vitro.*

342

343 Previous studies have shown that knockdown of Adnp leads to a decrease in MAP2  
344 fluorescence intensity in a differentiated embryonic carcinoma cell line, P19 cells, suggesting  
345 decreased neurite formation (37). Another study has shown that treating primary cortical neurons  
346 with NAP increases neurite formation (31). Taken together, these studies implicate Adnp as an  
347 important regulator of neurite formation. However, Adnp has differing roles based on both cell-  
348 type and developmental timing. Therefore, it is crucial to perform a direct analysis of how Adnp  
349 knockdown effects neuritogenesis in cortical neurons. Before moving to our neuronal cell model,  
350 we confirmed that Adnp is expressed in primary cortical neurons using immunofluorescence  
351 staining (Fig. 1A). We found that Adnp is expressed in both the cell body and along developing  
352 neurites (Fig. 1B), with increased concentration in the perinuclear region and at the base of  
353 growing neurites. We also confirmed that Adnp is expressed throughout the mouse cortex at P15  
354 and its expression is predominantly in the cytoplasm (Fig. 1C-D), as implied by previous work  
355 (37, 38, 45). We harvested primary cortical neurons from E15.5 mouse embryos and introduced  
356 Adnp short hairpin RNA (shRNA) or scramble shRNA with a Venus fluorophore via  
357 nucleofection. We designed Adnp shRNA not to target any other known sequence in the mouse  
358 genome and found it to be >97% efficient at knockdown of Adnp validated by Western blot and  
359 by immunofluorescence staining (Supplemental Fig. 1A-D). Scramble shRNA was used as a  
360 control and does not target any known sequence in the mouse genome, shares a backbone vector  
361 with Adnp shRNA, and was validated by Western blot and immunofluorescence staining of Adnp  
362 (Supplemental Fig. 1 A-D).

363           In primary cortical neurons, we found that Adnp knockdown leads to a significant increase  
364 in length of the longest neurite, the neurite most likely to become the axon (Fig. 2A-B) (46), and  
365 no significant effect on length of the remaining neurites (Supplemental Fig. 2). Furthermore, we  
366 found a significant increase in neurite number in Adnp knockdown neurons (Fig. 2A and C). These  
367 results suggest that Adnp negatively regulates neurite initiation in the neurites likely to become  
368 dendrites, and negatively regulates neurite elongation in the neurite likely to become the axon.  
369 Defects were rescued by restoring Adnp expression in Adnp deficient cells (Fig. 2A-C). Rescue  
370 experiments were conducted using an shRNA resistant Adnp expression vector (“Adnp OE”) in  
371 combination with Adnp shRNA to restore Adnp expression. The control for our rescue was co-  
372 transfection of the resistant backbone vector (“control OE”) with scramble shRNA. These vectors  
373 were validated using western blot (Supplemental Fig. 1E). The rescue cells did not significantly  
374 differ from either the rescue control or shRNA scramble on measures of neurite number and length  
375 of the longest neurite, confirming that these defects were from loss of Adnp and not from off-target  
376 effects of the shRNA (Fig. 2A-C). Sholl analysis of neurite branching corroborated our neurite  
377 formation analysis, with increased intersections proximally in Adnp deficient neurons, indicating  
378 increased neurite initiation, and increased intersections distally by an average of 1 intersection,  
379 indicating increased elongation of a single neurite (Fig. 2D).

380

381 *Adnp knockdown disrupts cortical neuritogenesis in vivo.*

382

383           We confirmed these results *in vivo* using IUE to knock down Adnp at E15.5 in neurons  
384 that migrate and mature into layer 2/3 pyramidal neurons in the somatosensory cortex  
385 (Supplemental Fig. 3) (47). We analyzed dendritic morphology including apical and basal dendrite

386 length and number at P15, after neuritogenesis has proceeded to completion, roughly equivalent  
387 to our *in vitro* analysis (Fig. 3). These results were consistent with our *in vitro* analysis in that there  
388 was an increase in basal dendritic number on *Adnp* deficient neurons (Fig 3A-B), whereas *in vitro*  
389 there was an increase of neurite number (Fig. 2C). However, there was an additional deficit noted  
390 *in vivo* of decreased basal dendrite length on *Adnp* deficient neurons (Fig 3A and C). Both of these  
391 defects were rescued by restoring *Adnp* expression (Fig. 3A-C). Apical dendrite length was not  
392 affected (Supplemental Fig. 4).

393         Next, we assessed axon length at P15, after axons have crossed the midline and traveled to  
394 their final destinations and integrated into their appropriate cortical circuits. We cut coronal brain  
395 slices of the electroporated area and traced the axon bundle from the midline to its termination,  
396 which was defined as no measurable Venus fluorescence. There was no difference in density of  
397 axons crossing the midline as measured by width of the midline bundle in *Adnp* shRNA compared  
398 to control (Fig. 4A-C). This suggests that there is no difference in number of neurons sending their  
399 axons to the contralateral hemisphere. We found an increase in length of the axon bundle after  
400 crossing the midline in *Adnp* deficient neurons, again confirming the phenotype observed *in vitro*  
401 (Fig. 4A, B, D-F). We also observed increased innervation throughout the entire opposing cortex  
402 from axons deficient in *Adnp* compared to control (Fig. 4G-H).

403

#### 404 *Adnp* knockdown in vivo disrupts apical dendrite orientation.

405

406         At early postnatal stages, cortical neurons have a relatively immature morphology  
407 characterized by a single apical dendrite extended at roughly a 90° angle with respect to the cortical  
408 plate (Fig. 5A). The angle of the apical dendrite at this stage influences both neuronal function and



409 synaptic connectivity as neural networks and initial synaptic contacts are forming (48). Analysis  
410 of *Adnp* deficiency *in vivo* by using IUE at E15.5 and analysis at P3 revealed a defect in the angle  
411 of the apical dendrite. Scramble shRNA cells extended their apical dendrites straight from the  
412 soma to form a roughly 90° angle with the cortical plate, with a tight distribution of angles spanning  
413 from less than -60° to 60° (Fig. 5B). This deviation significantly differed from *Adnp* deficient  
414 neurons which extended apical dendrites at many different angles, often with sharp bends that fell  
415 across a broad distribution from -30° to 30° (Fig. 5C). The angle of the apical dendrite was restored  
416 by rescue of *Adnp* expression using our validated vectors, confirming that *Adnp* signaling is  
417 responsible for this defect (Fig. 5D-E). The apical dendrite angle distribution for rescue and rescue  
418 control cells also fell between -60° and 60°, the same as shRNA scramble cells. We calculated the  
419 average deviation from the expected 90° across groups and found that *Adnp* deficient neurons  
420 indeed had a significantly greater deviation compared to Scramble shRNA, rescue, and rescue  
421 control groups (Fig. 5F). Furthermore, we found that apical dendrites present on knockdown  
422 neurons were significantly wider with respect to the soma compared to controls (Fig. 5G). These  
423 results further reveal *Adnp*'s complex involvement in establishing neuronal morphology and  
424 potentially network connectivity. We found that these deficits are sustained throughout P15 and  
425 were also rescued due to restoration of *Adnp* expression in *Adnp* deficient cells (Supplemental  
426 Fig. 5).

427

428 *Ex vivo time-lapse live imaging reveals disruption of neuritogenesis dynamics in *Adnp* deficient*  
429 *neurons.*

430

431 To pinpoint when the primary morphological deficits develop for *Adnp* deficient neurons,  
432 as defects at one stage effect all other stages, we observed cortical sections as neurons completed  
433 neurogenesis at E17.5 (Supplementary Fig. 6A) and were migrating at E18.5 (Supplementary Fig.  
434 6B) and we found no differences in cortical positioning. At our apical dendrite analysis at P3, all  
435 neurons had arrived at their correct positions in the cortical plate, suggesting no defects in neuronal  
436 migration (Supplementary Fig. 6C). Defects occurring at the onset of neuritogenesis, at P0, likely  
437 underlie our observed later deficits at P3 and P15 in axo- and dendritogenesis. To investigate the  
438 highly dynamic process of neuritogenesis in more detail, we performed *ex vivo* time-lapse live  
439 imaging on living brain slices harvested from P0 cortices of mice that had undergone IUE at E15.5  
440 to introduce either *Adnp* shRNA or scramble shRNA. At P0, layer 2/3 neurons have terminated  
441 migration and settled in the cortical plate where they are just beginning neurite initiation. Time-  
442 lapse live imaging allowed us to detect many interesting flaws in *Adnp* deficient neurons compared  
443 to control as neuritogenesis occurred that the use of fixed samples did not (Fig 6, Supplemental  
444 movies 1 and 2). Scramble shRNA neurons were highly dynamic, displaying rapid changes in  
445 morphology with extension and retraction of filopodia and lamellipodia which were eventually  
446 stabilized and then elongated (Fig. 6A-B, Supplemental Video 1). *Adnp* shRNA neurons had on  
447 average one primary neurite at the beginning of imaging that was already significantly longer than  
448 the primary neurites present on control cells (Fig. 6A-B, Supplemental Video 2). As imaging  
449 progressed, instead of the rapid formation and retraction of primitive neurites, the primary neurite  
450 on *Adnp* deficient neurons either remained stable or slowly grew with reduced maximum growth  
451 and retraction velocity (Fig 6C-E), resulting in a significantly shorter length of growth throughout  
452 the video compared to scramble shRNA (Fig. 6F). This slow yet consistent growth of a single  
453 neurite, as opposed to rapid shrinkage and growth seen in controls, likely explains the eventual

454 increase in axon length *in vitro* and *in vivo* Adnp deficient neurons. These results suggest that  
455 Adnp shRNA neurons have defects in the dynamics necessary to produce appropriate neurite  
456 elongation.

457 Scramble shRNA cells on average had significantly more neurites emerge throughout the  
458 10 hour time span than Adnp shRNA cells (Fig. 6G) yet the final number of neurites stabilized  
459 was not significantly different (Fig. 6H), resulting in a ratio of emergence to stabilization being  
460 significantly higher in Adnp shRNA neurons compared to scramble shRNA neurons (Fig. 6I).  
461 These results suggest that Adnp shRNA neurons have issues producing the necessary dynamics of  
462 neurite initiation. Furthermore, Adnp deficient neurons also had a significantly lower neurite  
463 retraction frequency (Fig. 6J). The higher ratio of neurite stabilization and the decreased retraction  
464 frequency suggests that in Adnp deficient cells, each neurite that emerges is more likely to be  
465 stabilized, regardless of the intrinsic properties of that neurite that might not make it a good  
466 candidate for stabilization. This explains the eventual increase in neurite number seen *in vitro* and  
467 *in vivo* in Adnp deficient neurons. Taken together, these results suggest serious flaws in the  
468 necessary dynamics that drive both proper neurite initiation and elongation.

469 A final interesting morphological phenotype revealed by live imaging was neuritic swelling  
470 and appearance of dilations along the length of neurites present on Adnp shRNA neurons, as well  
471 as the width of the primary neurites present on Adnp shRNA neurons (Fig. 6K-N). These swellings  
472 rarely appeared in shRNA scramble neurons. Adnp deficient neurons had significantly more  
473 swellings per frame (Fig. 6L-M), which were defined as outgrowths from the primary neurite  
474 measuring more than one micron that did not mature into branching points, than scramble shRNA  
475 cells. Primary neurites on Adnp deficient cells were also significantly wider compared to controls  
476 (Fig. 6N). This increase in apical dendrite width was sustained at P3 and P15 where it was able to

477 be rescued by restoring Adnp expression in Adnp deficient cells (Fig 5G, Supplemental Fig. 5I).  
478 These results suggest intracellular issues within Adnp deficient neurons, perhaps relating to  
479 transport of organelles large enough to produce these swellings, such as mitochondria and Golgi.

480

481 *Adnp knockdown disrupts properties of dendritic spines in vivo.*

482

483 Next, to assess later stages of neuronal morphogenesis and maturation, we analyzed  
484 dendritic spine density and morphology at P15. A previous study showed a slight, yet significant  
485 decrease in dendritic spine density in the Adnp haploinsufficient mouse (34). We further assessed  
486 dendritic spine morphology using a geometric quantification system (Fig. 7A) (42). We found that  
487 Adnp deficient neurons had a significant decrease in proportion of mushroom type spines, which  
488 are generally considered the most mature and the site of functional synaptic contacts (16), and an  
489 increase of other spine morphologies such as thin (Fig 7B-D). We also confirmed a decrease in  
490 dendritic spine density in our model (Fig. 7E) consistent with the Adnp haploinsufficient mouse  
491 (34). Our results suggest several dendritic spine properties are altered due to loss of Adnp,  
492 potentially effecting synaptic efficiency.

493

494 *Adnp deficient pyramidal neurons show increased spontaneous calcium signaling.*

495

496 Although our dendritic spine analysis suggests that there may be less synaptically  
497 functional spines on Adnp deficient neurons; the increased axon length, innervation to opposing  
498 cortical layers, and basal dendrite numbers in Adnp deficient neurons may actually provide more  
499 surface area for these neurons to form synaptic contacts, negating the effect of the dendritic spines.

500 To directly test how loss of *Adnp* affects neuronal function we performed *ex vivo* calcium imaging.  
501 Mice underwent IUE at E15.5 to introduce either *Adnp* or scramble shRNA tagged with an  
502 mScarlet reporter in combination with the genetically encoded calcium indicator GCaMP6s.  
503 Brains were harvested for imaging experiments at 2 months old and spontaneous calcium activity  
504 was measured (Fig 8A). Circular regions of interest were placed over the cell somas, and average  
505 fluorescence values were extracted at each 30ms time frame. We found that *Adnp* deficient  
506 neurons had significantly greater calcium influx, as measured by percent fluorescence change from  
507 baseline, compared to control (Fig. 8A-B). We also found that a greater percentage of *Adnp*  
508 deficient neurons had influxes of calcium large enough to indicate an action potential compared to  
509 control, although this change was not statistically significant (Fig. 8B-C) (44). These results  
510 suggest that although *Adnp* deficient neurons have altered spine properties, they have increased  
511 spontaneous calcium signaling compared to controls.

512

513 *GRAPHIC reveals increased interhemispheric cortical connectivity and excitatory shaft synapses*  
514 *in Adnp deficient neurons.*

515

516 Increased axon innervation from pyramidal neurons to opposing cortical neuronal  
517 populations was suggested by our axon tracing experiments. Furthermore, our calcium imaging  
518 suggests hyperexcitability of layer 2/3 neurons. To test whether this apparent increase in neuronal  
519 excitability and axon innervation correlated to increased connectivity between layer 2/3 neurons,  
520 we utilized a novel tracing technique, “GPI anchored reconstitution-activated proteins highlight  
521 intercellular contacts” GRAPHIC, which delineates synaptic contacts between neurons using a  
522 GFP reconstitution method (49). GRAPHIC utilizes expression vectors encoding GPI-anchored

523 membrane proteins that display complementary fragments of the GFP protein (49). Therefore, GFP  
524 is specifically reconstituted at the contact area between two cells expressing complementary  
525 plasmids, which has been validated as synapse-specific when transfected into neurons (49) (Fig.  
526 9A). A pair of complementary GRAPHIC plasmids were injected into opposing cortical  
527 hemispheres (Fig. 9B), one with an mCherry reporter and one with an H2B-mCherry reporter, at  
528 E15.5 in combination with either *Adnp* or scramble shRNA containing a mTagBFP2 reporter.  
529 Brains were harvested and mCherry<sup>+</sup>, BFP<sup>+</sup> and GFP puncta<sup>+</sup> neurons were analyzed at P30 (Fig.  
530 9C), when pyramidal cortical neurons are morphologically and synaptically mature (50). *Adnp*  
531 deficient dendrites had significantly more puncta compared to Scramble shRNA dendrites (Fig.  
532 9C-D). We also observed a dramatic, significant increase in shaft puncta in *Adnp* deficient neurons  
533 compared to Scramble shRNA (Fig. 9E). In fact, the percentages of spine vs. shaft puncta were  
534 almost the complete opposite in *Adnp* deficient compared to scramble shRNA dendrites. Taken  
535 together, these results suggest *Adnp* deficient neurons have increased interhemispheric contacts  
536 from excitatory neurons, although the vast majority of these contacts are with the dendritic shaft,  
537 corroborating our calcium imaging.

538

539 *Adnp travels from the nucleus to the cytoplasm as primary cortical neurons undergo*  
540 *differentiation.*

541

542 To probe the mechanism for how *Adnp* may regulate neuritogenesis, we assessed its  
543 expression pattern as primary cortical neurons undergo differentiation and neurite formation. *Adnp*  
544 has differential functions, as a transcription factor in the nucleus and a cytoskeleton-interaction  
545 protein in the cytoplasm, and cell-type-specific expression patterns depending on the

546 developmental stage of the cell (36, 37, 51-53). We were interested in assessing the expression  
547 pattern of Adnp in cortical neurons with a spherical, immature morphology vs. a mature, post-  
548 neurite formation morphology to provide information regarding which of Adnp's roles, nuclear,  
549 cytoplasmic, or both are important for neuronal morphogenesis and maturation. To assess Adnp  
550 subcellular localization of immature neurons we dissected mouse cortices from E14.5 embryos  
551 and cultured them as neurospheres, allowing for the proliferation of neuronal stem cells.  
552 Neurospheres were kept intact and fixed after 14 days in culture, then we performed  
553 immunofluorescence staining (Fig. 10A). We compared neurospheres to primary cortical neurons  
554 harvested from E15.5 embryos plated on PDL and laminin-coated coverslips to encourage  
555 neuritogenesis. Primary cortical neurons were fixed after 48 hours, while in the late stages of  
556 neurite elongation, and immunofluorescently stained (Fig. 10B). We compared the staining  
557 patterns of Adnp in immature vs. mature neurons using three methods. Firstly, we compared the  
558 staining patterns using quantification of Adnp fluorescence intensity based on cellular  
559 compartment in neurospheres (Fig. 10C) and mature neurons (Fig. 10D). Secondly, we compared  
560 the fluorescence profiles of all fluorophores in a representative immature and mature neuron (Fig.  
561 10E-F). Lastly, we compared the ratio of Adnp fluorescence intensity in the nucleus vs. the  
562 cytoplasm of neurospheres and mature neurons (Fig. 10G). These methods all show the same clear  
563 localization differences, that Adnp fluorescence is strongly distributed in the nucleus of immature  
564 neurons but mainly in the cytoplasm of neurons that have undergone neuritogenesis. In mature  
565 neurons, Adnp is most heavily localized to the perinuclear region and at the base of developing  
566 neurites (Fig. 10B). Adnp is still present in the nucleus of mature neurons, but it's clear movement  
567 towards the cytoplasm as cortical neuronal maturation proceeds suggests Adnp may take on roles

568 beyond that of a transcription factor, traveling to the cytoplasm during this specific time point to  
569 promote neuritogenesis.

570

571 *14-3-3 inhibition traps Adnp in the nucleus and Adnp binds 14-3-3ε.*

572

573 Next, we investigated the mechanism for Adnp's nuclear-cytoplasmic shuttling. 14-3-3  
574 proteins are important for development, neurite formation, and are well-known nuclear-  
575 cytoplasmic shuttles (8, 41, 54, 55). We performed *in silico* sequence analysis which revealed a  
576 likely interaction between Adnp and 14-3-3. To test whether 14-3-3 proteins are involved in Adnp  
577 nuclear-cytoplasmic shuttling, we harvested primary cortical neurons at E15.5 and nucleofected  
578 them to express either a global 14-3-3 isoform inhibitor, difopein, or the control backbone plasmid,  
579 and fixed neurons 48 hours after re-plating and immunofluorescently stained for Adnp (Fig. 11A-  
580 B). Performing fluorescence profile analysis of all fluorophores and Adnp fluorescence intensity  
581 quantification based on cellular compartment, we found that EYFP-negative control expressing  
582 neurons had Adnp fluorescence in the nucleus, but significantly more Adnp fluorescence in the  
583 cytoplasm (Fig 11A). Due to difopein expression, Adnp was significantly more localized to the  
584 nucleus with a pattern more closely resembling neuronal stem cells than mature neurons (Fig 11B).  
585 Because it is well known that 14-3-3ε is important for cortical development and neurite formation  
586 (8, 41, 54, 55), we performed pull-down to test 14-3-3ε and Adnp binding. Using COS1 cells, we  
587 expressed HAHA-14-3-3ε and 6xHis-Adnp or HAHA and 6xHis-Adnp. We found that Adnp was  
588 pulled down by HAHA-14-3-3ε, suggesting that Adnp and 14-3-3ε bind (Fig. 11C). Taken  
589 together, these experiments provide mechanistic evidence of Adnp nuclear-cytoplasmic shuttling



590 by 14-3-3 $\epsilon$ . We conclude that as neurite formation begins, Adnp is shuttled from the nucleus to  
591 the cytoplasm by 14-3-3 $\epsilon$  where it promotes neurite formation.

592

593 **Discussion**

594 Changes in expression levels of ADNP is a characteristic of many disorders such as ADNP  
595 syndrome, ASD, ID, epilepsy, fetal alcohol syndrome, schizophrenia, and Alzheimer's disease  
596 (23, 30, 36, 56-58). Mutations in the ADNP syndrome patient population are *de novo* heterozygous  
597 nonsense and frameshift truncating mutations leading to different outcomes for the expression of  
598 the protein depending on the patient population, cell-type, and mutation-type examined. ADNP  
599 heterozygous deficiency has been well modeled in the *Adnp*<sup>+/-</sup> mouse, which has both behavioral  
600 and anatomical defects akin to ADNP syndrome (34). Similarly, somatic mutations in *ADNP* are  
601 linked to neurodegeneration in Alzheimer's disease (25). We performed a cell-type and  
602 developmental timing specific analysis of how loss of *Adnp* affects a specific subpopulation of  
603 neurons, layer 2/3 pyramidal neurons, in the developing mouse somatosensory cortex. This cell  
604 type was selected because layer 2/3 neurons are essentially integrated into many cortical circuits  
605 which are frequently disrupted in patients with ASD, and the location was selected because patients  
606 with ADNP syndrome have symptoms that indicate somatosensory processing deficits (23, 59-61).  
607 Interestingly these neurons are also possibly vulnerable to aging processes, providing a possible  
608 link to *Adnp*'s roles in neurodegeneration (62). Previous studies that have shown *NAP* and *Adnp*  
609 are positive regulators of neuritegenesis based on MAP2 fluorescence intensity (31, 37), however,  
610 the systems used and study purposes are different than ours. The original *Adnp* study was looking  
611 at neurodifferentiation from multipotent cells, here our initial *in vitro* results, which did not test  
612 *NAP* but only *Adnp*, indicated an intricate role for *Adnp* as outlined below. Our results were further  
613 confirmed *in vivo*, which was the first time such an in-depth morphological analysis on neurons  
614 deficient in *Adnp* has been performed.

615 To investigate how loss of *Adnp* affects neurite formation *in vivo* in real time, we  
616 performed *ex vivo* time-lapse live imaging at the onset of neuritegenesis at P0. By P0, the majority

617 of layer 2/3 pyramidal neurons have completed migration and arrived in their final destination at  
618 the cortical plate, where they begin neurite initiation followed by neurite elongation. Our results  
619 show striking differences between Adnp knockdown and control neurons at this time point.  
620 Control neurons are incredibly dynamic, rapidly extending and retracting various processes that  
621 are eventually stabilized to elongate. Knockdown neurons slowly but steadily extend one large  
622 primary neurite. At the beginning of live imaging, Adnp deficient neurons already had long  
623 primary neurites, suggesting that neurons begin neurite formation earlier than control. We looked  
624 at earlier developmental time points E17.5 and E18.5 and found no deficits in neuronal migration  
625 or morphology. This suggests that both control and Adnp deficient layer 2/3 pyramidal neurons  
626 arrive in the cortical plate simultaneously. It is likely that control and Adnp shRNA neurons begin  
627 neurite formation simultaneously, but Adnp deficient neurons extend neurites that slowly and  
628 stably continue to elongate due to a lack of retraction, whereas control neurons rapidly form and  
629 retract many different neurites. This is in agreement with Adnp's direct involvement in  
630 microtubule dynamics (25, 63). However, a direct investigation of how loss of Adnp effects the  
631 microtubule network during this developmental process will be crucial to understanding the  
632 cellular etiology of ADNP syndrome.

633 In terms of neurite initiation, Adnp deficient neurons do not extend many, if any, secondary  
634 neurites during this imaging. However, when a secondary neurite did emerge it was almost always  
635 stabilized, 83% of the time never retracting and re-emerging as is common in control neurons  
636 which had a 50% stabilization rate. This result can be attributed to microtubule stabilization and  
637 invasion (8, 11-13, 53), in which Adnp has a known role in both the axon growth cone and in  
638 developing dendritic spines (25, 63), and we propose that Adnp also fulfills this role during neurite  
639 initiation. Taken together the steady growth rate, lack of neurite retraction, and increased neurite

640 stabilization in Adnp deficient neurons are mechanisms that could contribute to the increased basal  
641 dendrite number and increased axon length seen in mature Adnp deficient cortical neurons. A final  
642 deficit present in these neurons is the emergence of swellings along the primary neurite. These  
643 swellings may indicate disrupted intracellular transport of large organelles such as Golgi or  
644 mitochondria which typically accumulate in newly emerged dendrites (64). Adnp also has an  
645 important known role in microtubule driven intracellular transport of cargo, specifically in the  
646 axon (36), but it is possible that Adnp may play a similar role in developing dendrites.

647         Lastly, we confirmed results present in the Adnp haploinsufficient mouse of decreased  
648 dendritic spine density on the basal and apical dendrites of layer 2/3 pyramidal neurons deficient  
649 in Adnp (34). Furthermore, we expanded on previous results by performing an unbiased,  
650 mathematical quantification of dendritic spine morphology. We found on Adnp deficient dendrites,  
651 there are significantly more thin-type spines and significantly fewer mushroom spines compared  
652 to control neurons. At P15, many spines adopt a mushroom morphology which can be considered  
653 mature and synaptically active (16, 17). These results suggest that not only do Adnp deficient  
654 neurons have less spines, but the spines present may not be synaptically active. These results  
655 combined with our morphological data presented many possibilities for the activities of these cells.

656         The increased axon length seen in our Adnp knockdown neurons was a striking and  
657 exciting phenotype. Not only are callosally projecting axons from layer 2/3 pyramidal neurons  
658 longer, but they innervate much more of the cortex compared to our control axons. We concluded  
659 that this phenotype coupled with an increase in basal dendrites could lead to cortico-cortical  
660 hyperconnectivity and excitability which is frequently seen in patients with ASD, especially those  
661 that also experience seizures as with ADNP syndrome (65-67). This phenotype could be a result  
662 of both increased axon length and aberrant axon guidance, which ultimately relies on cytoskeletal

663 dynamics in the axon growth cone. NAP, a short peptide derived from ADNP, is known to regulate  
664 microtubule invasion into the axon growth cone (53), so it is logical to suggest that full-length  
665 Adnp also regulates this process. However, as with our neurite formation results, NAP was a  
666 positive regulator of microtubule invasion (53), whereas our results suggest that full-length Adnp  
667 has a more complicated role. This possibility should be thoroughly investigated and provides  
668 further evidence for Adnp's involvement in neuronal morphogenesis being based in a cytoplasmic,  
669 microtubule-based mechanism. Another morphological aspect of Adnp deficient neurons is the  
670 deviation in the angle of the apical dendrite. Neuronal network formation heavily relies on  
671 morphological details such as this, and even small deviations in this angle can have large  
672 consequences on functional connectivity (48).

673         To test the possible effects on neuronal activity suggested by our morphological data, we  
674 performed calcium imaging as a measure of neuronal function. Adnp regulates proteins involved  
675 in calcium signaling in ways that may affect neuronal plasticity, long-term potentiation, and  
676 neurotransmitter release at glutamatergic synapses (63, 68). Calcium signaling is a reliable  
677 measure of neuronal function because action potentials trigger large, rapid changes in cytosolic  
678 calcium (69). We were the first to assess if Adnp directly regulates calcium signaling. We found  
679 increased spontaneous excitability of layer 2/3 pyramidal neurons deficient in Adnp, indicating  
680 that the decreased spine density and more immature morphology did not negatively impact the  
681 spontaneous activity of these cells. On the contrary, the increased excitability suggests that the  
682 increased basal dendrite number may be sufficient to influence neuronal excitability despite the  
683 noted spine defects. We attribute the increased calcium signaling to the morphology, as opposed  
684 to changes in calcium channel expression, because previous work has actually shown decreases in  
685 voltage-gated calcium channel protein expression, *Cacnb1*, in the hippocampus due to Adnp

686 haploinsufficiency (63). Decreased calcium channel expression would usually result in decreased  
687 calcium signaling, but we propose that the increase in dendritic number is again sufficient to  
688 overcome this channel deficit as with the dendritic spines. It would be important to investigate this  
689 possibility in the cortex, as previous work was performed in the hippocampus, to clarify the  
690 mechanism behind changes to calcium signaling in *Adnp* deficient neurons.

691         To further dissect how *Adnp* deficient neurons have increased excitability despite the noted  
692 spine defects, we wanted to probe whether cortical connectivity is also disrupted due to *Adnp*  
693 knockdown. Based on our axon tracing analysis which showed increased axon innervation to the  
694 opposing cortical hemisphere, we chose to test interhemispheric cortico-cortical connectivity  
695 between layer 2/3 pyramidal neurons. Furthermore, many ASD patients have disrupted cortico-  
696 cortical connectivity, but there is little consensus in the human population regarding the  
697 directionality of these changes (65-67, 70). We utilized the novel technique GRAPHIC to quantify  
698 synapses from axons projecting from layer 2/3 pyramidal neurons in the opposing cortical  
699 hemisphere. We found a significant increase in GFP puncta on the basal dendrites of *Adnp*  
700 deficient cells. We chose to analyze basal dendrites because these morphological changes of  
701 increased number are more likely to contribute to increased connectivity as opposed to the changes  
702 in the apical dendrite. The apical dendrite changes observed regarding the angle of extension are  
703 more likely to change to type of connectivity as opposed to the amount of connectivity. In addition  
704 to increased GFP puncta, we also found that the majority of the puncta were on the dendritic shaft  
705 of *Adnp* deficient neurons as opposed to on the spines as in control samples. This suggests that the  
706 immaturity and decreased spine density of *Adnp* deficient neurons do not negatively affect  
707 excitatory connectivity, because the connections being formed are mainly not through dendritic  
708 spines. This is similar to an observation in the *Adnp*<sup>+/-</sup> mouse which showed increased shaft PSD-

709 95 density compared to control animals (34). This phenomenon could contribute to increased  
710 excitability as seen in our calcium imaging in multiple ways. Firstly, simply the increase in  
711 excitatory contacts from the opposing cortical hemisphere. Secondly, these contacts are on the  
712 dendritic shaft, which is the site of approximately 70% of inhibitory contacts (71-73). It is possible  
713 that the location of these contacts also contributes to a subsequent decrease in inhibitory synaptic  
714 input. It is often noted in cases of ASD that there is a shift in the excitatory/inhibitory balance of  
715 neurons and circuits, and our results suggest that this is also the case for ADNP syndrome. The  
716 current study only assesses interhemispheric excitatory connections, but our morphological  
717 assessment suggests that an increase in intrahemispheric connections is also highly likely. Future  
718 studies should aim to clarify intrahemispheric connectivity as well as inhibitory connectivity to  
719 gain a comprehensive understanding of how cortical connectivity is altered due to loss of Adnp.  
720 The implications these results have on functional cortical connectivity, potentially of multiple  
721 cortical circuits, cannot be understated.

722 To probe the appropriate cellular mechanism underlying our morphological phenotypes we  
723 first performed Adnp localization analysis as neurons underwent neuriteogenesis, because Adnp is  
724 a multifunctional protein with roles in both the nucleus and the cytoplasm (22, 23, 34, 35, 53, 74).  
725 We found that Adnp is shuttled from the nucleus to the cytoplasm in neuronal stem cells versus  
726 neurons in late-stages of neurite elongation, 48 hours following re-plating. It has been previously  
727 reported that Adnp is crucial for stem cell and embryo development (51, 52, 75, 76), and upon  
728 retinoic acid induced differentiation of embryonic carcinoma cells (P19) Adnp is shuttled from the  
729 nucleus to the cytoplasm (37). Our study confirms these results and is the first to show this  
730 phenomenon in a neuronal model. These results suggest that Adnp changes its function from  
731 mostly nuclear to remodel chromatin and promotes expression of neuronal differentiation inducing

732 genes to mostly cytoplasmic to promote neurite formation. Furthermore, our *in vivo* staining  
733 patterns reveal Adnp is located exclusively in the cytoplasm of neurons in the cortex at P15, which  
734 is when our morphological analyses took place. 14-3-3 proteins are well known nuclear-  
735 cytoplasmic shuttles that are crucial for neuronal development and neurite formation (8, 41, 55,  
736 77-79). By expressing a global 14-3-3 isoform inhibitor in primary cortical neurons we trapped  
737 the majority of Adnp in the nucleus, resulting in cells with Adnp localization that was similar to  
738 that of neuronal stem cells. Some Adnp was still present in the cytoplasm of these neurons, possibly  
739 due to our use of a global inhibitor as opposed to a specific isoform knockdown. We performed *in*  
740 *silico* sequencing analysis that revealed a likely interaction between 14-3-3 $\epsilon$  and Adnp, and we  
741 tested this by performing a pull-down experiment where we found that Adnp and 14-3-3 $\epsilon$  do bind.  
742 This mechanism requires further study to identify the binding site and upstream signals, such as  
743 kinases, that promote this timing specific interaction and subsequent shuttling. This shuttling  
744 mechanism could also be important for understanding cases of ADNP syndrome where mutations  
745 result in a nuclear/cytoplasmic localization shift in ADNP, as opposed to a decrease in protein  
746 expression (80).

747       Taken together, this information allows us to propose a model for how Adnp expression  
748 and subcellular localization changes to promote neurite formation during cortical development:  
749 Adnp is highly localized in the nucleus in immature neurons to regulate the expression of lineage-  
750 specific genes and to promote differentiation (51, 52, 74), then as differentiation begins Adnp  
751 travels into the cytoplasm aided by 14-3-3 $\epsilon$  and along developing neurites where it leads to  
752 appropriate neurite formation (Fig. 12A). When expression of Adnp is decreased in layer 2/3  
753 pyramidal neurons, as in ADNP syndrome and other developmental and psychiatric disorders,  
754 neurite formation is increased resulting in a longer axon and more basal dendrites and subsequent



755 increased spontaneous excitability and interhemispheric cortico-cortical connectivity (Fig 12B).  
756 Further mechanistic studies for how Adnp promotes proper neuronal morphology once it is present  
757 in the cytoplasm will be crucial to gain a proper understanding of the cellular etiology of how loss  
758 of ADNP effects this developmental process. Our results reveal a snowball-effect of complex  
759 morphological and functional deficits in layer 2/3 pyramidal neurons in the developing mouse  
760 somatosensory cortex due to loss of Adnp, and help shed light on the phenotypic complexity seen  
761 in both the Adnp haploinsufficient mouse as well as the ADNP syndrome patient population (23,  
762 34). We have pinpointed that P0 is when deficits begin for Adnp deficient neurons and these severe  
763 deficits are sustained and worsened throughout development; seeming to affect many subsequent  
764 maturation stages such as axon guidance, calcium signaling, and cortical connectivity. Future  
765 studies to uncover the mechanism behind the primary phenotype, which we pinpointed as  
766 neuritogenesis, will be crucial for therapeutic innovation, including NAP potential homeostatic  
767 activity.

768

769

770 **Figure Legends**

771 **Figure 1. Immunofluorescence staining shows Adnp is expressed in primary cortical neurons**

772 **and throughout the cortical plate.** A) Primary cortical neurons harvested from E15.5 mouse

773 embryos and cultured for 48 hours express Adnp in the cell soma and extending neurites. DAPI

774 marks the nucleus, and  $\beta$ III-tubulin is used as a cytoplasmic and neurite marker as well as to

775 identify neurons. Scale bar= 100  $\mu$ m B) High magnification of neurites expressing Adnp. C) Adnp

776 is expressed throughout the cortical plate. The brain was harvested from a P15 mouse. Scale bar=

777 50  $\mu$ m D) High magnification of cells in the cortical plate expressing Adnp. (3 independent staining

778 experiments from 3 different litters)

779

780 **Figure 2. Adnp knockdown produces neurite initiation and elongation defects *in vitro*.** A)

781 Representative neurons expressing Scramble-shRNA-Venus, Adnp-shRNA-Venus, or the rescue

782 groups. The rescue group co-expresses Adnp-shRNA-Venus and an Adnp-mScarlet expression

783 vector (“Adnp OE”), which restores Adnp expression in Adnp deficient neurons; and the rescue

784 control group which co-expresses Scramble-shRNA-Venus and the empty mScarlet backbone

785 Adnp expression vector (“Control OE”). B) Quantification of length of the longest neurite. A one-

786 way ANOVA showed a significant difference in length of the longest neurite between groups,  $F(3,$

787  $151)=4.904$ ,  $p=0.003$ . Bonferroni post hoc comparison showed that Adnp shRNA neurons had

788 significantly longer neurites ( $150.979\mu\text{m} \pm 14.233\mu\text{m}$ ) compared to Scramble shRNA ( $98.459\mu\text{m}$

789  $\pm 9.305\mu\text{m}$ ,  $p=0.007$ ), rescue ( $105.566\mu\text{m} \pm 9.258\mu\text{m}$ ,  $p=0.028$ ), and rescue control neurons

790 ( $101.316\mu\text{m} \pm 11.307\mu\text{m}$ ,  $p=0.013$ ). Scramble shRNA neurons did not significantly differ from

791 the rescue neurons ( $p=1.000$ ) or the rescue control neurons ( $p=1.000$ ). C) Quantification of neurite

792 number. A one-way ANOVA showed a significant difference in number of neurites between

793 groups,  $F(3, 152)=6.283$ ,  $p<0.0001$ . Bonferroni post hoc comparison showed that Adnp shRNA  
794 neurons had significantly more neurites ( $5.949 \pm 0.389$ ) compared to Scramble shRNA ( $4.539 \pm$   
795  $0.354$ ,  $p=0.018$ ), rescue ( $4.075 \pm 0.259$ ,  $p=0.001$ ), and rescue control neurons ( $4.395 \pm 0.312$ ,  
796  $p=0.007$ ). Scramble shRNA neurons did not significantly differ from the rescue neurons ( $p=1.000$ )  
797 or the rescue control neurons ( $p=1.000$ ). D) Sholl analysis for neurite branching corroborates  
798 morphology analysis, with Adnp shRNA neurons having greater branching towards the soma,  
799 indicating increased neurite number, and a single branch point extending towards a greater distal  
800 length, indicating increased length of the longest neurite. A two-way repeated measures ANOVA  
801 revealed a significant difference between groups on neurite branching  $F(3, 125) = 4.245$ ,  $p=0.0068$ .  
802 ( $n=40$  measurements per group from 40 distinct neurons, 3 independent experiments per condition  
803 from 3 different litters). Scale bars =  $50\mu\text{m}$ .

804

805 **Figure 3. Adnp knockdown produces defects in basal dendrite development *in vivo*. A)**

806 Representative photos of layer 2/3 pyramidal neurons at P15 expressing Scramble shRNA, Adnp  
807 shRNA, Rescue, or Rescue control plasmids. Accompanying each representative photo is a color-  
808 coded tracing for clear visualization and comparison of dendritic morphology. Red= apical  
809 dendrite, green= basal dendrites, blue= axon, black= soma. B) Quantification of basal dendrite  
810 number between groups ( $n=25$  neurons). A one-way ANOVA revealed a significant difference in  
811 basal dendrite number between groups,  $F(3, 96) = 9.287$ ,  $p<0.0001$ . Bonferroni post hoc  
812 comparison showed that Adnp shRNA neurons had significantly more basal dendrites ( $4.160 \pm$   
813  $0.264$ ) compared to Scramble shRNA ( $2.520 \pm 0.232$ ,  $p<0.001$ ), rescue ( $3.000 \pm 0.238$ ,  $p=0.004$ ),  
814 and rescue control neurons ( $2.880 \pm 0.194$ ,  $p=0.001$ ). Scramble shRNA neurons did not  
815 significantly differ from the rescue neurons ( $p=0.890$ ) or the rescue control neurons ( $p=1.000$ ).

816 Scale bars= 100 $\mu$ m. IUE was performed at E15.5. C) Quantification of basal dendrite length  
817 between groups. A one-way ANOVA revealed a significant difference in basal dendrite length  
818 between groups,  $F(3, 103) = 15.376$ ,  $p < 0.0001$ . Bonferroni post hoc comparison showed that Adnp  
819 shRNA neurons had significantly shorter basal dendrites ( $87.478\mu\text{m} \pm 3.228\mu\text{m}$ ,  $n=25$ ) compared  
820 to Scramble ( $138.064\mu\text{m} \pm 4.566\mu\text{m}$ ,  $p < 0.0001$ ,  $n=25$ ), rescue ( $142.510\mu\text{m} \pm 8.982\mu\text{m}$ ,  
821  $p < 0.0001$ ,  $n=26$ ), and rescue control neurons ( $124.858\mu\text{m} \pm 6.067\mu\text{m}$ ,  $p < 0.0001$ ,  $n=31$ ). Scramble  
822 shRNA neurons did not significantly differ from the rescue neurons ( $p=1.000$ ) or the rescue control  
823 neurons ( $p=0.766$ ). Measurements for basal dendrite length were taken from 15 distinct neurons.  
824 (3 independent experiments per condition from 3 different litters).

825

826 **Figure 4. Adnp knockdown increases interhemispheric cortical axon length and innervation**

827 **throughout the opposing cortex.** IUE was performed at E15.5. and brains were collected at P15.

828 A) Low magnification representative photos of P15 brain slices from Scramble shRNA and Adnp

829 shRNA expressing mice. All high magnification photos were taken of these slices. B) High

830 magnification representative photos of the axon bundle crossing the midline. C) Quantification of

831 axon bundle width as it crosses the midline. An independent samples t-test showed that there was

832 no significant difference between bundle width between Scramble shRNA ( $0.113\text{mm} \pm 0.012\text{mm}$ ,

833  $n=9$ ) and Adnp shRNA ( $0.122\text{mm} \pm 0.014\text{mm}$ ,  $n=7$ ) expressing axons (95% CI, -0.050 to 0.031),

834  $t(14) = -0.516$ ,  $p=0.614$ , indicating that there is no difference in number of axons crossing the

835 midline. D) Quantification of length of the axon bundle after crossing the midline. An independent

836 samples t-test showed that Adnp shRNA expressing neurons extended axons a significantly greater

837 distance across the midline ( $3.887\text{mm} \pm 0.441\text{mm}$ ,  $n=8$ ) compared to Scramble shRNA expressing

838 neurons ( $2.453\text{mm} \pm 0.128\text{mm}$ ,  $n=10$ ) (95% CI, -2.318 to -0.550),  $t(16) = -3.438$ ,  $p=.0003$ . E)

839 High magnification representative photos of the opposing hemispheres from the ventricle. F) High  
840 magnification representative photos of the area where the axon bundles terminate. G)  
841 Quantification of axon innervation throughout the opposing cortical hemisphere as measured by  
842 Venus intensity. H) High magnification representative photos of the opposing hemisphere from  
843 the axon bundle. Scale bars= 1 mm. (reported n refers to number of brain slices, 3 independent  
844 experiments per condition from 3 different litters).

845

846 **Figure 5. Adnp knockdown disrupts apical dendrite development *in vivo*.** IUE was performed  
847 at E15.5 and brains were collected at P3. A) Schematic for how the angle of the apical dendrite  
848 was measured. Angles were measured by drawing one line from the soma perpendicular to the  
849 cortical plate and another line from the soma to the middle of the apical dendrite. The angle  
850 between these lines was measured. The red dotted line represents the pial surface. Representative  
851 photos of layer 2/3 pyramidal neurons expressing Scramble shRNA (B), Adnp shRNA (C), rescue  
852 plasmids Adnp-shRNA-Venus and Adnp-mScarlet (“Adnp OE”) (D), and rescue control plasmids  
853 Scramble-shRNA-Venus and mScarlet backbone vector (“Control OE”) (E). All photos are  
854 accompanied by tracings of 6 representative neurons for clear visualization of apical dendrite  
855 morphology, and by polar histograms which quantify the angles at which the apical dendrites  
856 extended with respect to the cortical plate. F) Quantification of the angle of the apical dendrite  
857 from the soma. These graphs depict the degrees by which the apical dendrites deviate from the  
858 expected 90°, with the greater angle indicating a greater defect. A one-way ANOVA showed that  
859 there was a difference in apical dendrite angle deviation between groups  $F(3,109)= 26.751$ ,  
860  $p<0.0001$ . Bonferroni post hoc comparison revealed that Adnp shRNA expressing neurons had a  
861 significantly greater deviation from 90° ( $27.807^\circ \pm 2.244^\circ$ ,  $n=26$ ) compared to Scramble shRNA

862 (12.287° ± 1.489°, p<0.0001, n=29), rescue (10.070° ± 1.554°, p<0.0001, n=29), and rescue  
863 control (11.015° ± 0.881°, p<0.0001, n=29). Scramble shRNA neurons did not significantly differ  
864 from the rescue neurons (p=1.000) or the rescue control neurons (p=1.000). G) Quantification of  
865 the width of the apical dendrites with respect to the soma, which was calculated by dividing the  
866 apical dendrite width by the soma width to account for soma width variation. A one-way ANOVA  
867 showed that there was a significant difference between groups,  $F(3,88) = 20.374$ , p<0.0001.  
868 Bonferroni post hoc comparison showed that Adnp shRNA neurons had significantly wider apical  
869 dendrites with respect to the soma ( $0.418\mu\text{m} \pm 0.025\mu\text{m}$ , n=25) compared to Scramble shRNA  
870 ( $0.277\mu\text{m} \pm 0.019\mu\text{m}$ , p<.0001, n=23), rescue ( $0.253\mu\text{m} \pm 0.015\mu\text{m}$ , p<.0001, n=24), and rescue  
871 control neurons ( $0.229\mu\text{m} \pm 0.013\mu\text{m}$ , p<0.0001, n=24). Scramble shRNA neurons did not  
872 significantly differ from the rescue neurons (p=1.000) or the rescue control neurons (p=0.525).  
873 Scale bars= 10  $\mu\text{m}$ . (reported n refers to both number of apical dendrites and number of distinct  
874 neurons, 3 independent experiments per condition from 3 different litters).

875  
876 **Figure 6. Live imaging reveals that deficits in neuritogenesis due to Adnp knockdown begin**  
877 **at P0.** IUE was performed at E15.5 and brains were collected at P0. A two-tailed independent  
878 samples t-test was used for all statistical analyses unless otherwise indicated. (reported n refers to  
879 number of distinct neurons, 3 independent experiments per condition from 3 different litters). A)  
880 Representative time-lapse images of Scramble shRNA and Adnp shRNA expressing neurons over  
881 the course of 600 minutes, or 10 hours. Each panel is time-stamped with the minutes. Scale bar =  
882 10 $\mu\text{m}$ . B) Quantification of starting length of the neurites present at the start of imaging. Adnp  
883 shRNA expressing neurons had significantly longer neurites ( $30.090\mu\text{m} \pm 3.160\mu\text{m}$ , n=10)  
884 compared to Scramble shRNA expressing neurons ( $6.723\mu\text{m} \pm 0.938\mu\text{m}$ , n=10), (95% CI 16.62

885 to 30.12),  $t(28) = 7.090$ ,  $p < 0.0001$ . C) Quantification of neurite length throughout the 10-hour  
886 imaging. A two-way repeated measures ANOVA revealed a significant difference between Adnp  
887 shRNA and Scramble shRNA neurite growth,  $F(1, 28) = 29.01$ ,  $p < 0.0001$ ,  $n = 10$ . D) Quantification  
888 of the maximum growth velocity ( $V_{maxg}$ ) of neurites. Adnp shRNA expressing neurons had a  
889 significantly slower  $V_{maxg}$  ( $0.589\mu\text{m}/\text{min} \pm 0.083\mu\text{m}/\text{min}$ ,  $n = 14$ ) compared to Scramble shRNA  
890 expressing neurons ( $0.824\mu\text{m}/\text{min} \pm 0.079\mu\text{m}/\text{min}$ ,  $n = 15$ ), (95% CI 0.002 to 0.470),  $t(27) = 2.067$ ,  
891  $p = 0.048$ . E) Quantification of the maximum retraction velocity ( $V_{maxr}$ ) of neurites. Adnp shRNA  
892 expressing neurons had a significantly slower  $V_{maxr}$  ( $-0.575\mu\text{m}/\text{min} \pm 0.088\mu\text{m}/\text{min}$ ) compared  
893 to Scramble shRNA expressing neurons ( $-0.857\mu\text{m}/\text{min} \pm 0.070\mu\text{m}/\text{min}$ ), (95% CI -0.512 to -  
894 0.052),  $t(28) = -2.511$ ,  $p = 0.018$ ,  $n = 15$ . F) Quantification of neurite growth throughout imaging.  
895 Adnp shRNA expressing neurons had significantly less total growth ( $6.585\mu\text{m} \pm 1.713\mu\text{m}$ ,  $n = 11$ )  
896 compared to Scramble shRNA expressing neurons ( $12.934\mu\text{m} \pm 1.918\mu\text{m}$ ,  $n = 10$ ), (95% CI 0.984  
897 to 11.713),  $t(19) = 2.477$ ,  $p = 0.023$ . G) Quantification of number of neurites emerged throughout  
898 the imaging. Adnp shRNA expressing neurons had significantly fewer neurites emerge ( $1.857 \pm$   
899  $.376$ ,  $n = 14$ ) compared to Scramble shRNA ( $3.333 \pm 0.374$ ,  $n = 15$ ), (95% CI 0.387 to 2.565),  $t(27)$   
900  $= 2.782$ ,  $p = 0.010$ . H) Quantification of neurites stabilized (present and elongating) and the  
901 conclusion of imaging. There was no significant difference between Adnp shRNA neurons ( $1.286$   
902  $\pm 0.125$ ) and Scramble shRNA neurons ( $1.357 \pm 0.169$ ), (95% CI -0.361 to 0.504),  $t(26) = 0.339$ ,  
903  $p = 0.737$ ,  $n = 14$ . I) Quantification of the ratio of stabilized to emerged neurites. This ratio indicates  
904 the likelihood of each neurite that emerges being stabilized. Adnp shRNA neurons had a  
905 significantly higher rate of stabilization ( $0.831 \pm 0.068$ ) compared to Scramble shRNA ( $0.521 \pm$   
906  $0.285$ ), (95% CI -0.514 to -0.105),  $t(28) = -3.098$ ,  $p = 0.004$ ,  $n = 15$ . J) Quantification of number of  
907 retraction events throughout the imaging. Adnp shRNA expressing neurons retracted significantly

908 fewer neurites ( $3.133 \pm 0.675$ ) compared to Scramble shRNA ( $6.733 \pm 0.842$ ), (95% CI 1.389 to  
909 5.811),  $t(28) = 3.335$ ,  $p=0.002$ ,  $n=15$ . K) Representative photos of swellings on the apical  
910 dendrites. Scale bar=  $5\mu\text{m}$ . L) Quantification of swelling events on the primary neurite throughout  
911 imaging. A two-way repeated measures ANOVA revealed a statistically significant difference  
912 between groups,  $F(1, 28)=11.95$ ,  $p = 0.0018$ . M) Quantification of amount of swellings per frame  
913 of imaging (10 minutes). Adnp shRNA neurons had significantly more swellings ( $3.857 \pm 0.523$ ,  
914  $n=14$ ) compared to Scramble shRNA ( $0.333 \pm 0.159$ ,  $n=15$ ), (95% CI -4.613 to -2.435),  $t(27) = -$   
915 6.641,  $p<0.0001$ . N) Quantification of primary neurite width. Adnp shRNA neurons had  
916 significantly wider primary neurites ( $4.300\mu\text{m} \pm 0.374$ ) compared to Scramble shRNA ( $2.728\mu\text{m}$   
917  $\pm 0.216$ ), (95% CI -2.357 to -0.587),  $t(28) = -3.405$ ,  $p=0.002$ ,  $n=15$ .

918

919 **Figure 7. Adnp knockdown disrupts dendritic spine development *in vivo*.** IUE was performed  
920 at E15.5 and brains were collected at P15. Scale bars=  $10\mu\text{m}$  A) Schematic depicting quantitative  
921 criteria for spine morphology categories, modified from Rischer et al. (42). B-C) Representative  
922 photo of dendritic spines present on a neuron expressing Scramble shRNA (B) or Adnp shRNA  
923 (C). D) Quantification of proportion of spines with differing morphologies. The bar graph displays  
924 the spine count per morphology as a proportion of total spines. A chi-squared test for homogeneity  
925 revealed there was significant difference in proportions of spine morphologies between Scramble  
926 shRNA and Adnp shRNA expressing neurons ( $p<0.001$ ). The percentages of spine morphologies  
927 were as follows: long thin (Scramble shRNA 15.7%, Adnp shRNA 22%), thin (Scramble shRNA  
928 36.1%, Adnp shRNA 47.6%), stubby (Scramble shRNA 6.0%, Adnp shRNA 20.7%), mushroom  
929 (Scramble shRNA 42.2%, Adnp shRNA 9.8%). There were only two cases of branched spines on  
930 Scramble shRNA dendrites and 3 on Adnp shRNA dendrites, and therefore this morphology was



931 excluded from statistical analysis due to  $n < 5$ . E) Quantification of dendritic spine density per  $\mu\text{m}$ .  
932 An independent samples t-test revealed a slight yet significant decrease in dendritic spine density  
933 in Adnp shRNA expressing neurons ( $1.003 \pm 0.05456$ ) compared to Scramble shRNA ( $1.166 \pm$   
934  $0.05794$ ), (95% CI -0.3214 to -0.002944),  $t(57) = 2.039$ ,  $p = 0.0460$ . (n=85 dendritic spines from  
935 25 dendrites from 10 neurons per group, 3 independent experiments per condition from 3 different  
936 litters).

937  
938 **Figure 8. Adnp deficient cells exhibit increased spontaneous calcium signaling.** IUE was  
939 performed at E15.5 and imaging took place at P30. A) Fluorescence percent change traces from 5  
940 representative cells from Scramble or Adnp shRNA expressing neurons. B) Quantification of  
941 fluorescence percent change peaks. The red dotted line indicates the peak fluorescence threshold  
942 to reliably predict single action potential firing as defined by Chen et al. as  $23\% \pm 3.2\%$  for  
943 GCaMPs (44). An independent samples t-test revealed that Adnp shRNA neurons had a  
944 significantly higher peak fluorescence percent change ( $16.844\% \pm 1.217\%$ ,  $n=27$ ) compared to  
945 Scramble shRNA ( $13.186\% \pm 1.071\%$ ,  $n=25$ ), (95% CI -6.95237 to -0.36367),  $t(49) = -2.231$ ,  $p =$   
946  $0.030$ . C) Quantification of the proportions of cells that did or did not reach fluorescence threshold  
947 to indicate and action potential. 20% of Scramble shRNA expressing neurons ( $n=25$ ) and 33.3%  
948 of Adnp shRNA neurons ( $n=27$ ) reached fluorescence threshold, however this is not a statistically  
949 significant difference using a chi-squared test for homogeneity ( $p=0.279$ ). (3 independent  
950 experiments per condition from 3 different litters).

951  
952 **Figure 9. GRAPHIC reveals increased excitatory interhemispheric cortical connectivity and**  
953 **shaft synapses on Adnp deficient basal dendrites.** A) Schematic for GRAPHIC's GFP

954 reconstitution system between neurons in the left and right cortical hemispheres. GFP puncta are  
955 exclusive to sites of synaptic contact between these two populations of neurons. Figure created  
956 using biorender.com. B) Schematic and validation of GRAPHIC transfection of layer 2/3  
957 pyramidal neurons. The left hemisphere is mCherry positive and the right hemisphere is H2B-  
958 mCherry positive. Scale bar = 1 mm. Figure created using biorender.com. C) High magnification  
959 representative photos of basal dendrites with synaptic contacts. Scale bars = 10 $\mu$ m. D)  
960 Quantification of GFP puncta per 10 $\mu$ m. An independent samples t-test revealed that Adnp shRNA  
961 neurons ( $8.708 \pm .669$ , n=24 measurements from 20 distinct dendrites from 12 different neurons)  
962 had significantly more GFP puncta compared to Scramble shRNA neurons ( $4.720 \pm .349$ , n=25  
963 measurements from 22 distinct dendrites from 19 different neurons), (95% CI 2.488 to 5.488),  
964  $t(47)=5.349$ ,  $p<0.0001$ . E) Quantification of the proportions of puncta on the dendritic shaft vs.  
965 spines. A chi-squared test for homogeneity revealed there was significant difference in proportions  
966 of shaft vs. spine synapses in Adnp shRNA (27.42% spine, 72.58% shaft) compared to Scramble  
967 shRNA neurons (71.77% spine, 28.23% shaft),  $p<0.0001$ . (2 independent experiments per  
968 conditions from 2 different litters).

969

970 **Figure 10. Adnp localization shifts from the nucleus to the cytoplasm as cortical neurons**  
971 **mature.** A) Representative photos of Adnp localization in neuronal stem cells grown as  
972 neurospheres from low magnification to high magnification. Scale bars = 1 mm (low  
973 magnification) and 25  $\mu$ m (high magnification) B) Representative photos of Adnp localization in  
974 primary cortical neurons after neurite elongation from low magnification to high magnification.  
975 Scale bars= 50  $\mu$ m (low magnification) and 25  $\mu$ m (high magnification) C) Adnp fluorescence  
976 intensity in the nucleus and the cytoplasm of neurospheres. Each measurement from the nucleus

977 and the cytoplasm was taken from the same cell. Therefore, a paired samples t-test was used for  
978 analysis. This test showed that there is significantly greater Adnp fluorescence in the nucleus  
979 ( $10008 \pm 737.4$ ) than in the cytoplasm ( $3551 \pm 348.9$ ), (95% CI -8045 to -4909),  $t(21) = 8.589$ ,  $p$   
980  $<0.001$ ,  $n=22$ . D) Adnp fluorescence intensity in the nucleus vs. the cytoplasm of mature neurons.  
981 Each measurement was taken from the same cell, therefore a paired-samples t-test was used for  
982 analysis. There is significantly greater Adnp fluorescence intensity in the cytoplasm ( $97730 \pm$   
983  $9555$ ) compared to the nucleus ( $20705 \pm 1694$ ), (95% CI 58088 to 95962),  $t(20) = 8.484$ ,  
984  $p<0.0001$ ,  $n=21$ . E) High magnification representative photos of the soma of an immature vs.  
985 mature neuron. Scale bars= 10  $\mu\text{m}$ , F) Fluorescence intensity plots of the representative cells. G)  
986 Ratios of nuclear to cytoplasmic Adnp fluorescence intensity in neurospheres vs. mature neurons.  
987 This ratio was calculated by dividing the nuclear fluorescence by the cytoplasmic fluorescence for  
988 each cell. An independent samples t-test showed that neurospheres had a significantly higher ratio  
989 ( $3.665 \pm 0.408$ ,  $n=23$ ) than mature neurons ( $0.247 \pm 0.0267$ ,  $n=24$ ), (95% CI -4.224 to -2.611),  
990  $t(45) = 8.533$ ,  $p<0.001$ . (independent experiments per condition from 3 different litters, stem cells  
991 analyzed from 5 distinct neurospheres).

992

993 **Figure 11. Global 14-3-3 protein inhibition traps Adnp in the nucleus, and Adnp binds 14-3-**  
994 **3ε.** A) Representative photo of Adnp staining in neurons expressing the backbone plasmid  
995 expressing EYFP as a negative control. Scale bar=5  $\mu\text{m}$ . Accompanying the photo is its  
996 fluorescence intensity profile for all fluorophores. A paired samples t-test revealed significantly  
997 more Adnp fluorescence in the cytoplasm ( $53563 \pm 8742$ ) compared to the nucleus ( $7140 \pm 763.7$ ),  
998 (95% CI 28873 to 63974),  $t(22) = 5.486$ ,  $p<0.0001$ ,  $n=23$ . B) Representative photo of Adnp  
999 staining in neurons expressing EYFP-Difopein which is a global 14-3-3 inhibitor. Scale bar= 5

1000  $\mu\text{m}$ . Accompanying the photo is its fluorescence intensity profile for all fluorophores. A paired  
1001 samples t-test revealed significantly more Adnp fluorescence in the nucleus ( $11809 \pm 2263$ )  
1002 compared to the cytoplasm ( $3756 \pm 1004$ ), (95% CI -12828 to -3279),  $t(12) = 3.675$ ,  $p=0.0032$ ,  
1003  $n=13$ . (3 independent experiments per condition from 3 different litters). C) Western blot from  
1004 pull-down analysis using HAHA-conjugated beads, His-tagged Adnp, HAHA-tagged 14-3-3 $\epsilon$ , and  
1005 HAHA-tag alone as a negative control. His-Adnp is detected by western blot only when combined  
1006 with HAHA-14-3-3 $\epsilon$  and not HAHA, indicating that Adnp is pulled down by 14-3-3 $\epsilon$ . This  
1007 suggests that Adnp and 14-3-3 $\epsilon$  bind. (3 independent experiments).

1008  
1009 **Figure 12. Model for Adnp's regulation of neurite formation.** A) Adnp is present in the nucleus  
1010 of neuronal stem cells. Upon differentiation, Adnp binds to and subsequently shuttled out of the  
1011 nucleus by 14-3-3 $\epsilon$  where it promotes appropriate neurite formation. Proper neurite formation  
1012 allows for proper axon and dendrite development, which ultimately results in proper neuronal  
1013 connectivity and function. B) Partial loss of Adnp results in increased neurite initiation of neurites  
1014 likely to become dendrites, and increased neurite elongation of the neurite likely to become the  
1015 axon. This results in increased basal dendrite formation and axon length, which ultimately results  
1016 in increased spontaneous cortical excitability. Figures created using biorender.com.

1017  
1018 **Supplemental Figure 1. Adnp shRNA can effectively knockdown Adnp.** A-B) Representative  
1019 photos of endogenous Adnp staining in mature primary cortical neurons expressing Scramble  
1020 shRNA or Adnp shRNA at low magnification (A) and high magnification (B). C) Comparison of  
1021 Adnp fluorescence intensity in Scramble shRNA and Adnp shRNA expressing neurons. An  
1022 independent samples t-test shows that Adnp shRNA expressing neurons have a significantly lower

1023 Adnp fluorescence intensity ( $72290 \pm 16469$ ) compared to Scramble shRNA ( $599955 \pm 61742$ ),  
1024 (95% CI -656146 to -399184),  $t(48) = 8.258$ ,  $p < 0.001$ . (n=25, 3 independent experiments per  
1025 condition from 3 different litters). D) Representative western blots validating our Adnp shRNA,  
1026 Adnp-His, and scramble shRNA plasmids used in all experiments. Plasmids were co-transfected  
1027 into HEK293T cells. Quantification of westerns blots which were performed in triplicate. Adnp  
1028 expression was normalized to total protein expression in each sample using REVERT total protein  
1029 stain. An independent samples t-test showed that Adnp shRNA significantly reduced Adnp-His  
1030 protein expression ( $3.480 \times 10^{-3} \pm 2.497 \times 10^{-3}$ ) compared to Scramble shRNA ( $0.128 \pm 0.048$ ),  
1031 (95% CI -0.2289 to -0.01994),  $t(5) = 3.061$ ,  $p = 0.0281$ , with ~ 97% efficiency. E) Representative  
1032 western blots validating our Scramble shRNA, Adnp shRNA, and shRNA Resistant Adnp (Resist  
1033 Adnp-His) plasmids used in rescue experiments. Plasmids were co-transfected into HEK293T  
1034 cells. Quantification of western blots which were performed in triplicate. Adnp expression was  
1035 normalized to total protein expression in each sample using REVERT total protein stain. An  
1036 independent samples t-test showed that there was no significant difference in Adnp expression  
1037 between Adnp shRNA and Scramble shRNA when co-expressed with Resist Adnp,  $p=0.443$ .

1038

1039 **Supplemental Figure 2. Shorter neurites' length is not affected by Adnp KD *in vitro*.**

1040 Quantification of length of the shorter neurites, as opposed to the longest neurite. A one-way  
1041 ANOVA showed that there were no significant differences between groups,  $F(3, 149) = 2.146$ ,  
1042  $p=0.0968$ . (Scramble shRNA n=37, Adnp shRNA n=40, Rescue n=38, Rescue control n=38, 3  
1043 independent experiments per condition from 3 different litters)

1044

1045 **Supplemental Figure 3. IUE targets neurons that migrate to layer 2/3.** IUE of mouse embryos  
1046 at E15.5 specifically transfects layer 2/3 neurons. The brain was harvested at P15. Brn2 staining  
1047 was used because it specifically marks layers 2/3 and 5 (47). A Scramble-shRNA-Venus plasmid  
1048 was used for electroporation. There is clear colocalization of Venus and Brn2. Scale bar= 50  $\mu\text{m}$ .

1049  
1050 **Supplemental Figure 4. Apical dendrite length is not affected by Adnp KD *in vivo*.**  
1051 Quantification of apical dendrite length at P15 after IUE at E15.5 using a one-way ANOVA  
1052 revealed no significant differences between groups,  $F(3, 93) = 0.3682$ ,  $p=0.776$ , (Scramble shRNA  
1053  $n=25$ , Adnp shRNA  $n=24$ , Rescue  $n=25$ , Rescue control  $n=23$ , 3 independent experiments per  
1054 condition from 3 different litters)

1055  
1056  
1057 **Supplemental Figure 5. Apical dendrite deficits from P3 are sustained through P15.** A-D)  
1058 IUE was performed at E15.5 and brains were collected at P15. Representative photos of layer 2/3  
1059 pyramidal neurons expressing Scramble shRNA (A), Adnp shRNA (B), rescue plasmids Adnp-  
1060 shRNA-Venus and Adnp-mScarlet (“Adnp OE”) (C), and rescue control plasmids Scramble-  
1061 shRNA-Venus and mScarlet backbone vector (“Control OE”) (D). E-H) Polar histograms of  
1062 Scramble shRNA (E), Adnp shRNA (F), rescue (G), and rescue control (H) expressing neurons  
1063 which quantifies the angles at which the apical dendrites extended with respect to the cortical plate.  
1064 I) Quantification of the width of the apical dendrites with respect to the soma. A one-way ANOVA  
1065 showed that there was a significant difference between groups,  $F(3,89) = 13.263$ ,  $p<0.0001$ ,  $n=24$   
1066 Bonferroni post hoc comparison showed that Adnp shRNA neurons had significantly wider apical  
1067 dendrites with respect to the soma ( $0.239\mu\text{m} \pm 0.014\mu\text{m}$ ) compared to Scramble shRNA ( $0.156\mu\text{m}$ )

1068  $\pm 0.012\mu\text{m}$ ,  $p<0.0001$ ), rescue ( $0.143\mu\text{m} \pm 0.011\mu\text{m}$ ,  $p<0.0001$ ), and rescue control neurons  
1069 ( $0.161\mu\text{m} \pm 0.011\mu\text{m}$ ,  $p<0.0001$ ). Scramble shRNA neurons did not significantly differ from the  
1070 rescue neurons ( $p=1.000$ ) or the rescue control neurons ( $p=1.000$ ). J) Quantification of the angle  
1071 of the apical dendrite from the soma. A one-way ANOVA showed that there was a difference in  
1072 apical dendrite angle deviation between groups  $F(3,112)= 6.457$ ,  $p<0.0001$ ,  $n=29$ . Bonferroni post  
1073 hoc comparison revealed that Adnp shRNA expressing neurons had a significantly greater  
1074 deviation from  $90^\circ$  ( $18.061^\circ \pm 1.452^\circ$ ) compared to Scramble shRNA ( $10.924^\circ \pm 1.147^\circ$ ,  $p=0.002$ ),  
1075 rescue ( $11.441^\circ \pm 1.405^\circ$ ,  $p=0.004$ ), and rescue control ( $11.303^\circ \pm 1.369^\circ$ ,  $p=0.003$ ). Scramble  
1076 shRNA neurons did not significantly differ from the rescue neurons ( $p=1.000$ ) or the rescue control  
1077 neurons ( $p=1.000$ ). Scale bars=  $100\mu\text{m}$ . (3 independent experiments per condition from 3 different  
1078 litters).

1079  
1080 **Supplemental Figure 6. Adnp KD neurons have no cortical distribution defects following**  
1081 **neurogenesis or neuronal migration.** MZ= marginal zone, CP= cortical plate, IZ= intermediate  
1082 zone, SVZ/VZ= subventricular zone/ventricular zone. A) Representative photos of E17.5 cortices  
1083 after IUE at E15.5, just following neurogenesis. According to a two-way repeated measures  
1084 ANOVA, Adnp shRNA neurons had no significant differences in percentage of cells in each  
1085 cortical zone compared to Scramble shRNA neurons,  $F(4, 12)= 6.341 \times 10^{-7}$ ,  $p=1.000$ . B)  
1086 Representative photos of E18.5 cortices after IUE at E15.5. According to a two-way repeated  
1087 measures ANOVA, Adnp shRNA neurons had no significant differences in percentage of cells in  
1088 each cortical zone compared to Scramble shRNA neurons,  $F(4, 12)= 2.193 \times 10^{-18}$ ,  $p=1.000$ . C)  
1089 Representative photos of P3 cortices after IUE at E15.5. According to a two-way repeated  
1090 measures ANOVA, Adnp shRNA neurons had no significant differences in percentage of cells in

1091 each cortical zone compared to Scramble shRNA neurons  $F(4, 12) = 8.371 \times 10^{-17}$ ,  $p = 1.000$ . Scale

1092 bars =  $100\mu\text{m}$ . (3 independent experiments from 3 different litters).

1093

1094



## 1095 **References**

- 1096 1. Reese D, Drapeau P. Neurite growth patterns leading to functional synapses in an  
1097 identified embryonic neuron. *The Journal of neuroscience : the official journal of the Society for*  
1098 *Neuroscience*. 1998;18(15):5652-62. PubMed PMID: 9671656; PMCID: PMC6793058.
- 1099 2. Yi G, Wang J, Wei X, Deng B. Dendritic Properties Control Energy Efficiency of Action  
1100 Potentials in Cortical Pyramidal Cells. *Front Cell Neurosci*. 2017;11:265. Epub 2017/09/01. doi:  
1101 10.3389/fncel.2017.00265. PubMed PMID: 28919852; PMCID: PMC5585200.
- 1102 3. Bradke F, Dotti CG. Establishment of neuronal polarity: lessons from cultured  
1103 hippocampal neurons. *Current opinion in neurobiology*. 2000;10(5):574-81. doi: 10.1016/s0959-  
1104 4388(00)00124-0. PubMed PMID: 11084319.
- 1105 4. da Silva JS, Dotti CG. Breaking the neuronal sphere: regulation of the actin cytoskeleton  
1106 in neuritogenesis. *Nat Rev Neurosci*. 2002;3(9):694-704. doi: 10.1038/nrn918. PubMed PMID:  
1107 12209118.
- 1108 5. Dotti CG, Sullivan CA, Banker GA. The establishment of polarity by hippocampal neurons  
1109 in culture. *The Journal of neuroscience : the official journal of the Society for Neuroscience*.  
1110 1988;8(4):1454-68. PubMed PMID: 3282038; PMCID: PMC6569279.
- 1111 6. Craig AM, Banker G. Neuronal polarity. *Annual review of neuroscience*. 1994;17:267-310.  
1112 doi: 10.1146/annurev.ne.17.030194.001411. PubMed PMID: 8210176.
- 1113 7. Bennison SA, Blazejewski SM, Smith TH, Toyo-Oka K. Protein kinases: master regulators  
1114 of neuritogenesis and therapeutic targets for axon regeneration. *Cellular and molecular life*  
1115 *sciences : CMLS*. 2019. Epub 2019/10/28. doi: 10.1007/s00018-019-03336-6. PubMed PMID:  
1116 31659414.
- 1117 8. Cornell B, Wachi T, Zhukarev V, Toyo-Oka K. Regulation of neuronal morphogenesis by  
1118 14-3-3epsilon (Ywhae) via the microtubule binding protein, doublecortin. *Human molecular*  
1119 *genetics*. 2016;25(20):4405-18. Epub 2017/02/09. doi: 10.1093/hmg/ddw270. PubMed PMID:  
1120 28173130.
- 1121 9. Zhang S-X, Duan L-H, Qian H, Yu X. Actin Aggregations Mark the Sites of Neurite Initiation.  
1122 *Neuroscience Bulletin*. 2016;32(1):1-15. doi: 10.1007/s12264-016-0012-2. PubMed PMID:  
1123 PMC5563755.
- 1124 10. Zhang S-X, Duan L-H, He S-J, Zhuang G-F, Yu X. Phosphatidylinositol 3,4-bisphosphate  
1125 regulates neurite initiation and dendrite morphogenesis via actin aggregation. *Cell research*.  
1126 2017;27(2):253-73. Epub 01/20. doi: 10.1038/cr.2017.13. PubMed PMID: 28106075.
- 1127 11. Dehmelt L, Halpain S. Actin and microtubules in neurite initiation: are MAPs the missing  
1128 link? *J Neurobiol*. 2004;58(1):18-33. doi: 10.1002/neu.10284. PubMed PMID: 14598367.
- 1129 12. Dehmelt L, Nalbant P, Steffen W, Halpain S. A microtubule-based, dynein-dependent  
1130 force induces local cell protrusions: Implications for neurite initiation. *Brain Cell Biol*.  
1131 2006;35(1):39-56. Epub 2007/03/13. doi: 10.1007/s11068-006-9001-0. PubMed PMID:  
1132 17940912.
- 1133 13. Flynn KC. The cytoskeleton and neurite initiation. *Bioarchitecture*. 2013;3(4):86-109. doi:  
1134 10.4161/bioa.26259. PubMed PMID: 24002528; PMCID: PMC4201609.
- 1135 14. Lu W, Fox P, Lakonishok M, Davidson MW, Gelfand VI. Initial neurite outgrowth in  
1136 *Drosophila* neurons is driven by kinesin-powered microtubule sliding. *Current biology : CB*.

- 1137 2013;23(11):1018-23. Epub 2013/05/23. doi: 10.1016/j.cub.2013.04.050. PubMed PMID:  
1138 23707427; PMCID: PMC3676710.
- 1139 15. Hausser M, Spruston N, Stuart GJ. Diversity and dynamics of dendritic signaling. *Science*  
1140 (New York, NY). 2000;290(5492):739-44. Epub 2000/10/29. doi: 10.1126/science.290.5492.739.  
1141 PubMed PMID: 11052929.
- 1142 16. Gipson CD, Olive MF. Structural and functional plasticity of dendritic spines - root or result  
1143 of behavior? *Genes Brain Behav.* 2017;16(1):101-17. Epub 2016/10/02. doi: 10.1111/gbb.12324.  
1144 PubMed PMID: 27561549; PMCID: PMC5243184.
- 1145 17. Yuste R, Denk W. Dendritic spines as basic functional units of neuronal integration.  
1146 *Nature.* 1995;375(6533):682-4. doi: 10.1038/375682a0. PubMed PMID: 7791901.
- 1147 18. Ozeki Y, Tomoda T, Kleiderlein J, Kamiya A, Bord L, Fujii K, Okawa M, Yamada N, Hatten  
1148 ME, Snyder SH, Ross CA, Sawa A. Disrupted-in-Schizophrenia-1 (DISC-1): mutant truncation  
1149 prevents binding to NudE-like (NUDEL) and inhibits neurite outgrowth. *Proceedings of the*  
1150 *National Academy of Sciences of the United States of America.* 2003;100(1):289-94. Epub  
1151 2002/12/31. doi: 10.1073/pnas.0136913100. PubMed PMID: 12506198; PMCID: PMC140954.
- 1152 19. Murtomaki S, Risteli J, Risteli L, Koivisto UM, Johansson S, Liesi P. Laminin and its neurite  
1153 outgrowth-promoting domain in the brain in Alzheimer's disease and Down's syndrome patients.  
1154 *Journal of neuroscience research.* 1992;32(2):261-73. Epub 1992/06/01. doi:  
1155 10.1002/jnr.490320216. PubMed PMID: 1404496.
- 1156 20. Bakos J, Bacova Z, Grant SG, Castejon AM, Ostatnikova D. Are Molecules Involved in  
1157 Neuritogenesis and Axon Guidance Related to Autism Pathogenesis? *Neuromolecular medicine.*  
1158 2015;17(3):297-304. Epub 2015/05/21. doi: 10.1007/s12017-015-8357-7. PubMed PMID:  
1159 25989848.
- 1160 21. Lepagnol-Bestel AM, Maussion G, Boda B, Cardona A, Iwayama Y, Delezoide AL, Moalic  
1161 JM, Muller D, Dean B, Yoshikawa T, Gorwood P, Buxbaum JD, Ramoz N, Simonneau M. SLC25A12  
1162 expression is associated with neurite outgrowth and is upregulated in the prefrontal cortex of  
1163 autistic subjects. *Molecular psychiatry.* 2008;13(4):385-97. Epub 2008/01/09. doi:  
1164 10.1038/sj.mp.4002120. PubMed PMID: 18180767.
- 1165 22. Gozes I. Activity-dependent neuroprotective protein: from gene to drug candidate.  
1166 *Pharmacology & therapeutics.* 2007;114(2):146-54. Epub 2007/03/17. doi:  
1167 10.1016/j.pharmthera.2007.01.004. PubMed PMID: 17363064.
- 1168 23. Van Dijck A, Vulto-van Silfhout AT, Cappuyns E, van der Werf IM, Mancini GM, Tzschach  
1169 A, Bernier R, Gozes I, Eichler EE, Romano C, Lindstrand A, Nordgren A, Kvarnung M, Kleefstra T,  
1170 de Vries BBA, Kury S, Rosenfeld JA, Meuwissen ME, Vandeweyer G, Kooy RF. Clinical Presentation  
1171 of a Complex Neurodevelopmental Disorder Caused by Mutations in ADNP. *Biol Psychiatry.*  
1172 2019;85(4):287-97. Epub 2018/05/05. doi: 10.1016/j.biopsych.2018.02.1173. PubMed PMID:  
1173 29724491; PMCID: PMC6139063.
- 1174 24. Levine J, Cohen D, Herman C, Verloes A, Guinchat V, Diaz L, Cravero C, Mandel A, Gozes I.  
1175 Developmental Phenotype of the Rare Case of DJ Caused by a Unique ADNP Gene De Novo  
1176 Mutation. *Journal of molecular neuroscience : MN.* 2019;68(3):321-30. Epub 2019/05/28. doi:  
1177 10.1007/s12031-019-01333-9. PubMed PMID: 31127536.
- 1178 25. Ivashko-Pachima Y, Hadar A, Grigg I, Korenková V, Kapitansky O, Karmon G, Gershovits M,  
1179 Sayas CL, Kooy RF, Attems J, Gurwitz D, Gozes I. Discovery of autism/intellectual disability somatic  
1180 mutations in Alzheimer's brains: mutated ADNP cytoskeletal impairments and repair as a case

- 1181 study. *Molecular psychiatry*. 2019. Epub 2019/10/31. doi: 10.1038/s41380-019-0563-5. PubMed  
1182 PMID: 31664177.
- 1183 26. Gozes I, Van Dijck A, Hacoheh-Kleiman G, Grigg I, Karmon G, Giladi E, Eger M, Gabet Y,  
1184 Pasmanik-Chor M, Cappuyns E, Elpeleg O, Kooy RF, Bedrosian-Sermone S. Premature primary  
1185 tooth eruption in cognitive/motor-delayed ADNP-mutated children. *Transl Psychiatry*.  
1186 2017;7(7):e1166. Epub 2017/07/05. doi: 10.1038/tp.2017.128. PubMed PMID: 28675391;  
1187 PMCID: PMC5538113.
- 1188 27. Gozes I, Patterson MC, Van Dijck A, Kooy RF, Peeden JN, Eichenberger JA, Zawacki-  
1189 Downing A, Bedrosian-Sermone S. The Eight and a Half Year Journey of Undiagnosed AD: Gene  
1190 Sequencing and Funding of Advanced Genetic Testing Has Led to Hope and New Beginnings. *Front*  
1191 *Endocrinol (Lausanne)*. 2017;8:107. Epub 2017/06/06. doi: 10.3389/fendo.2017.00107. PubMed  
1192 PMID: 28579975; PMCID: PMC5437153.
- 1193 28. Gozes I, Helmoortel C, Vandeweyer G, Van der Aa N, Kooy F, Bedrosian-Sermone S. The  
1194 Compassionate Side of Neuroscience: Tony Sermone's Undiagnosed Genetic Journey--ADNP  
1195 Mutation. *Journal of molecular neuroscience : MN*. 2015;56(4):751-7. Epub 2015/07/15. doi:  
1196 10.1007/s12031-015-0586-6. PubMed PMID: 26168855.
- 1197 29. Vulih-Shultzman I, Pinhasov A, Mandel S, Grigoriadis N, Touloumi O, Pittel Z, Gozes I.  
1198 Activity-dependent neuroprotective protein snippet NAP reduces tau hyperphosphorylation and  
1199 enhances learning in a novel transgenic mouse model. *J Pharmacol Exp Ther*. 2007;323(2):438-  
1200 49. Epub 2007/08/28. doi: 10.1124/jpet.107.129551. PubMed PMID: 17720885.
- 1201 30. Pascual M, Guerri C. The peptide NAP promotes neuronal growth and differentiation  
1202 through extracellular signal-regulated protein kinase and Akt pathways, and protects neurons co-  
1203 cultured with astrocytes damaged by ethanol. *Journal of neurochemistry*. 2007;103(2):557-68.  
1204 Epub 2007/07/12. doi: 10.1111/j.1471-4159.2007.04761.x. PubMed PMID: 17623041.
- 1205 31. Smith-Swintosky VL, Gozes I, Breneman DE, D'Andrea MR, Plata-Salaman CR. Activity-  
1206 dependent neurotrophic factor-9 and NAP promote neurite outgrowth in rat hippocampal and  
1207 cortical cultures. *Journal of molecular neuroscience : MN*. 2005;25(3):225-38. Epub 2005/04/01.  
1208 doi: 10.1385/jmn:25:3:225. PubMed PMID: 15800376.
- 1209 32. Ivashko-Pachima Y, Sayas CL, Malishkevich A, Gozes I. ADNP/NAP dramatically increase  
1210 microtubule end-binding protein-Tau interaction: a novel avenue for protection against  
1211 tauopathy. *Molecular psychiatry*. 2017;22(9):1335-44. Epub 2017/01/25. doi:  
1212 10.1038/mp.2016.255. PubMed PMID: 28115743.
- 1213 33. Ivashko-Pachima Y, Maor-Nof M, Gozes I. NAP (davunetide) preferential interaction with  
1214 dynamic 3-repeat Tau explains differential protection in selected tauopathies. *PloS one*.  
1215 2019;14(3):e0213666. Epub 2019/03/14. doi: 10.1371/journal.pone.0213666. PubMed PMID:  
1216 30865715; PMCID: PMC6415897 Neurosciences, developing CP201 for the ADNP syndrome,  
1217 under patent protection. This does not alter our adherence to PLOS ONE policies on sharing data  
1218 and materials.
- 1219 34. Hacoheh-Kleiman G, Sragovich S, Karmon G, Gao AYL, Grigg I, Pasmanik-Chor M, Le A,  
1220 Korenkova V, McKinney RA, Gozes I. Activity-dependent neuroprotective protein deficiency  
1221 models synaptic and developmental phenotypes of autism-like syndrome. *The Journal of clinical*  
1222 *investigation*. 2018;128(11):4956-69. Epub 2018/08/15. doi: 10.1172/jci98199. PubMed PMID:  
1223 30106381; PMCID: PMC6205398.

- 1224 35. Oz S, Kapitansky O, Ivashco-Pachima Y, Malishkevich A, Giladi E, Skalka N, Rosin-Arbesfeld  
1225 R, Mittelman L, Segev O, Hirsch JA, Gozes I. The NAP motif of activity-dependent neuroprotective  
1226 protein (ADNP) regulates dendritic spines through microtubule end binding proteins. *Molecular*  
1227 *psychiatry*. 2014;19(10):1115-24. Epub 2014/09/03. doi: 10.1038/mp.2014.97. PubMed PMID:  
1228 25178163.
- 1229 36. Magen I, Gozes I. Microtubule-stabilizing peptides and small molecules protecting axonal  
1230 transport and brain function: focus on davunetide (NAP). *Neuropeptides*. 2013;47(6):489-95.  
1231 Epub 2013/11/12. doi: 10.1016/j.npep.2013.10.011. PubMed PMID: 24210139.
- 1232 37. Mandel S, Spivak-Pohis I, Gozes I. ADNP differential nucleus/cytoplasm localization in  
1233 neurons suggests multiple roles in neuronal differentiation and maintenance. *Journal of*  
1234 *molecular neuroscience : MN*. 2008;35(2):127-41. Epub 2008/02/21. doi: 10.1007/s12031-007-  
1235 9013-y. PubMed PMID: 18286385.
- 1236 38. Gennet N, Herden C, Bubb VJ, Quinn JP, Kipar A. Expression of activity-dependent  
1237 neuroprotective protein in the brain of adult rats. *Histol Histopathol*. 2008;23(3):309-17. Epub  
1238 2007/12/12. doi: 10.14670/hh-23.309. PubMed PMID: 18072088.
- 1239 39. Sasaki R, Aoki S, Yamato M, Uchiyama H, Wada K, Ogiuchi H, Okano T, Ando T. A protocol  
1240 for immunofluorescence staining of floating neurospheres. *Neuroscience letters*.  
1241 2010;479(2):126-7. Epub 2010/05/21. doi: 10.1016/j.neulet.2010.05.042. PubMed PMID:  
1242 20493924.
- 1243 40. Wachi T, Cornell B, Marshall C, Zhukarev V, Baas PW, Toyo-oka K. Ablation of the 14-3-  
1244 3gamma Protein Results in Neuronal Migration Delay and Morphological Defects in the  
1245 Developing Cerebral Cortex. *Dev Neurobiol*. 2016;76(6):600-14. Epub 2015/08/25. doi:  
1246 10.1002/dneu.22335. PubMed PMID: 26297819.
- 1247 41. Cornell B, Wachi T, Zhukarev V, Toyo-Oka K. Overexpression of the 14-3-3gamma protein  
1248 in embryonic mice results in neuronal migration delay in the developing cerebral cortex.  
1249 *Neuroscience letters*. 2016;628:40-6. Epub 2016/06/07. doi: 10.1016/j.neulet.2016.06.009.  
1250 PubMed PMID: 27288018.
- 1251 42. Risher WC, Ustunkaya T, Singh Alvarado J, Eroglu C. Rapid Golgi analysis method for  
1252 efficient and unbiased classification of dendritic spines. *PloS one*. 2014;9(9):e107591. Epub  
1253 2014/09/10. doi: 10.1371/journal.pone.0107591. PubMed PMID: 25208214; PMCID:  
1254 PMC4160288.
- 1255 43. Hammond L. Measuring cell fluorescence using imageJ. *The Open Lab Book: QBI, The*  
1256 *University of Queensland, Australia; 2014 [cited 2020 Monday, April 13th, 2020]. Available from:*  
1257 [https://theolb.readthedocs.io/en/latest/imaging/measuring-cell-fluorescence-using-](https://theolb.readthedocs.io/en/latest/imaging/measuring-cell-fluorescence-using-imagej.html)  
1258 [imagej.html](https://theolb.readthedocs.io/en/latest/imaging/measuring-cell-fluorescence-using-imagej.html).
- 1259 44. Chen T-W, Wardill TJ, Sun Y, Pulver SR, Renninger SL, Baohan A, Schreiter ER, Kerr RA,  
1260 Orger MB, Jayaraman V, Looger LL, Svoboda K, Kim DS. Ultra-sensitive fluorescent proteins for  
1261 imaging neuronal activity. *Nature*. 2013;499(7458):295-300. doi: 10.1038/nature12354. PubMed  
1262 PMID: PMC3777791.
- 1263 45. Bassan M, Zamostiano R, Davidson A, Pinhasov A, Giladi E, Perl O, Bassan H, Blat C, Gibney  
1264 G, Glazner G, Brenneman DE, Gozes I. Complete Sequence of a Novel Protein Containing a  
1265 Femtomolar-Activity-Dependent Neuroprotective Peptide. *Journal of neurochemistry*.  
1266 1999;72(3):1283-93. doi: 10.1046/j.1471-4159.1999.0721283.x.

- 1267 46. Witte H, Bradke F. The role of the cytoskeleton during neuronal polarization. *Current*  
1268 *opinion in neurobiology*. 2008;18(5):479-87. Epub 2008/10/22. doi: 10.1016/j.conb.2008.09.019.  
1269 PubMed PMID: 18929658.
- 1270 47. Taniguchi Y, Young-Pearse T, Sawa A, Kamiya A. In utero electroporation as a tool for  
1271 genetic manipulation in vivo to study psychiatric disorders: from genes to circuits and behaviors.  
1272 *The Neuroscientist : a review journal bringing neurobiology, neurology and psychiatry*.  
1273 2012;18(2):169-79. Epub 2011/05/10. doi: 10.1177/1073858411399925. PubMed PMID:  
1274 21551077; PMCID: PMC3530425.
- 1275 48. Ye H, Tan YL, Ponniah S, Takeda Y, Wang SQ, Schachner M, Watanabe K, Pallen CJ, Xiao  
1276 ZC. Neural recognition molecules CHL1 and NB-3 regulate apical dendrite orientation in the  
1277 neocortex via PTP alpha. *Embo j*. 2008;27(1):188-200. Epub 2007/11/30. doi:  
1278 10.1038/sj.emboj.7601939. PubMed PMID: 18046458; PMCID: PMC2206121.
- 1279 49. Kinoshita N, Huang AJY, McHugh TJ, Suzuki SC, Masai I, Kim IH, Soderling SH, Miyawaki A,  
1280 Shimogori T. Genetically Encoded Fluorescent Indicator GRAPHIC Delineates Intercellular  
1281 Connections. *iScience*. 2019;15:28-38. Epub 2019/04/27. doi: 10.1016/j.isci.2019.04.013.  
1282 PubMed PMID: 31026667; PMCID: PMC6482341.
- 1283 50. Kroon T, van Hugte E, van Linge L, Mansvelder HD, Meredith RM. Early postnatal  
1284 development of pyramidal neurons across layers of the mouse medial prefrontal cortex. *Sci Rep*.  
1285 2019;9(1):5037. Epub 2019/03/27. doi: 10.1038/s41598-019-41661-9. PubMed PMID: 30911152;  
1286 PMCID: PMC6433913.
- 1287 51. Mandel S, Gozes I. Activity-dependent neuroprotective protein constitutes a novel  
1288 element in the SWI/SNF chromatin remodeling complex. *The Journal of biological chemistry*.  
1289 2007;282(47):34448-56. Epub 2007/09/18. doi: 10.1074/jbc.M704756200. PubMed PMID:  
1290 17878164.
- 1291 52. Mandel S, Rechavi G, Gozes I. Activity-dependent neuroprotective protein (ADNP)  
1292 differentially interacts with chromatin to regulate genes essential for embryogenesis. *Dev Biol*.  
1293 2007;303(2):814-24. Epub 2006/12/01. doi: 10.1016/j.ydbio.2006.11.039. PubMed PMID:  
1294 17222401.
- 1295 53. Oz S, Ivashko-Pachima Y, Gozes I. The ADNP derived peptide, NAP modulates the tubulin  
1296 pool: implication for neurotrophic and neuroprotective activities. *PloS one*. 2012;7(12):e51458-  
1297 e. Epub 2012/12/14. doi: 10.1371/journal.pone.0051458. PubMed PMID: 23272107.
- 1298 54. Cornell B, Wachi T, Zhukarev V, Toyo-Oka K. Regulation of neuronal morphogenesis by  
1299 14-3-3epsilon (Ywhae) via the microtubule binding protein, doublecortin. *Human molecular*  
1300 *genetics*. 2016;25(20):4610. Epub 2017/02/06. doi: 10.1093/hmg/ddx023. PubMed PMID:  
1301 28158563.
- 1302 55. Cornell B, Toyo-Oka K. 14-3-3 Proteins in Brain Development: Neurogenesis, Neuronal  
1303 Migration and Neuromorphogenesis. *Front Mol Neurosci*. 2017;10:318-. doi:  
1304 10.3389/fnmol.2017.00318. PubMed PMID: 29075177.
- 1305 56. Li XS, Wu HT, Yu Y, Chen GY, Qin XY, Zheng GE, Deng W, Cheng Y. Increased serum FGF2  
1306 levels in first-episode, drug-free patients with schizophrenia. *Neuroscience letters*. 2018;686:28-  
1307 32. Epub 2018/09/03. doi: 10.1016/j.neulet.2018.08.046. PubMed PMID: 30172685.
- 1308 57. Merenlender-Wagner A, Malishkevich A, Shemer Z, Udawela M, Gibbons A, Scarr E, Dean  
1309 B, Levine J, Agam G, Gozes I. Autophagy has a key role in the pathophysiology of schizophrenia.



- 1310 Molecular psychiatry. 2015;20(1):126-32. Epub 2013/12/25. doi: 10.1038/mp.2013.174. PubMed  
1311 PMID: 24365867; PMCID: PMC4320293.
- 1312 58. Malishkevich A, Marshall GA, Schultz AP, Sperling RA, Aharon-Peretz J, Gozes I. Blood-  
1313 Borne Activity-Dependent Neuroprotective Protein (ADNP) is Correlated with Premorbid  
1314 Intelligence, Clinical Stage, and Alzheimer's Disease Biomarkers. *J Alzheimers Dis.*  
1315 2016;50(1):249-60. Epub 2015/12/08. doi: 10.3233/jad-150799. PubMed PMID: 26639975;  
1316 PMCID: PMC4712084.
- 1317 59. Routh BN, Rathour RK, Baumgardner ME, Kalmbach BE, Johnston D, Brager DH. Increased  
1318 transient Na. *The Journal of physiology.* 2017;595(13):4431-48. Epub 2017/05/23. doi:  
1319 10.1113/JP274258. PubMed PMID: 28370141; PMCID: PMC5491866.
- 1320 60. Rane P, Cochran D, Hodge SM, Haselgrove C, Kennedy DN, Frazier JA. Connectivity in  
1321 Autism: A Review of MRI Connectivity Studies. *Harv Rev Psychiatry.* 2015;23(4):223-44. doi:  
1322 10.1097/HRP.000000000000072. PubMed PMID: 26146755; PMCID: PMC5083037.
- 1323 61. Kast RJ, Levitt P. Precision in the development of neocortical architecture: From  
1324 progenitors to cortical networks. *Prog Neurobiol.* 2019;175:77-95. Epub 2019/01/21. doi:  
1325 10.1016/j.pneurobio.2019.01.003. PubMed PMID: 30677429; PMCID: PMC6402587.
- 1326 62. Pabba M, Scifo E, Kapadia F, Nikolova YS, Ma T, Mechawar N, Tseng GC, Sibille E. Resilient  
1327 protein co-expression network in male orbitofrontal cortex layer 2/3 during human aging.  
1328 *Neurobiol Aging.* 2017;58:180-90. Epub 2017/07/28. doi: 10.1016/j.neurobiolaging.2017.06.023.  
1329 PubMed PMID: 28750307; PMCID: PMC5581682.
- 1330 63. Amram N, Hacoheh-Kleiman G, Sragovich S, Malishkevich A, Katz J, Touloumi O, Lagoudaki  
1331 R, Grigoriadis NC, Giladi E, Yeheskel A, Pasmanik-Chor M, Jouroukhin Y, Gozes I. Sexual divergence  
1332 in microtubule function: the novel intranasal microtubule targeting SKIP normalizes axonal  
1333 transport and enhances memory. *Molecular psychiatry.* 2016;21(10):1467-76. Epub 2016/01/20.  
1334 doi: 10.1038/mp.2015.208. PubMed PMID: 26782054.
- 1335 64. Wu YK, Fujishima K, Kengaku M. Differentiation of apical and basal dendrites in pyramidal  
1336 cells and granule cells in dissociated hippocampal cultures. *PloS one.* 2015;10(2):e0118482. Epub  
1337 2015/02/23. doi: 10.1371/journal.pone.0118482. PubMed PMID: 25705877; PMCID:  
1338 PMC4338060.
- 1339 65. Han YM, Chan AS. Disordered cortical connectivity underlies the executive function  
1340 deficits in children with autism spectrum disorders. *Research in developmental disabilities.*  
1341 2017;61:19-31. Epub 2017/01/04. doi: 10.1016/j.ridd.2016.12.010. PubMed PMID: 28042973.
- 1342 66. Holiga S, Hipp JF, Chatham CH, Garces P, Spooren W, D'Ardhuy XL, Bertolino A, Bouquet  
1343 C, Buitelaar JK, Bours C, Rausch A, Oldehinkel M, Bouvard M, Amestoy A, Caralp M, Gueguen S,  
1344 Ly-Le Moal M, Houenou J, Beckmann CF, Loth E, Murphy D, Charman T, Tillmann J, Laidi C,  
1345 Delorme R, Beggiano A, Gaman A, Scheid I, Leboyer M, d'Albis MA, Sevigny J, Czech C, Bolognani  
1346 F, Honey GD, Dukart J. Patients with autism spectrum disorders display reproducible functional  
1347 connectivity alterations. *Sci Transl Med.* 2019;11(481). Epub 2019/03/01. doi:  
1348 10.1126/scitranslmed.aat9223. PubMed PMID: 30814340.
- 1349 67. Bhat AN, McDonald NM, Eilbott JE, Pelphrey KA. Exploring cortical activation and  
1350 connectivity in infants with and without familial risk for autism during naturalistic social  
1351 interactions: A preliminary study. *Infant behavior & development.* 2019;57:101337. Epub  
1352 2019/08/27. doi: 10.1016/j.infbeh.2019.101337. PubMed PMID: 31450025.

- 1353 68. Sragovich S, Malishkevich A, Piontkewitz Y, Giladi E, Touloumi O, Lagoudaki R, Grigoriadis  
1354 N, Gozes I. The autism/neuroprotection-linked ADNP/NAP regulate the excitatory glutamatergic  
1355 synapse. *Transl Psychiatry*. 2019;9(1):2. Epub 2019/01/22. doi: 10.1038/s41398-018-0357-6.  
1356 PubMed PMID: 30664622; PMCID: PMC6341082.
- 1357 69. Tian L, Hires SA, Mao T, Huber D, Chiappe ME, Chalasani SH, Petreanu L, Akerboom J,  
1358 McKinney SA, Schreiter ER, Bargmann CI, Jayaraman V, Svoboda K, Looger LL. Imaging neural  
1359 activity in worms, flies and mice with improved GCaMP calcium indicators. *Nat Methods*.  
1360 2009;6(12):875-81. Epub 2009/11/10. doi: 10.1038/nmeth.1398. PubMed PMID: 19898485;  
1361 PMCID: PMC2858873.
- 1362 70. Hutsler JJ, Casanova MF. Review: Cortical construction in autism spectrum disorder:  
1363 columns, connectivity and the subplate. *Neuropathology and applied neurobiology*.  
1364 2016;42(2):115-34. Epub 2015/01/30. doi: 10.1111/nan.12227. PubMed PMID: 25630827.
- 1365 71. Boivin JR, Nedivi E. Functional implications of inhibitory synapse placement on signal  
1366 processing in pyramidal neuron dendrites. *Current opinion in neurobiology*. 2018;51:16-22. Epub  
1367 2018/02/15. doi: 10.1016/j.conb.2018.01.013. PubMed PMID: 29454834.
- 1368 72. Chen Jerry L, Villa Katherine L, Cha Jae W, So Peter TC, Kubota Y, Nedivi E. Clustered  
1369 Dynamics of Inhibitory Synapses and Dendritic Spines in the Adult Neocortex. *Neuron*.  
1370 2012;74(2):361-73. doi: <https://doi.org/10.1016/j.neuron.2012.02.030>.
- 1371 73. Villa KL, Berry KP, Subramanian J, Cha JW, Oh WC, Kwon H-B, Kubota Y, So PTC, Nedivi E.  
1372 Inhibitory Synapses Are Repeatedly Assembled and Removed at Persistent Sites In Vivo. *Neuron*.  
1373 2016;89(4):756-69. doi: <https://doi.org/10.1016/j.neuron.2016.01.010>.
- 1374 74. Helsmoortel C, Vulto-van Silfhout AT, Coe BP, Vandeweyer G, Rooms L, van den Ende J,  
1375 Schuurs-Hoeijmakers JH, Marcelis CL, Willemsen MH, Vissers LE, Yntema HG, Bakshi M, Wilson  
1376 M, Witherspoon KT, Malmgren H, Nordgren A, Anneren G, Fichera M, Bosco P, Romano C, de  
1377 Vries BB, Kleefstra T, Kooy RF, Eichler EE, Van der Aa N. A SWI/SNF-related autism syndrome  
1378 caused by de novo mutations in ADNP. *Nature genetics*. 2014;46(4):380-4. Epub 2014/02/18. doi:  
1379 10.1038/ng.2899. PubMed PMID: 24531329; PMCID: PMC3990853.
- 1380 75. Ostapcuk V, Mohn F, Carl SH, Basters A, Hess D, Iesmantavicius V, Lampersberger L, Flemr  
1381 M, Pandey A, Thomä NH, Betschinger J, Bühler M. Activity-dependent neuroprotective protein  
1382 recruits HP1 and CHD4 to control lineage-specifying genes. *Nature*. 2018;557(7707):739-43. Epub  
1383 2018/05/23. doi: 10.1038/s41586-018-0153-8. PubMed PMID: 29795351.
- 1384 76. Mosch K, Franz H, Soeroes S, Singh PB, Fischle W. HP1 recruits activity-dependent  
1385 neuroprotective protein to H3K9me3 marked pericentromeric heterochromatin for silencing of  
1386 major satellite repeats. *PloS one*. 2011;6(1):e15894. Epub 2011/01/18. doi:  
1387 10.1371/journal.pone.0015894. PubMed PMID: 21267468; PMCID: PMC3022755.
- 1388 77. Blazejewski SM, Bennison SA, Smith TH, Toyo-Oka K. Neurodevelopmental Genetic  
1389 Diseases Associated With Microdeletions and Microduplications of Chromosome 17p13.3. *Front*  
1390 *Genet*. 2018;9:80. Epub 2018/03/23. doi: 10.3389/fgene.2018.00080. PubMed PMID: 29628935;  
1391 PMCID: PMC5876250.
- 1392 78. Brunet A, Kanai F, Stehn J, Xu J, Sarbassova D, Frangioni JV, Dalal SN, DeCaprio JA,  
1393 Greenberg ME, Yaffe MB. 14-3-3 transits to the nucleus and participates in dynamic  
1394 nucleocytoplasmic transport. *The Journal of cell biology*. 2002;156(5):817-28. Epub 2002/02/28.  
1395 doi: 10.1083/jcb.200112059. PubMed PMID: 11864996; PMCID: PMC2173313.

- 1396 79. Lopez-Girona A, Furnari B, Mondesert O, Russell P. Nuclear localization of Cdc25 is  
1397 regulated by DNA damage and a 14-3-3 protein. *Nature*. 1999;397(6715):172-5. Epub  
1398 1999/01/29. doi: 10.1038/16488. PubMed PMID: 9923681.
- 1399 80. Cappuyns E, Huyghebaert J, Vandeweyer G, Kooy RF. Mutations in ADNP affect expression  
1400 and subcellular localization of the protein. *Cell Cycle*. 2018;17(9):1068-75. Epub 2018/06/19. doi:  
1401 10.1080/15384101.2018.1471313. PubMed PMID: 29911927; PMCID: PMC6110598.  
1402



**A**

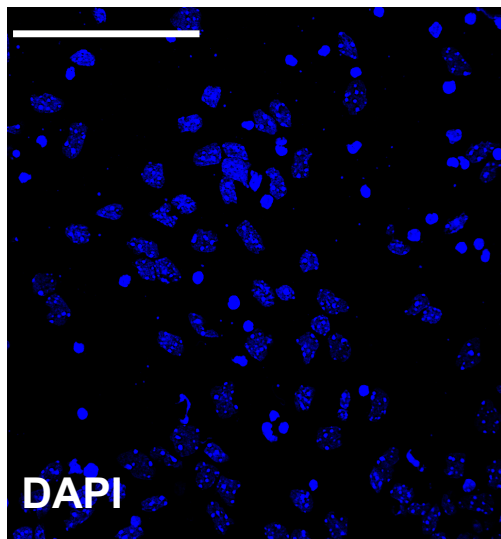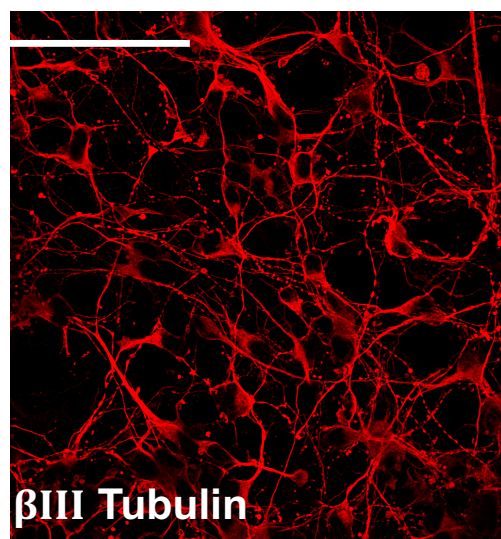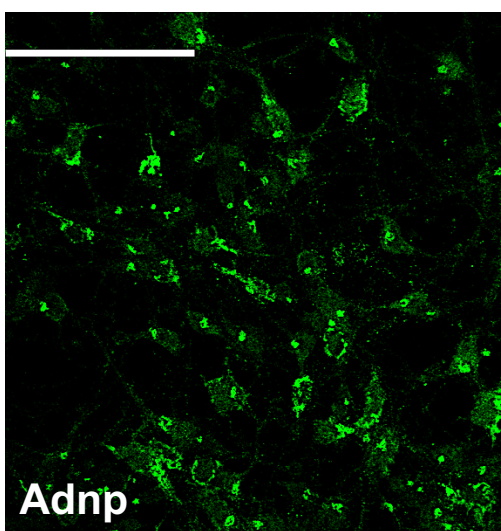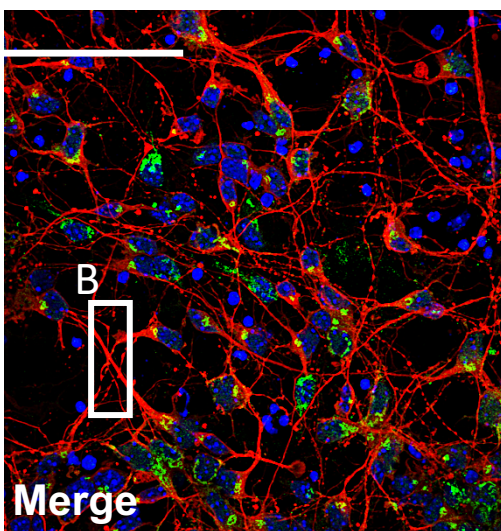

**B**

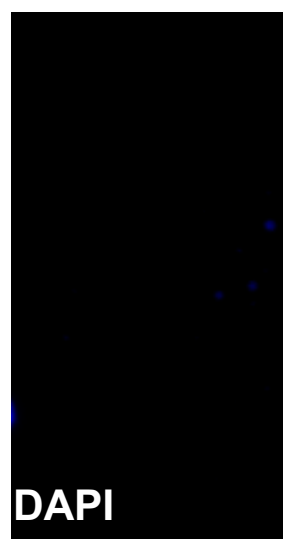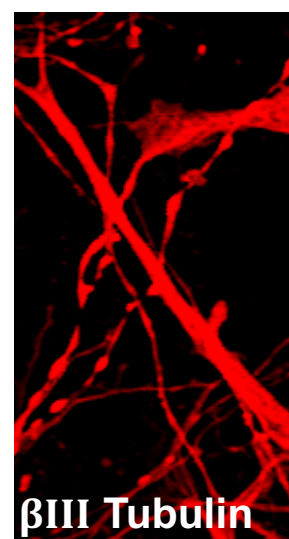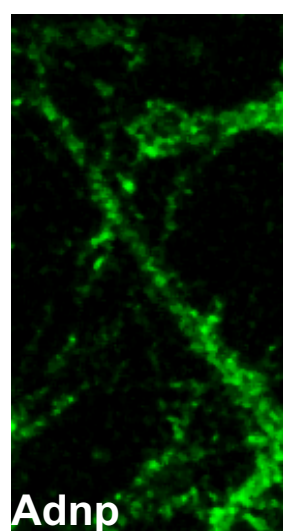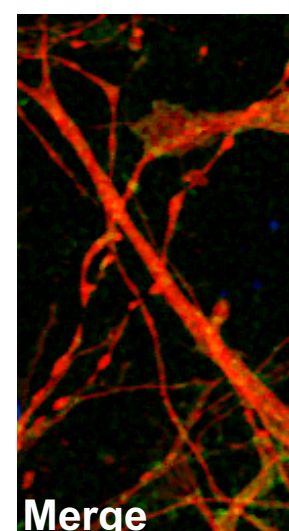

**C**

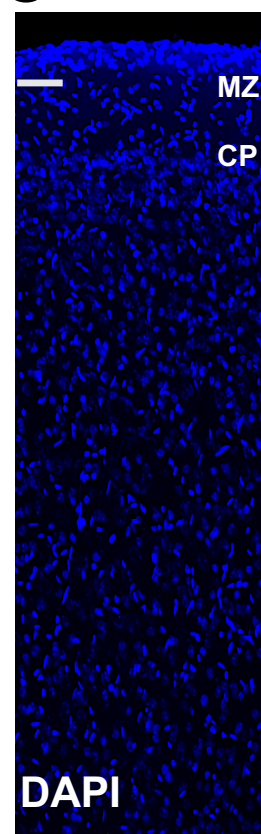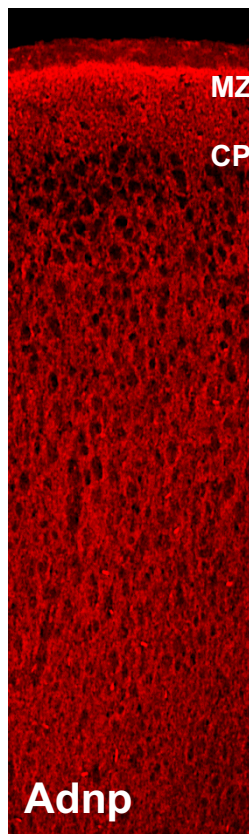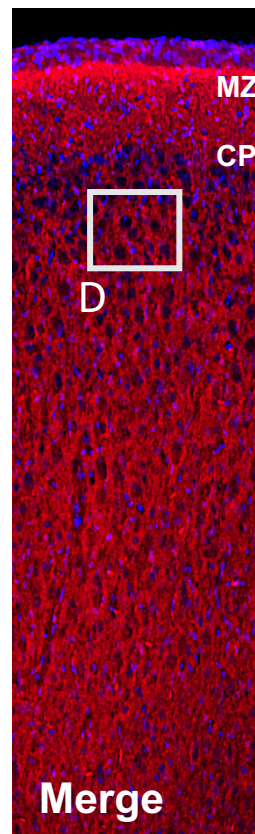

**D**

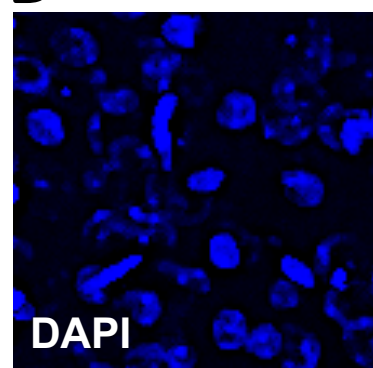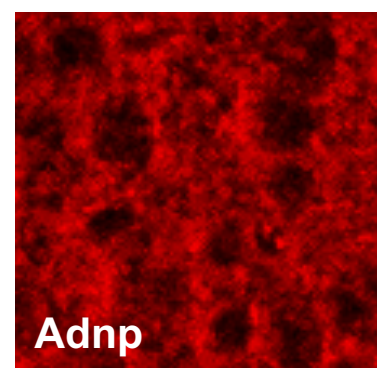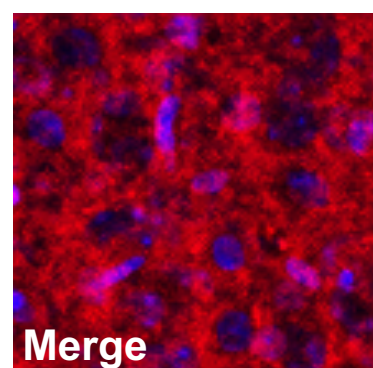

**A**

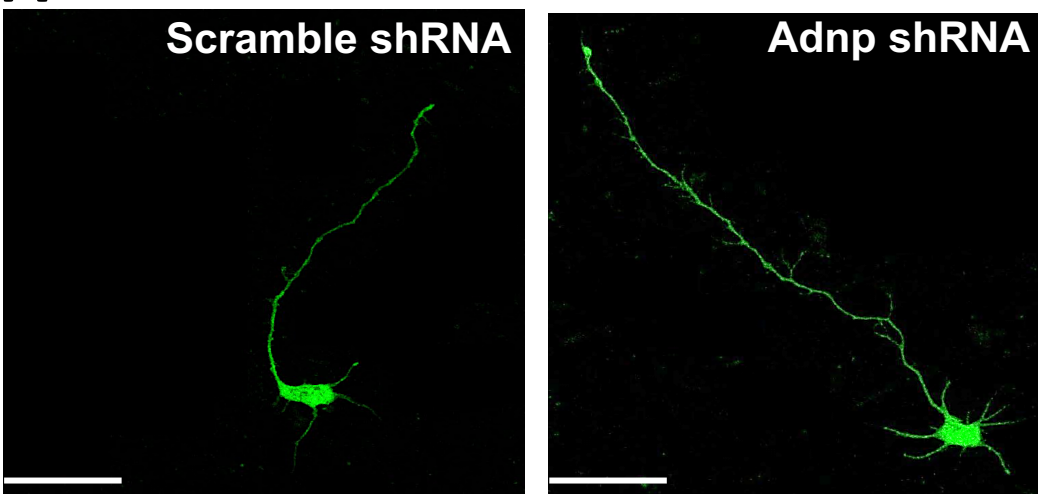

**Rescue**

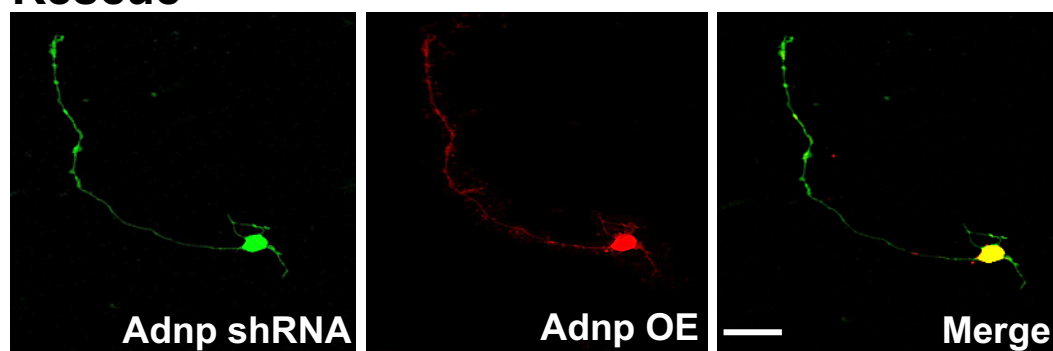

**Rescue Control**

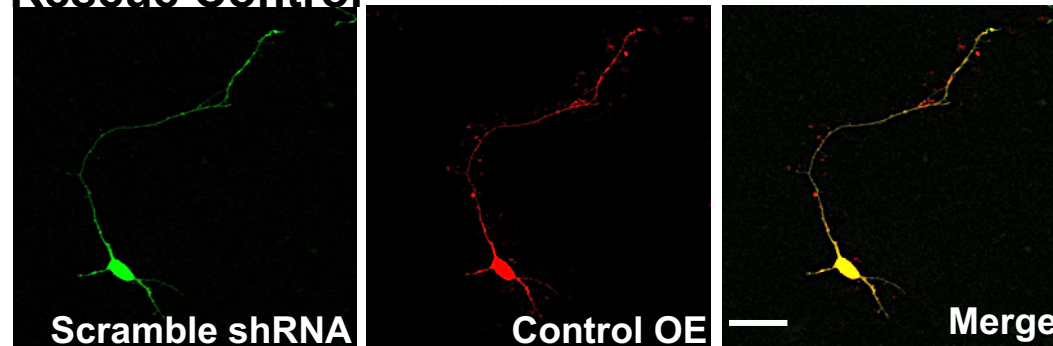

**B**

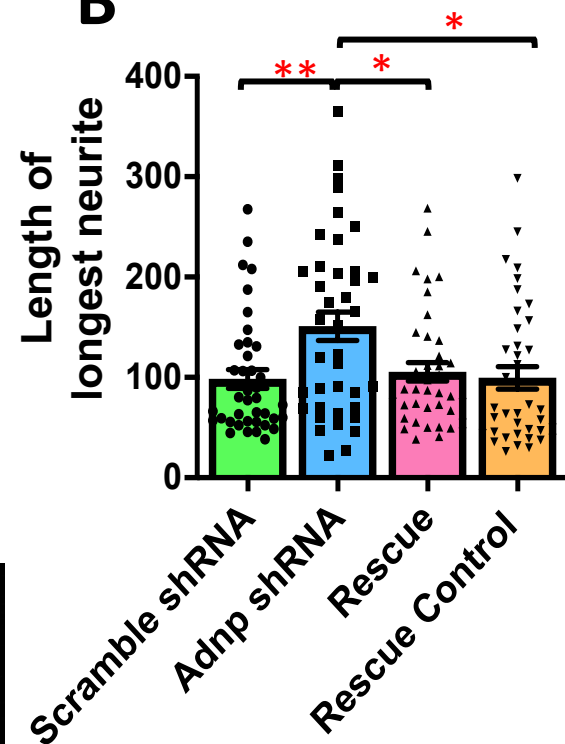

**C**

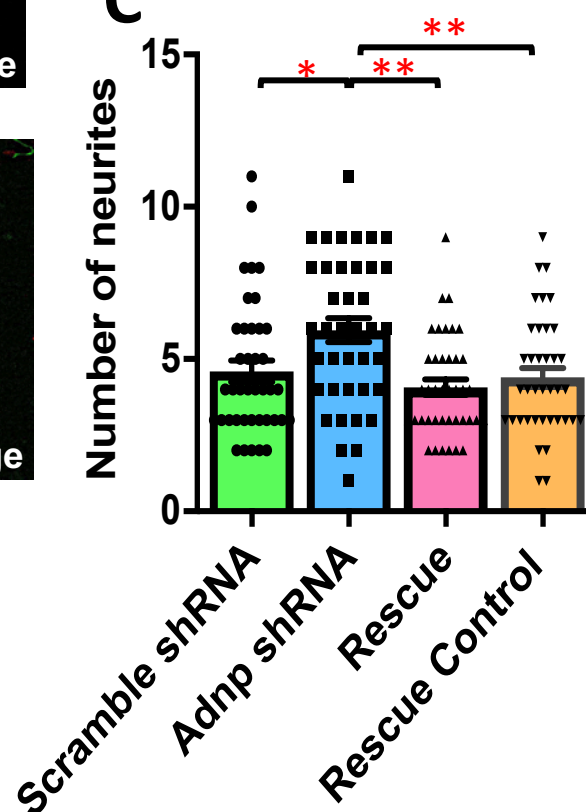

**D**

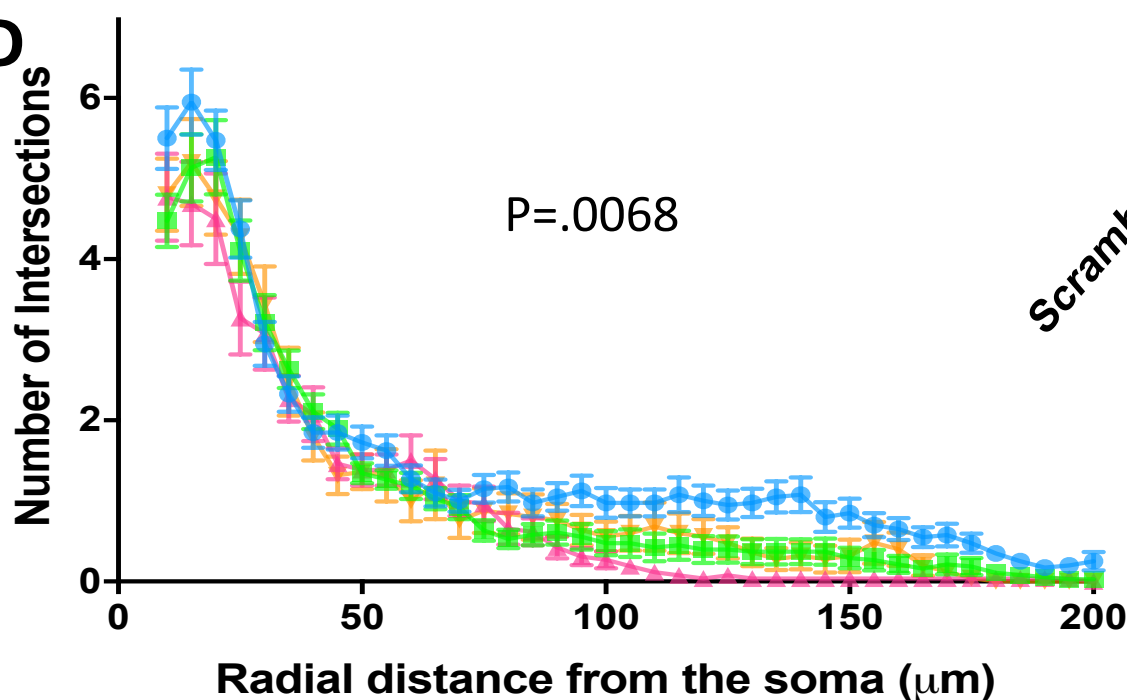

- Adnp shRNA
- Scramble shRNA
- ▲ Rescue
- ▼ Rescue Control



**A** E15.5 IUE  $\longrightarrow$  P15 Harvest

**Scramble shRNA**

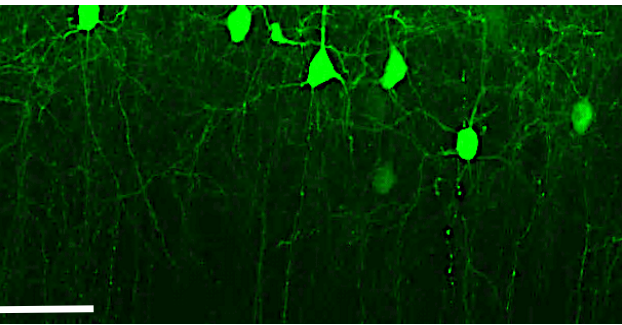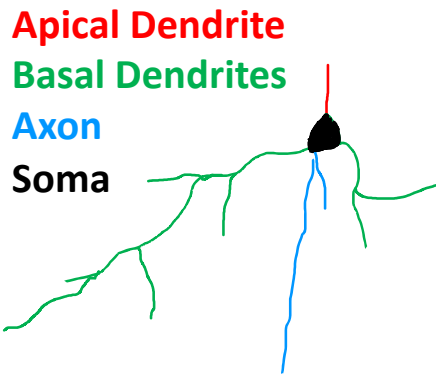

**Adnp shRNA**

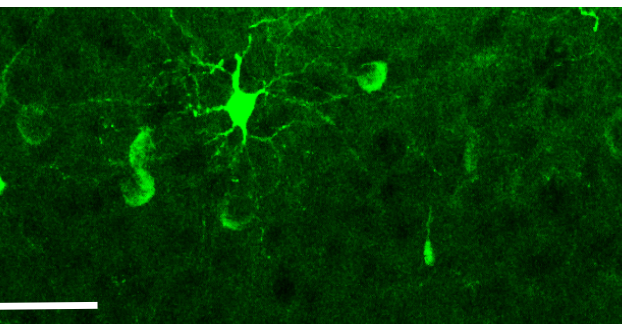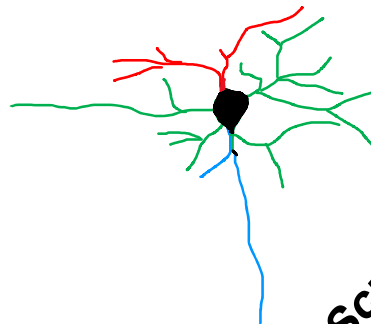

**Rescue**

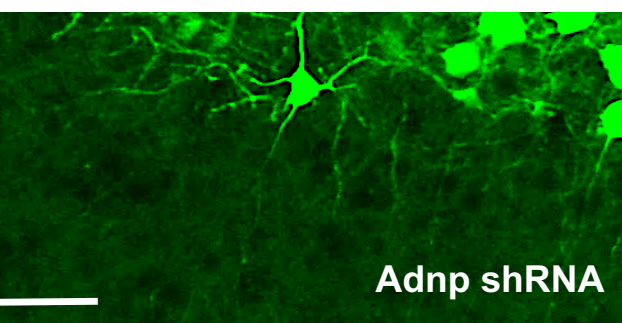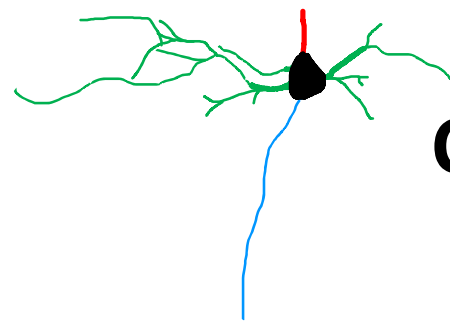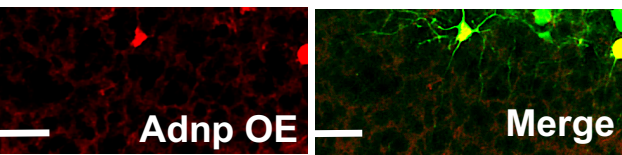

**Rescue Control**

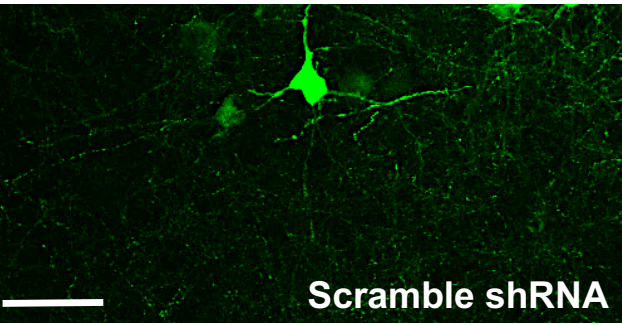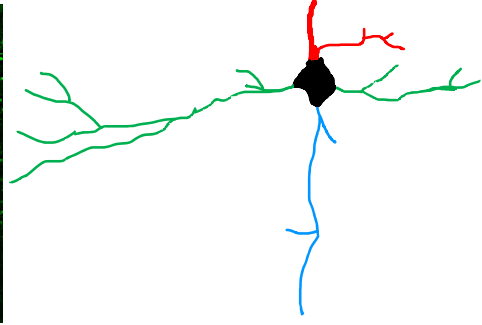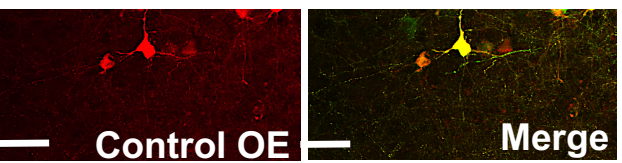

**B**

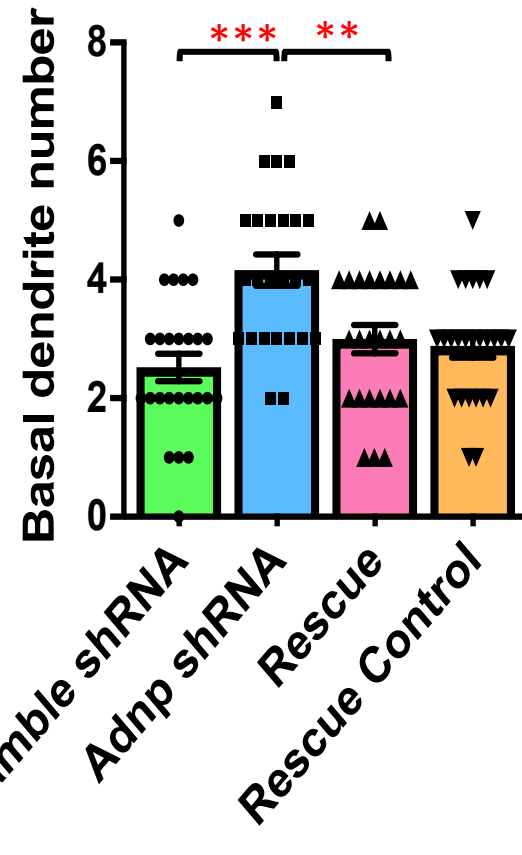

**C**

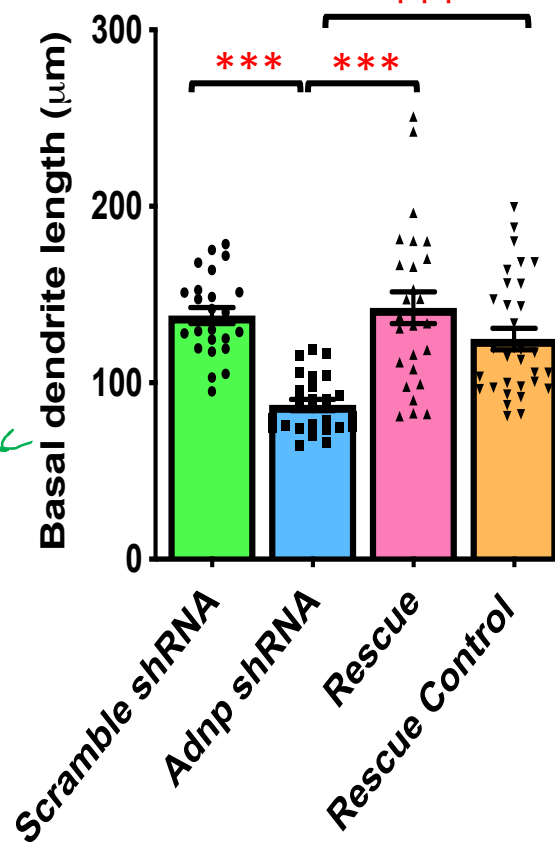

A E15.5 IUE  $\longrightarrow$  P15 Harvest

Scramble shRNA

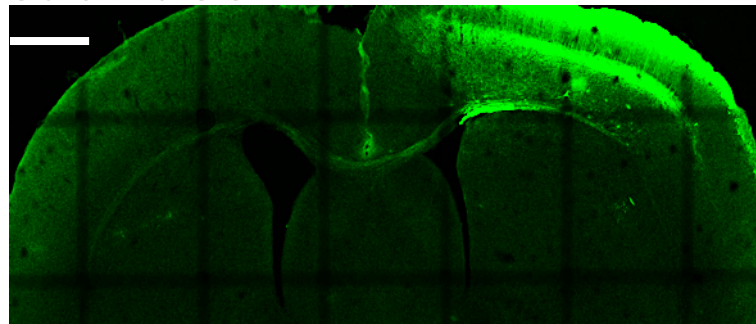

Adnp shRNA

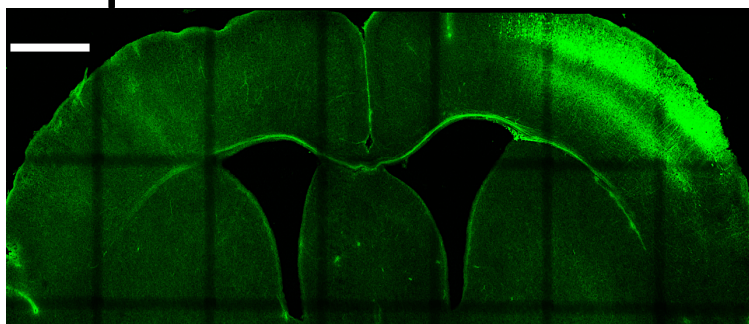

Scramble shRNA

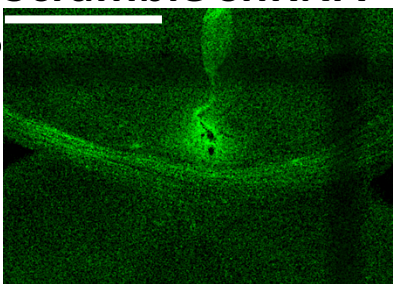

Adnp shRNA

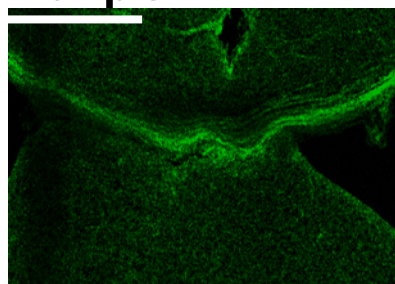

B

E

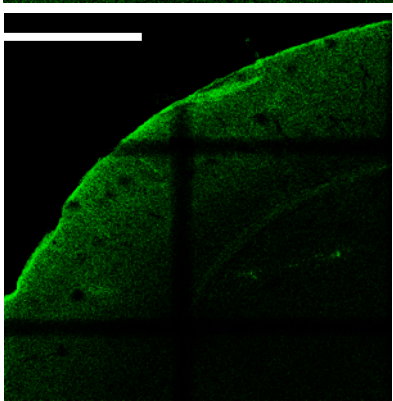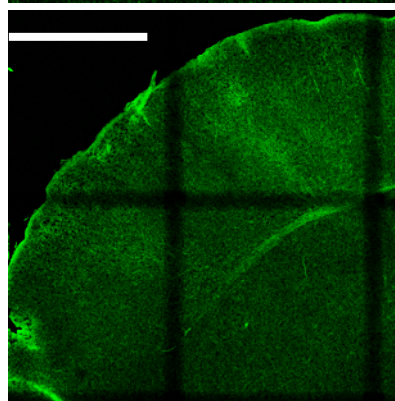

F

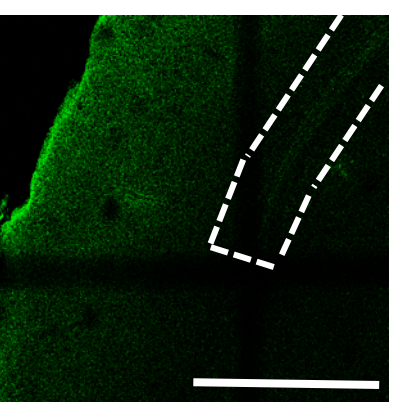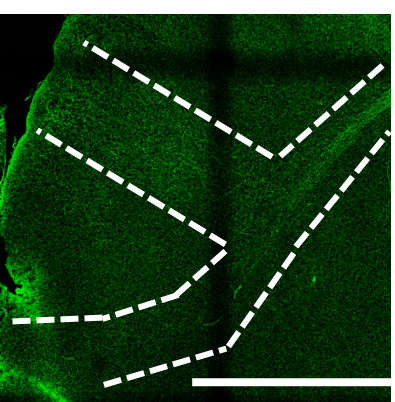

H

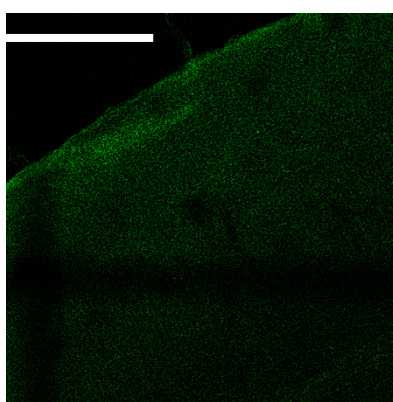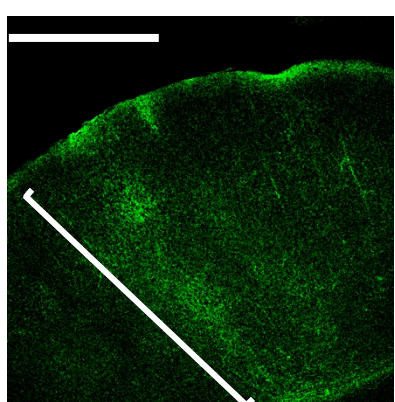

C

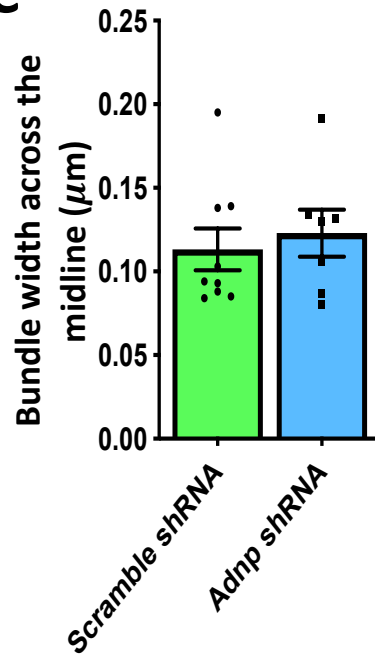

D

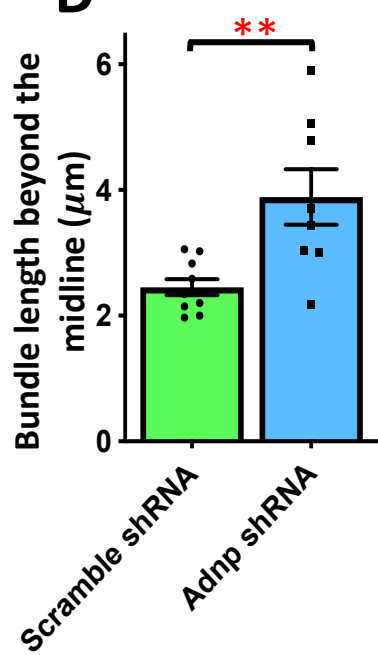

G

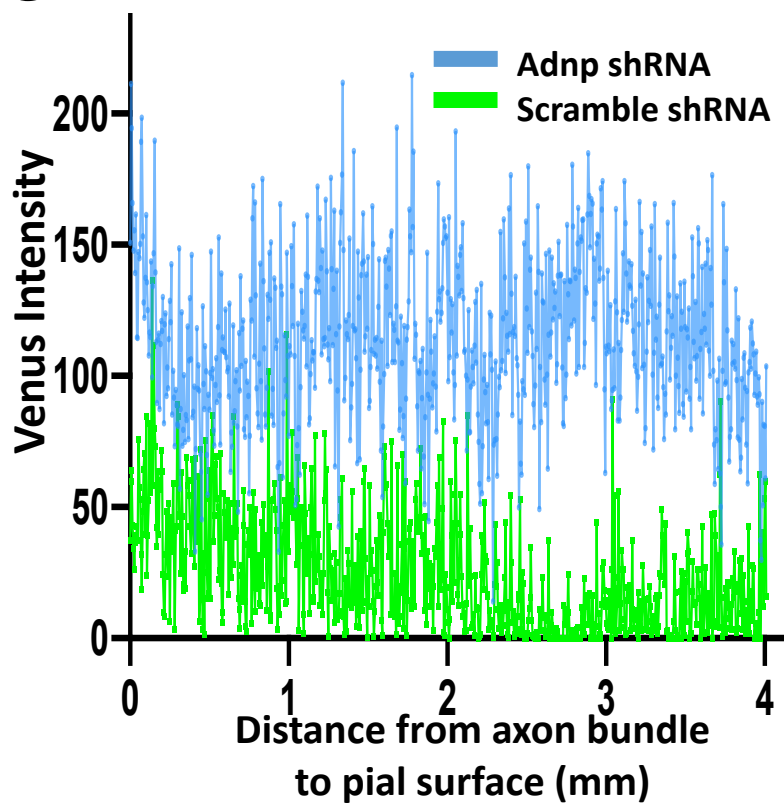



**A** E15.5 IUE  $\longrightarrow$  P3 Harvest

Wildtype

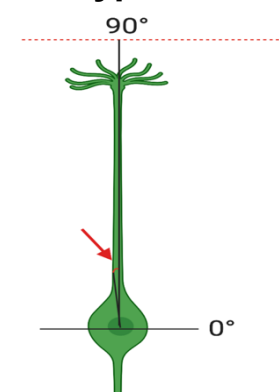

Abnormal

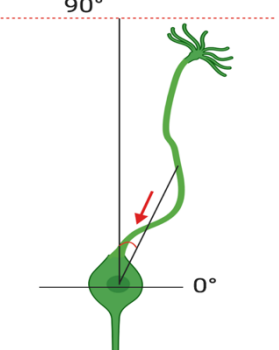

**B** Scramble shRNA

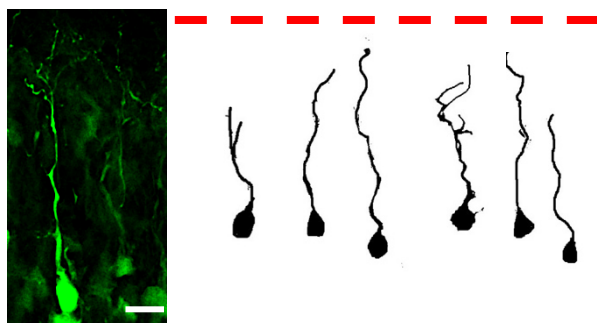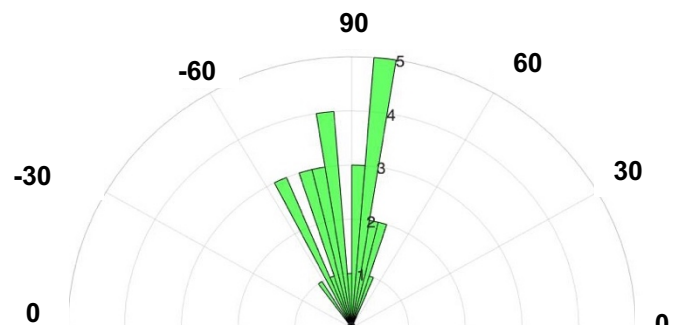

**C** Adnp shRNA

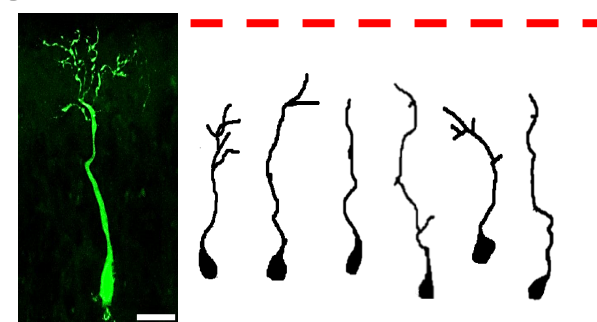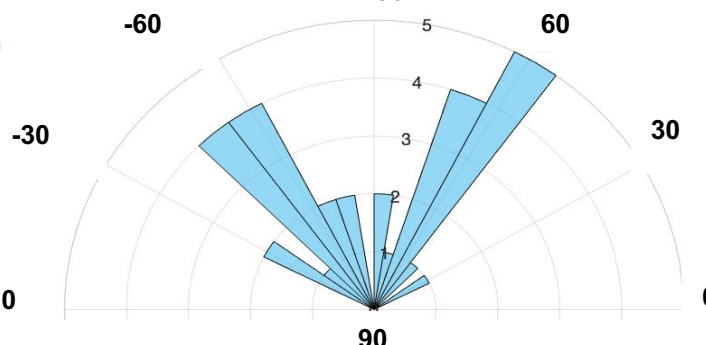

**D** Rescue

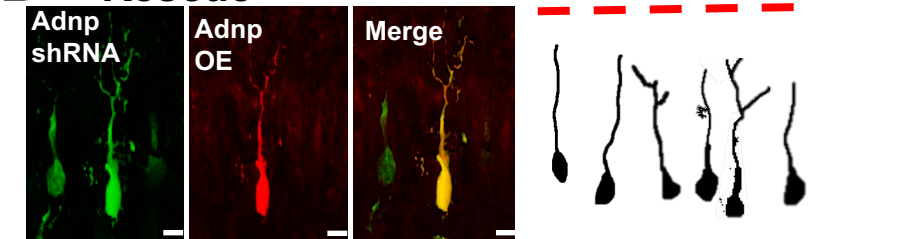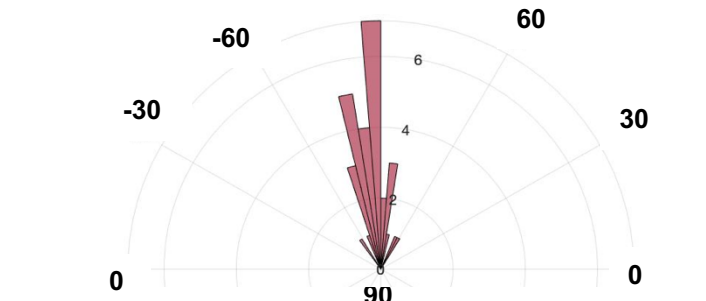

**E** Rescue Control

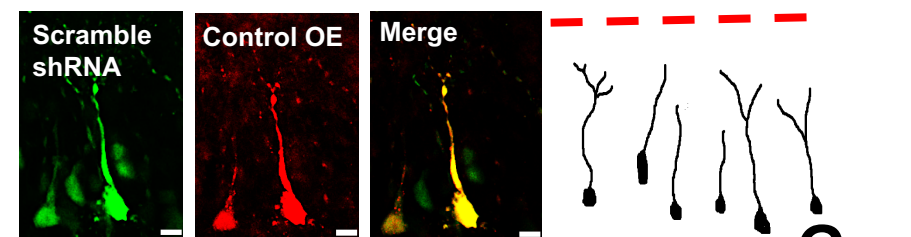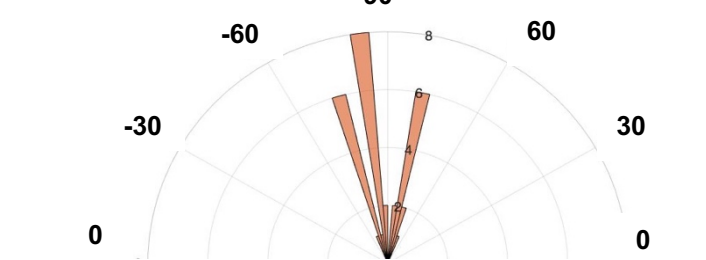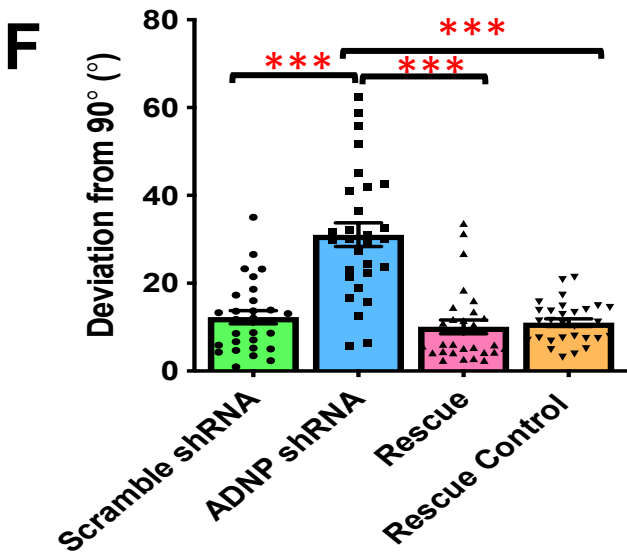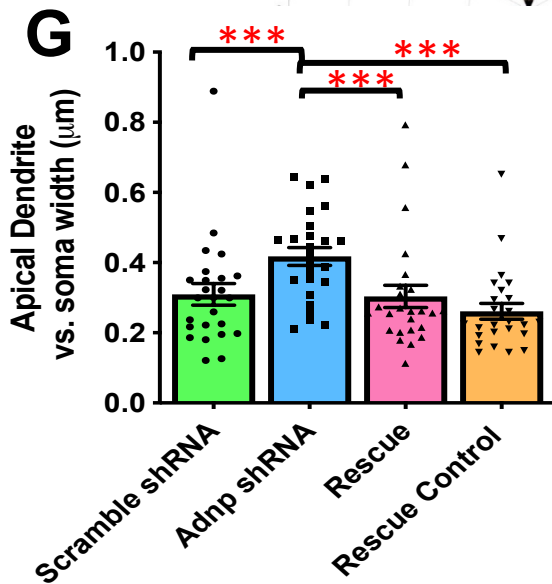

Figure 6.

E15.5 IUE → P0 Harvest

Bennison et al.

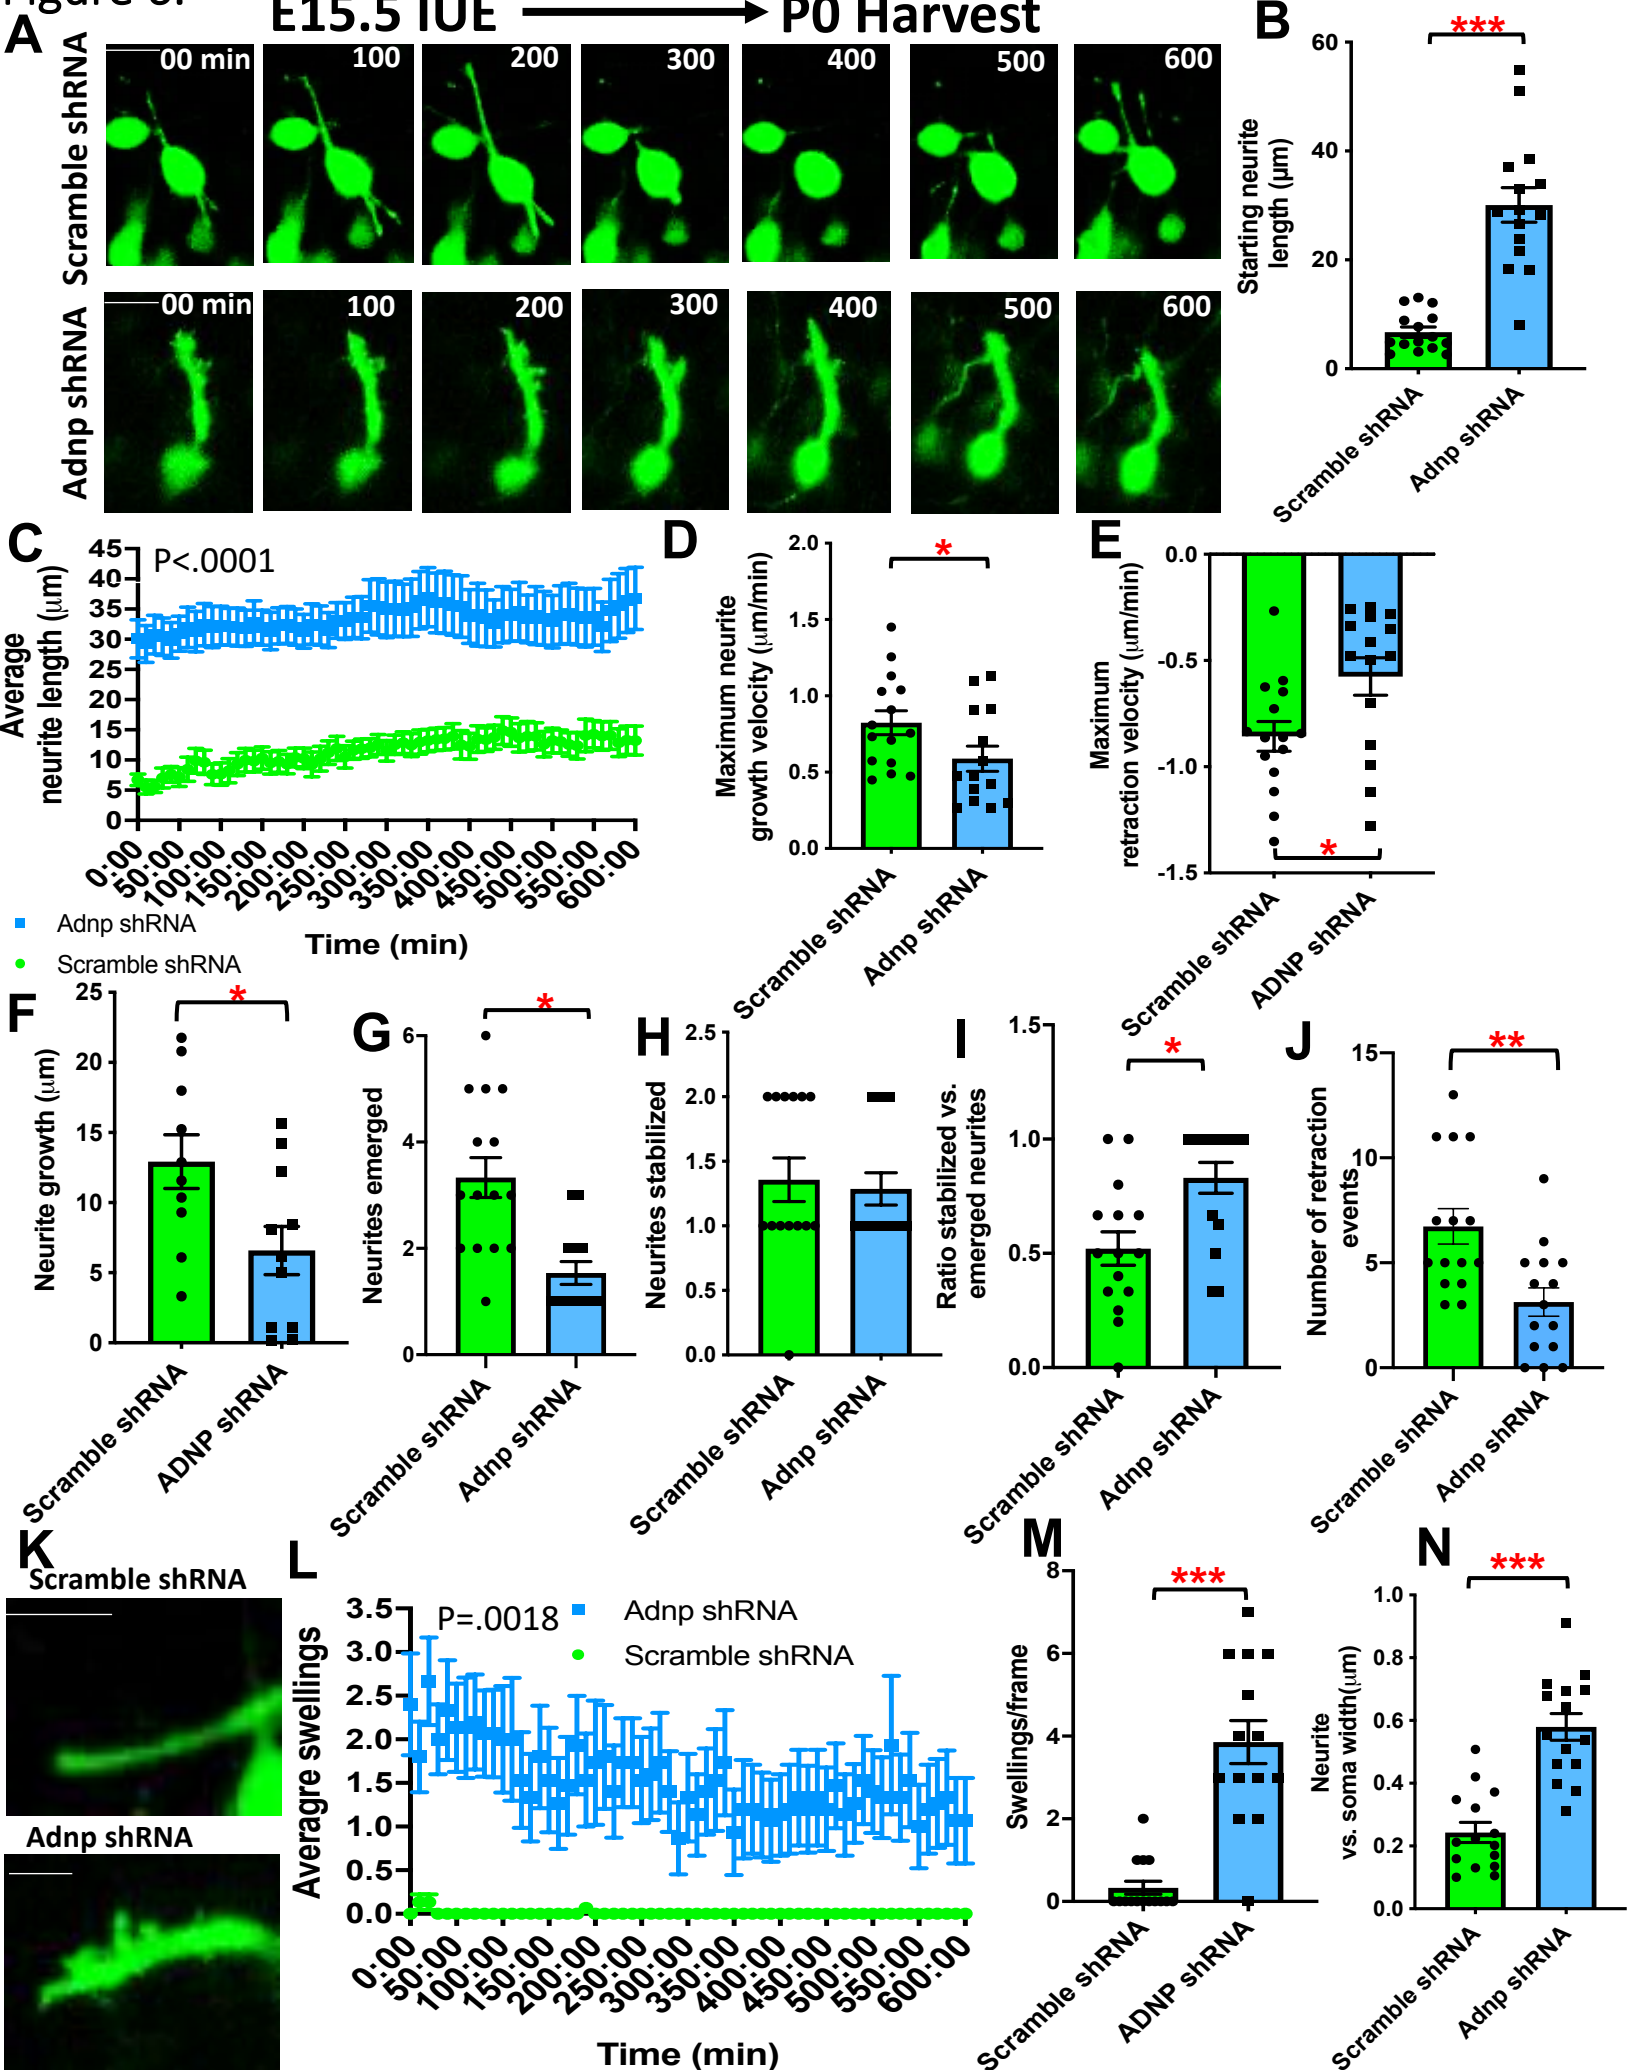

Figure 7.

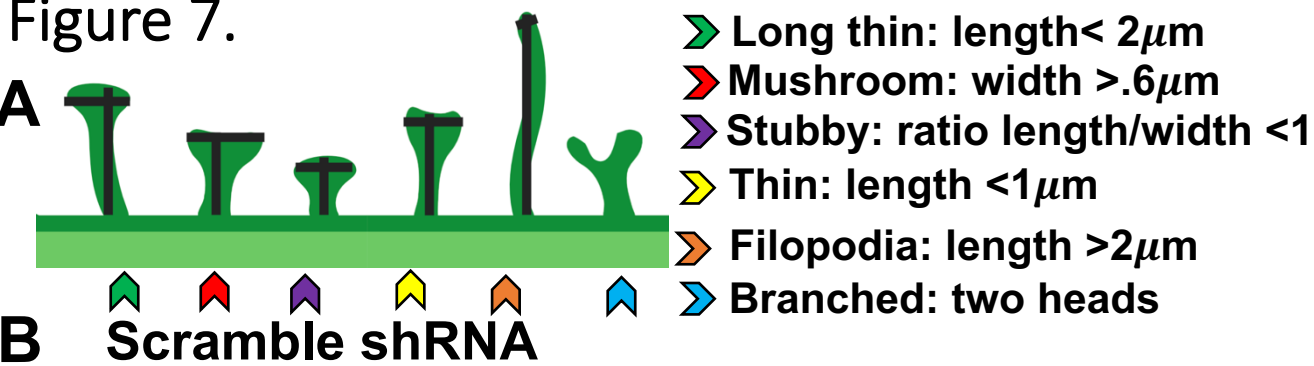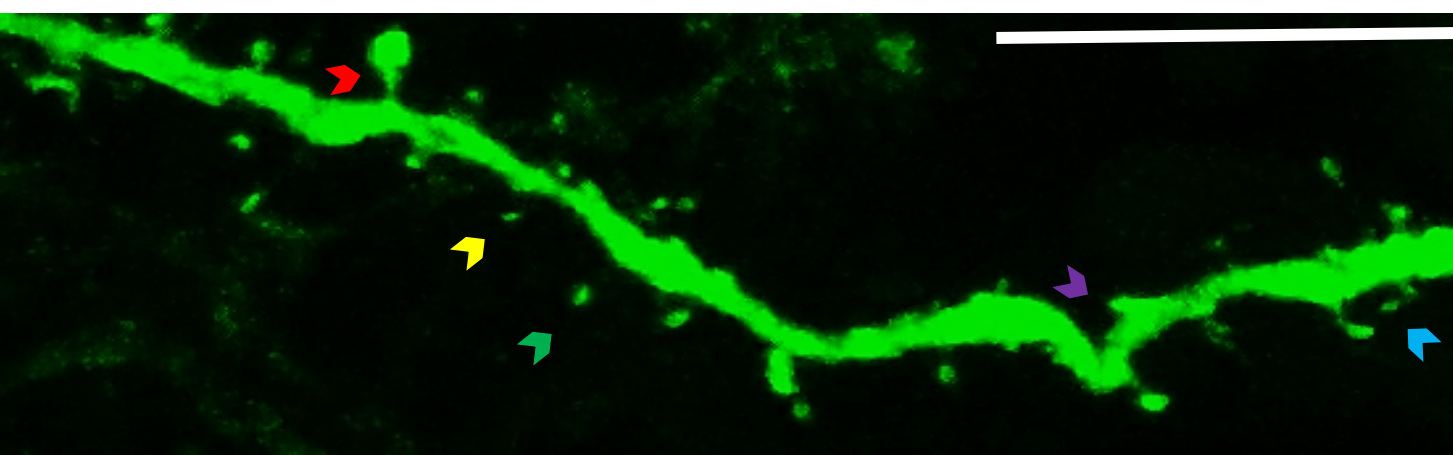

**C** Adnp shRNA

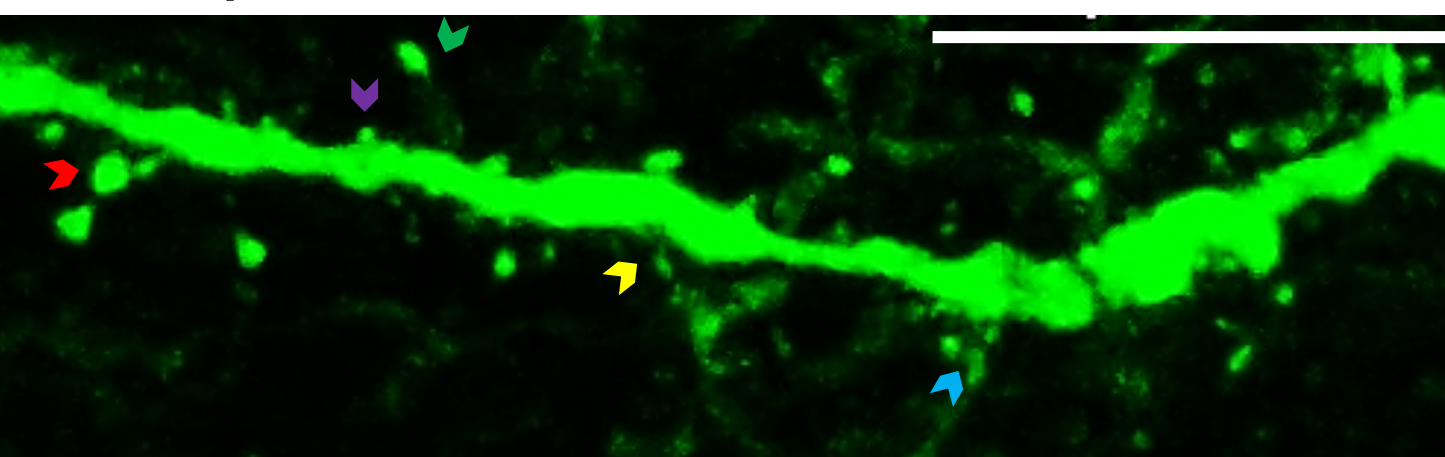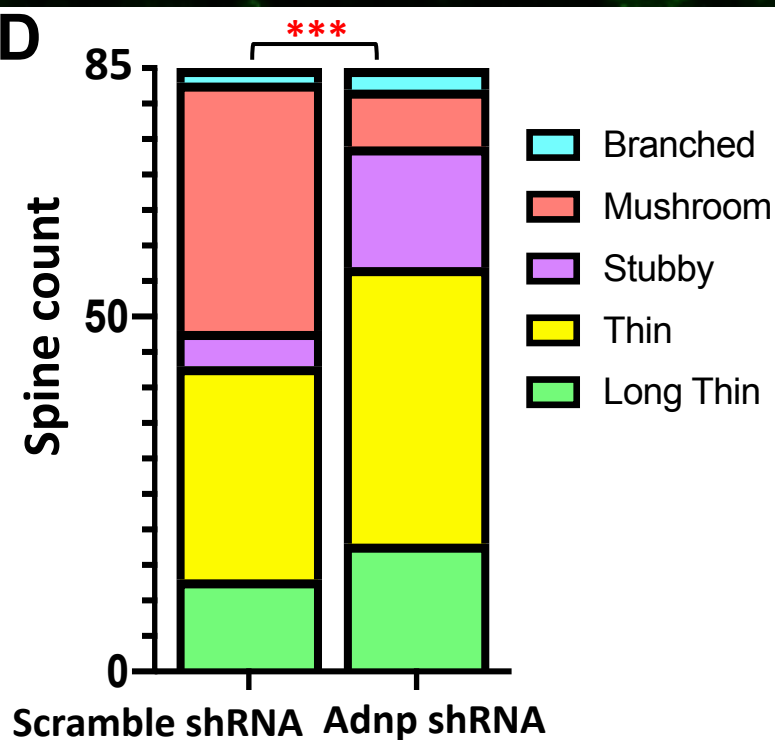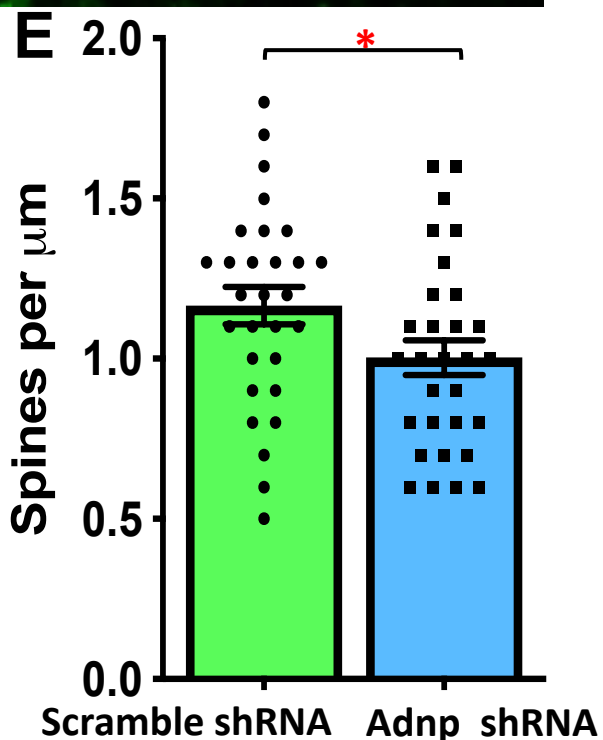

Figure 8.

**A** E15.5 IUE  $\longrightarrow$  2 Months Harvest

Scramble shRNA      Adnp shRNA

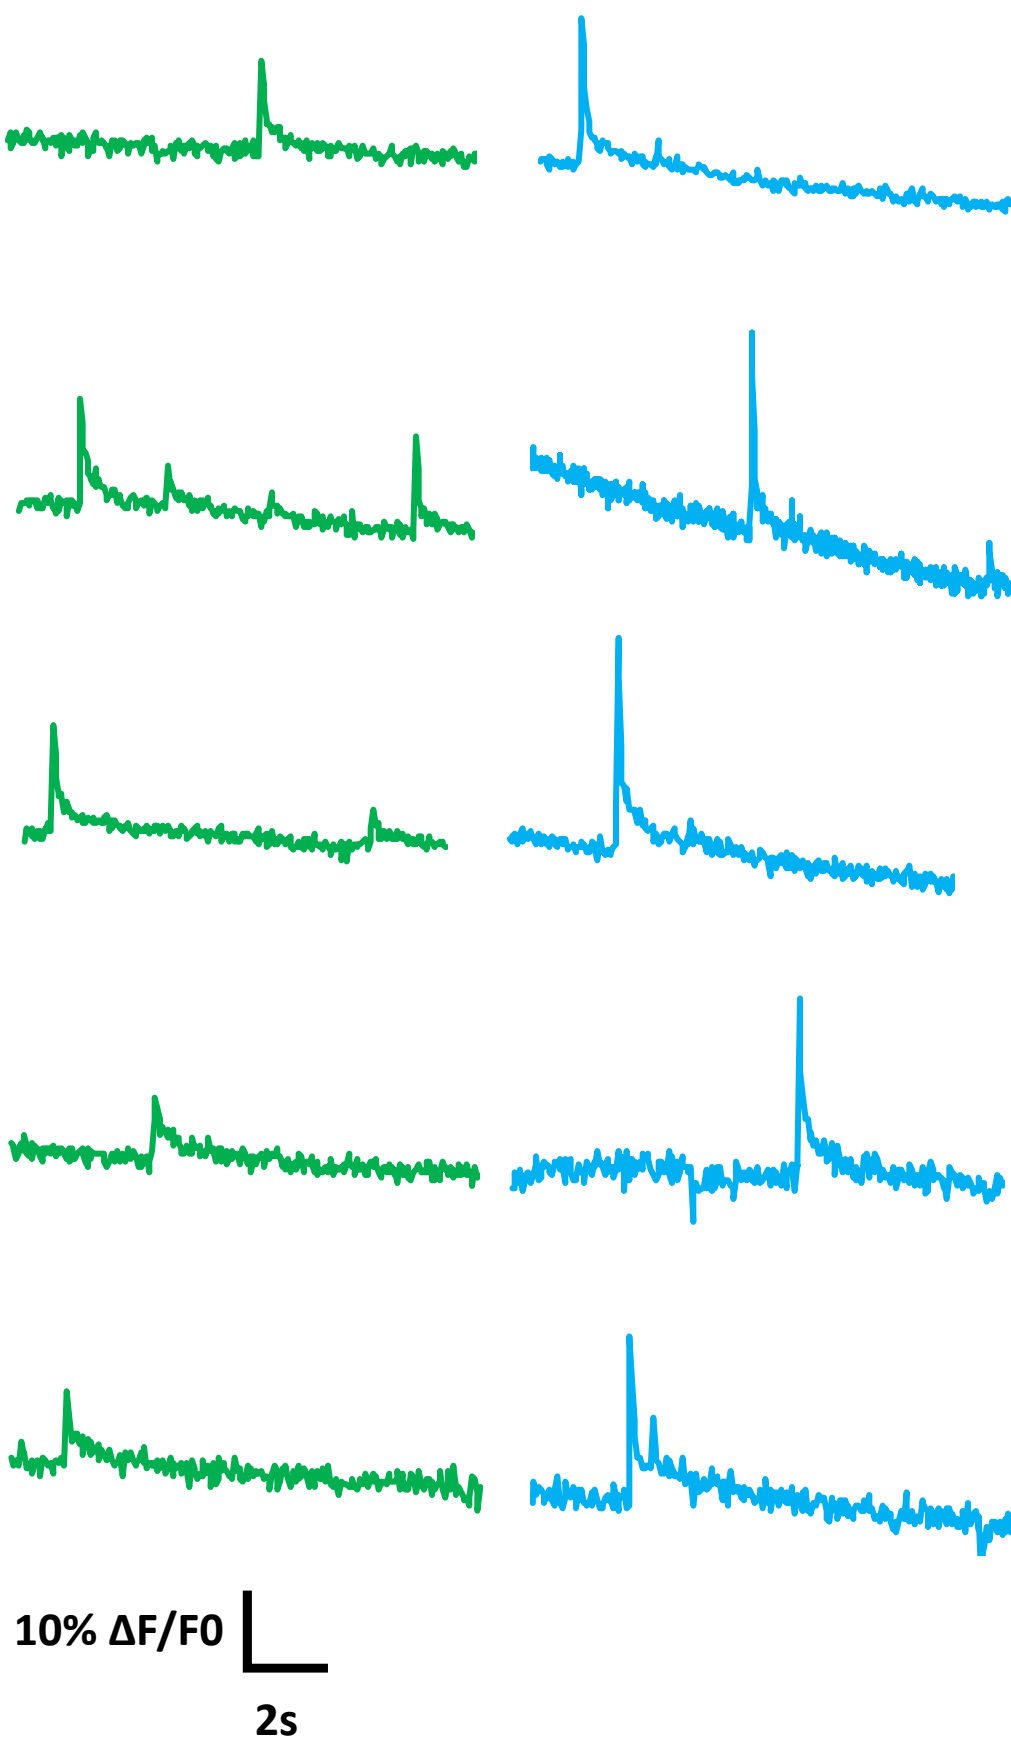

**B**

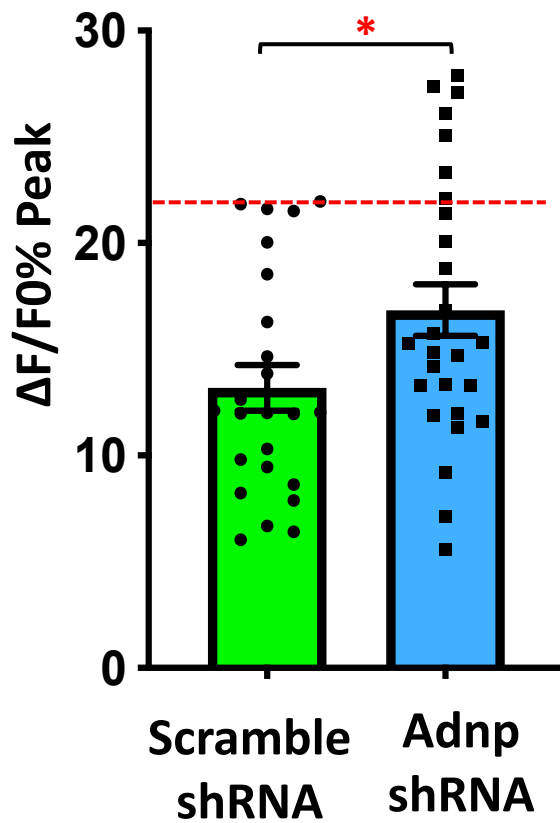

**C**

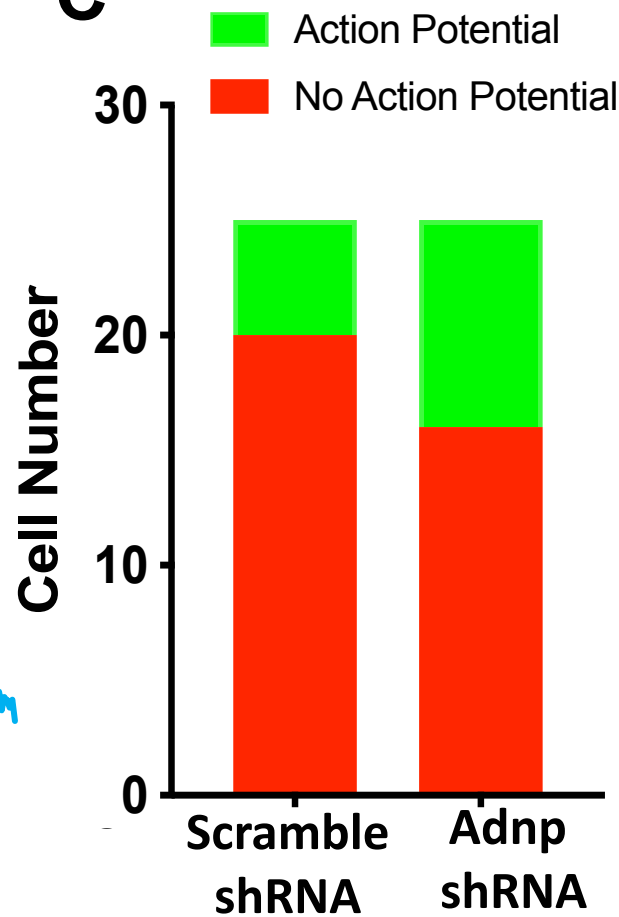



Figure 9.

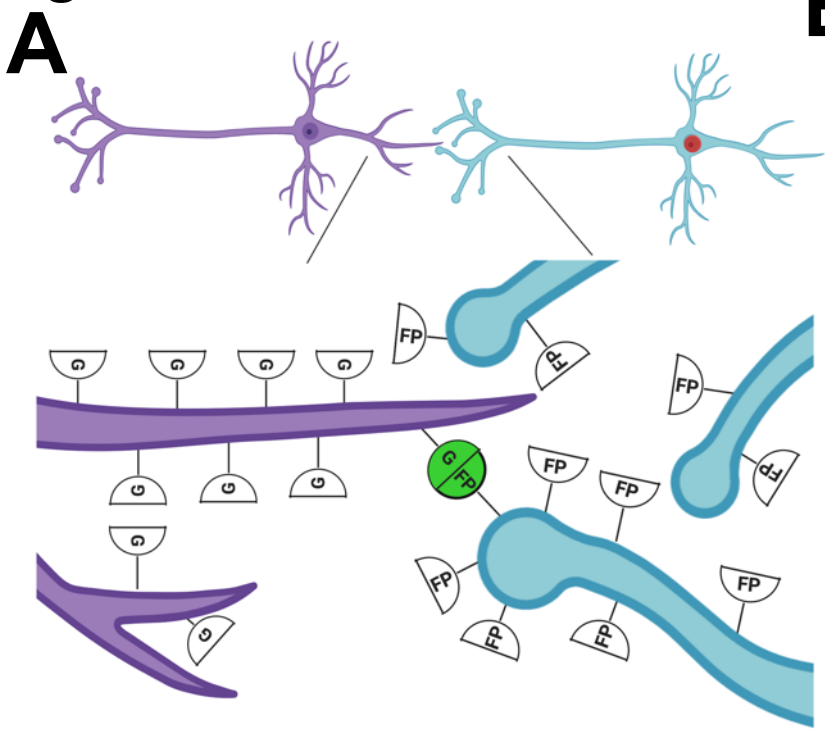

**B**

cGRAPHIC-T2A-mCherry + shRNA-mTagBFP2

nGRAPHIC-2A-H2B-mCherry + shRNA-mTagBFP2

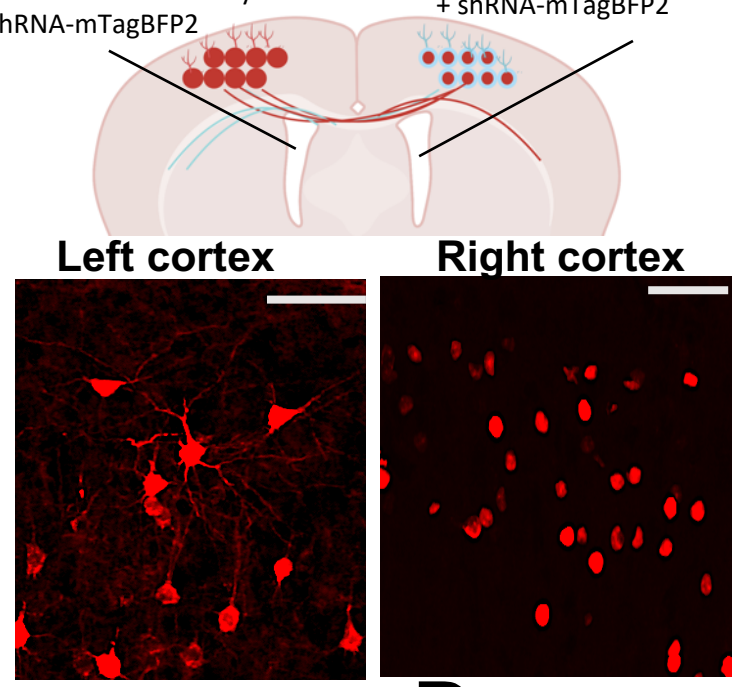

**C**

E15.5 IUE → P30 Harvest

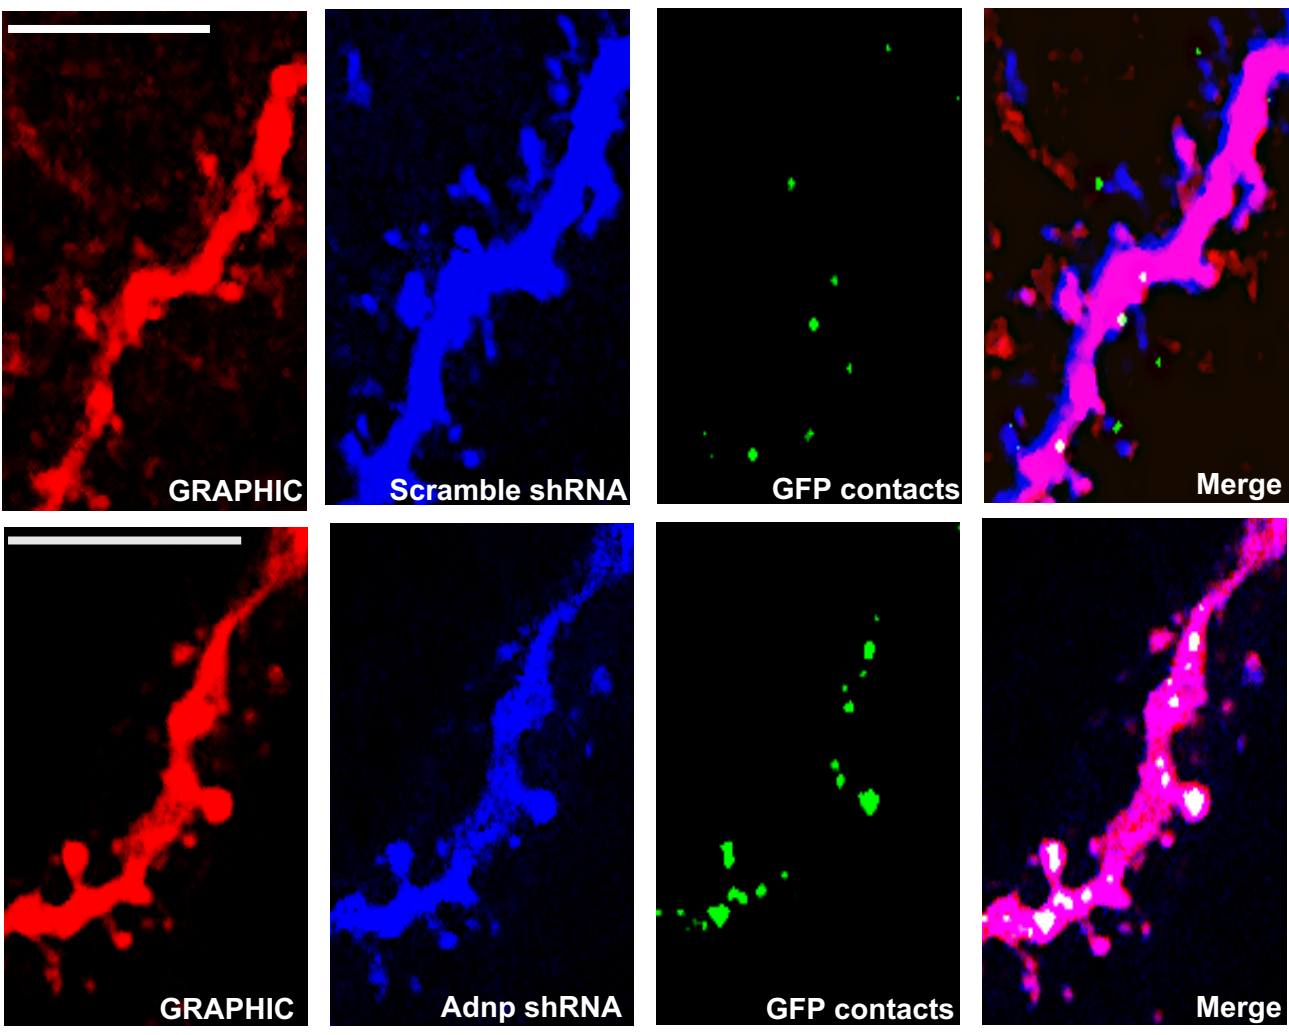

**D**

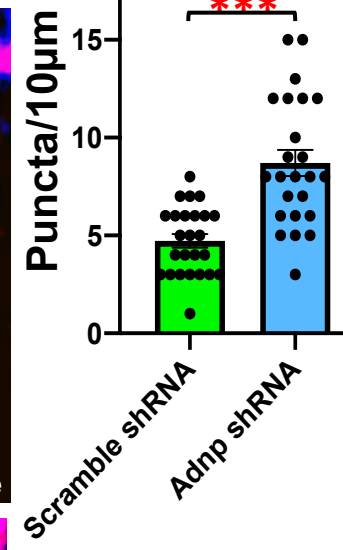

**E**

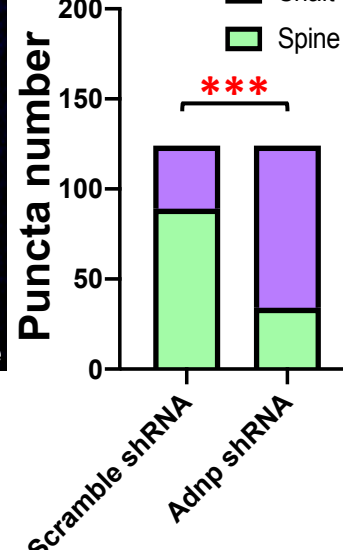

**A Immature Neurons**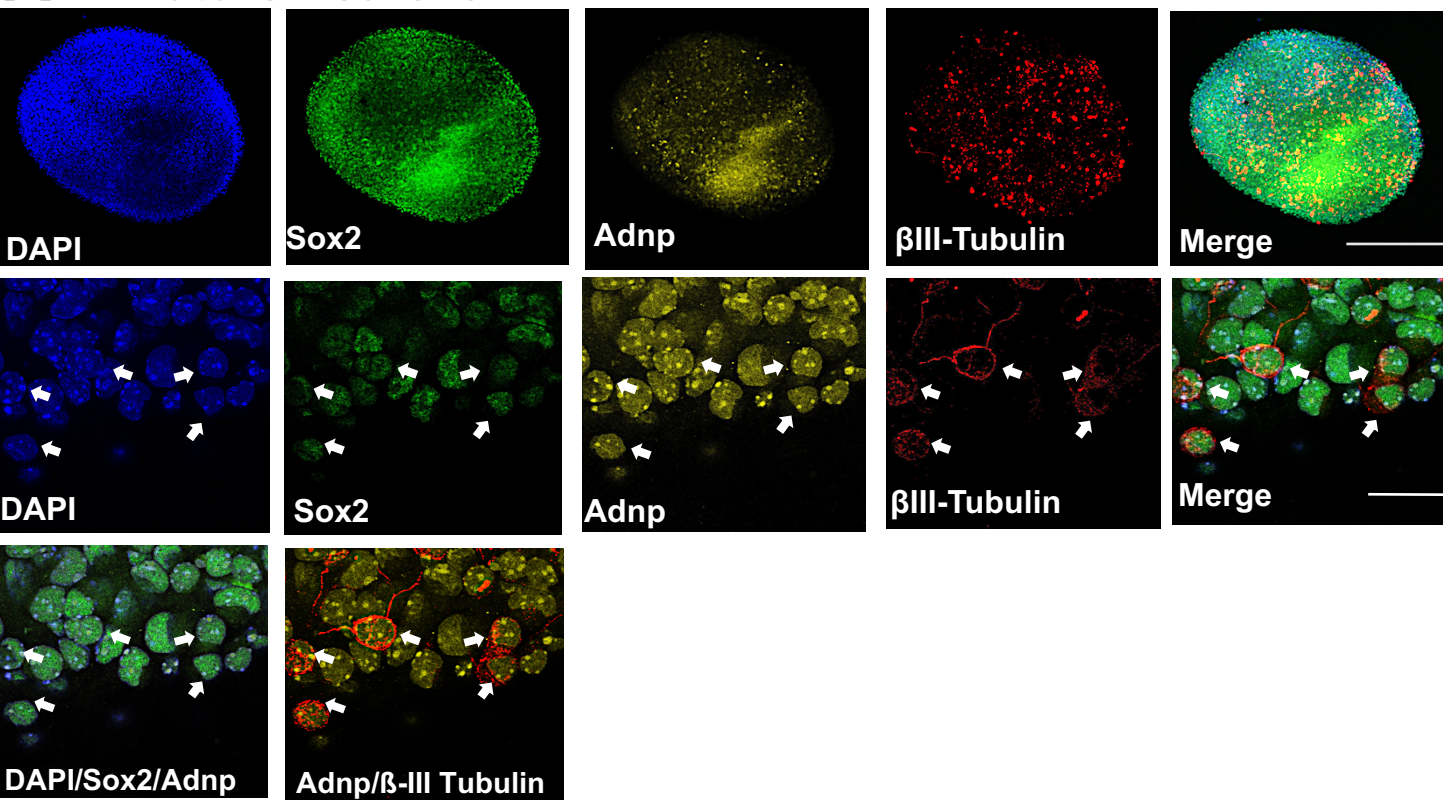**B Mature Neurons**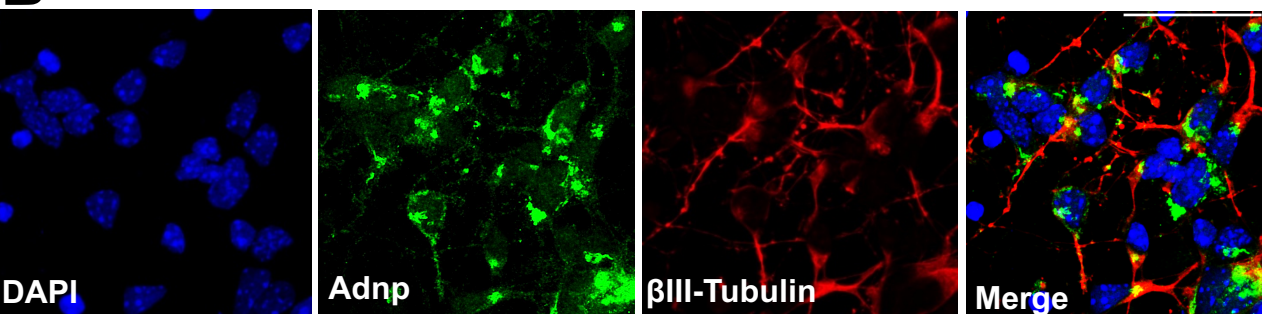**C Immature Neurons**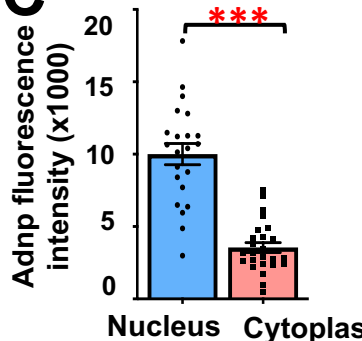**D Mature Neurons**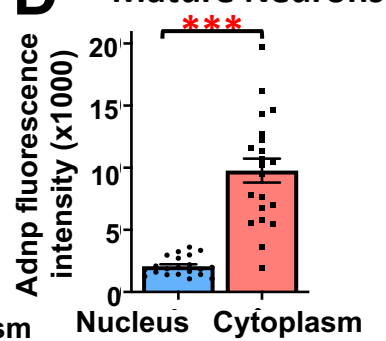**E**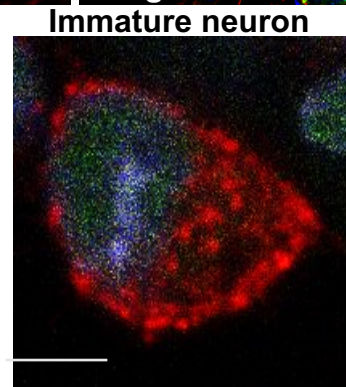**Mature Neuron**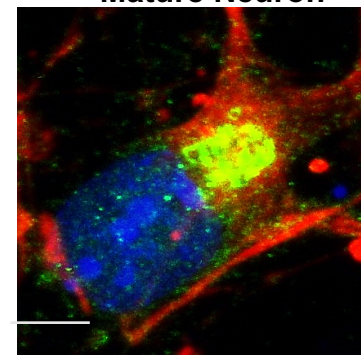**F**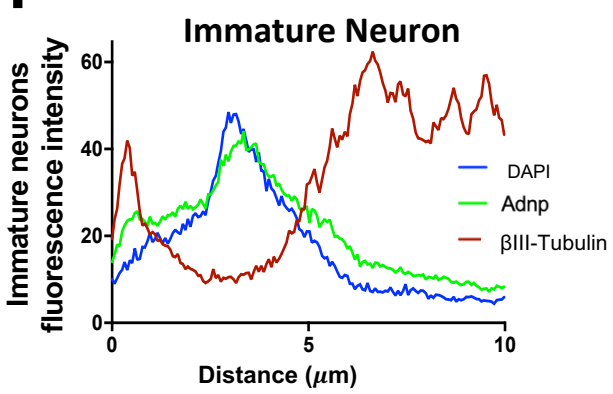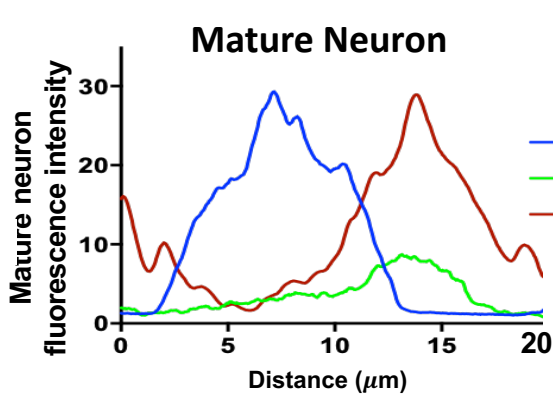**G**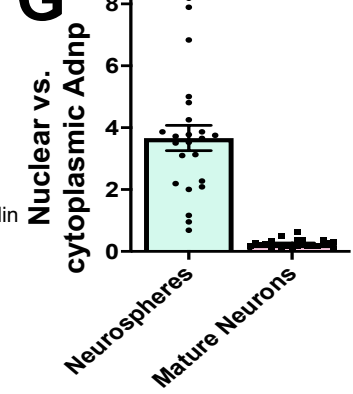

## Figure 11.

## A EYFP-Negative Control

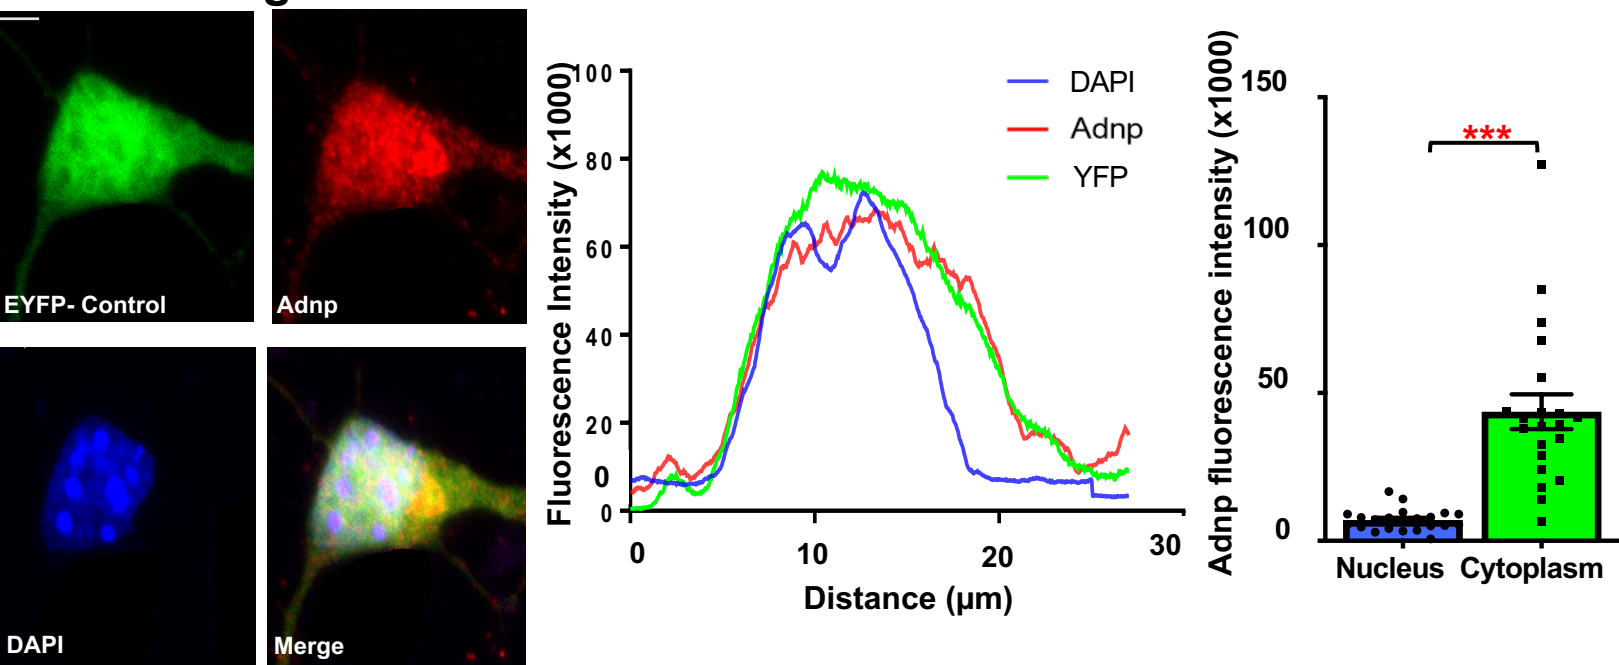

## B EYFP-Difopein

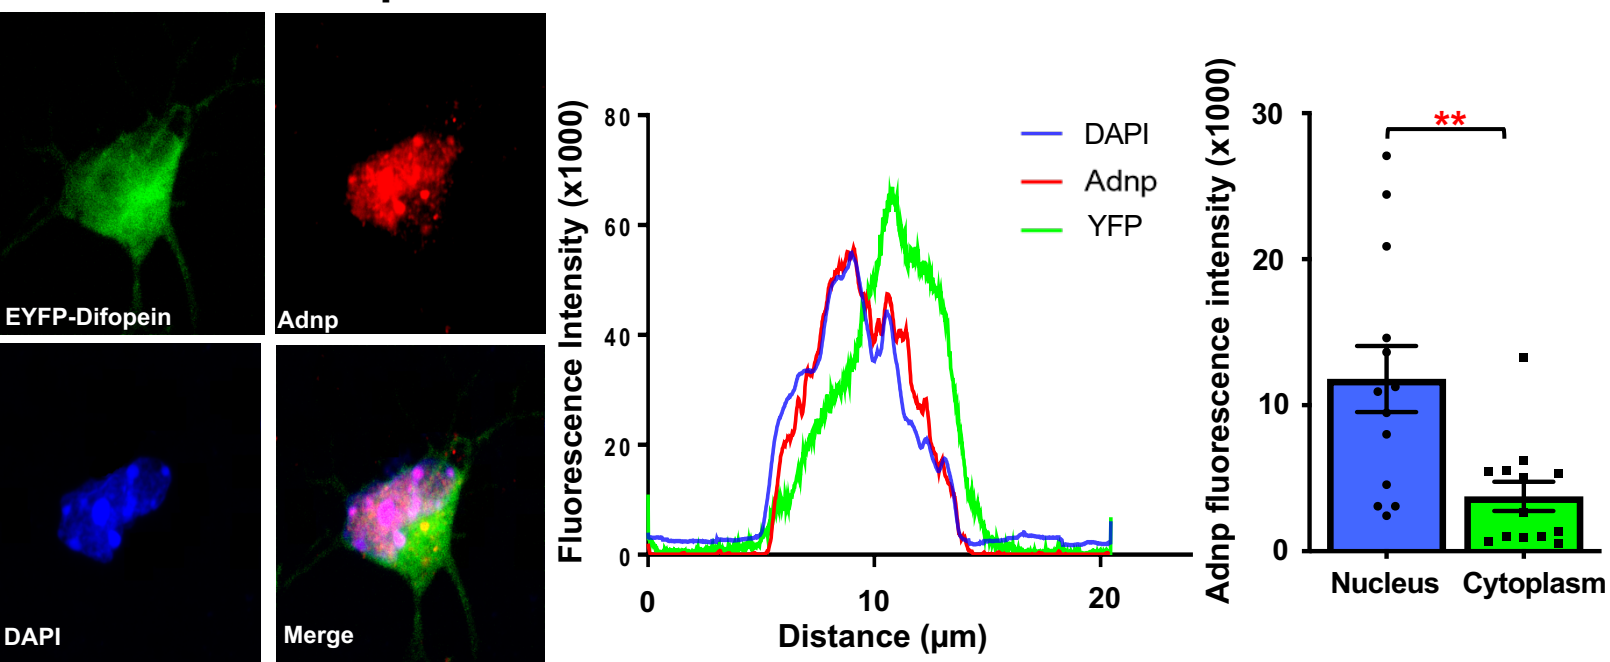

## C

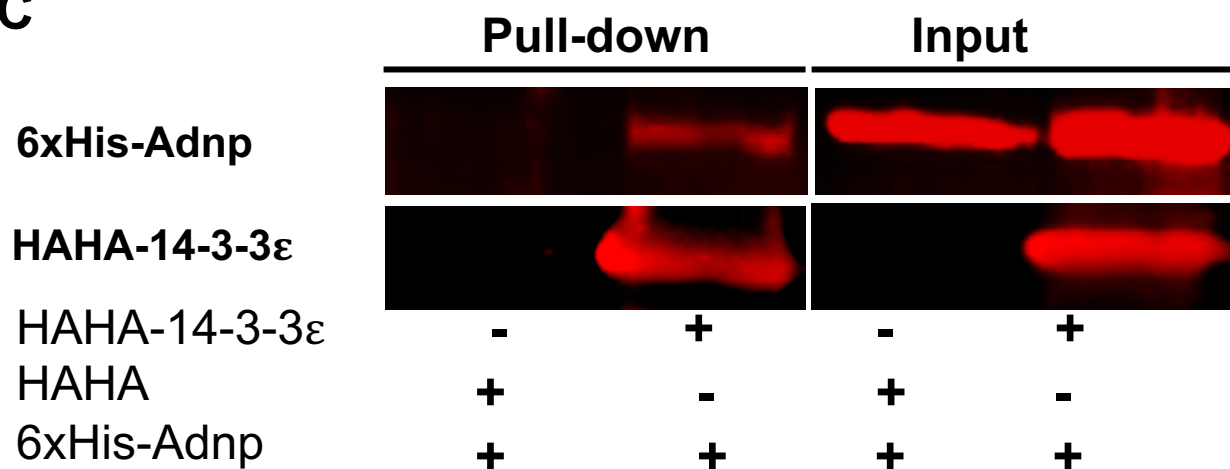



## Figure 12A.

## Wildtype

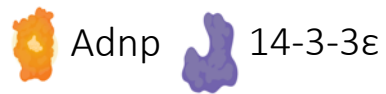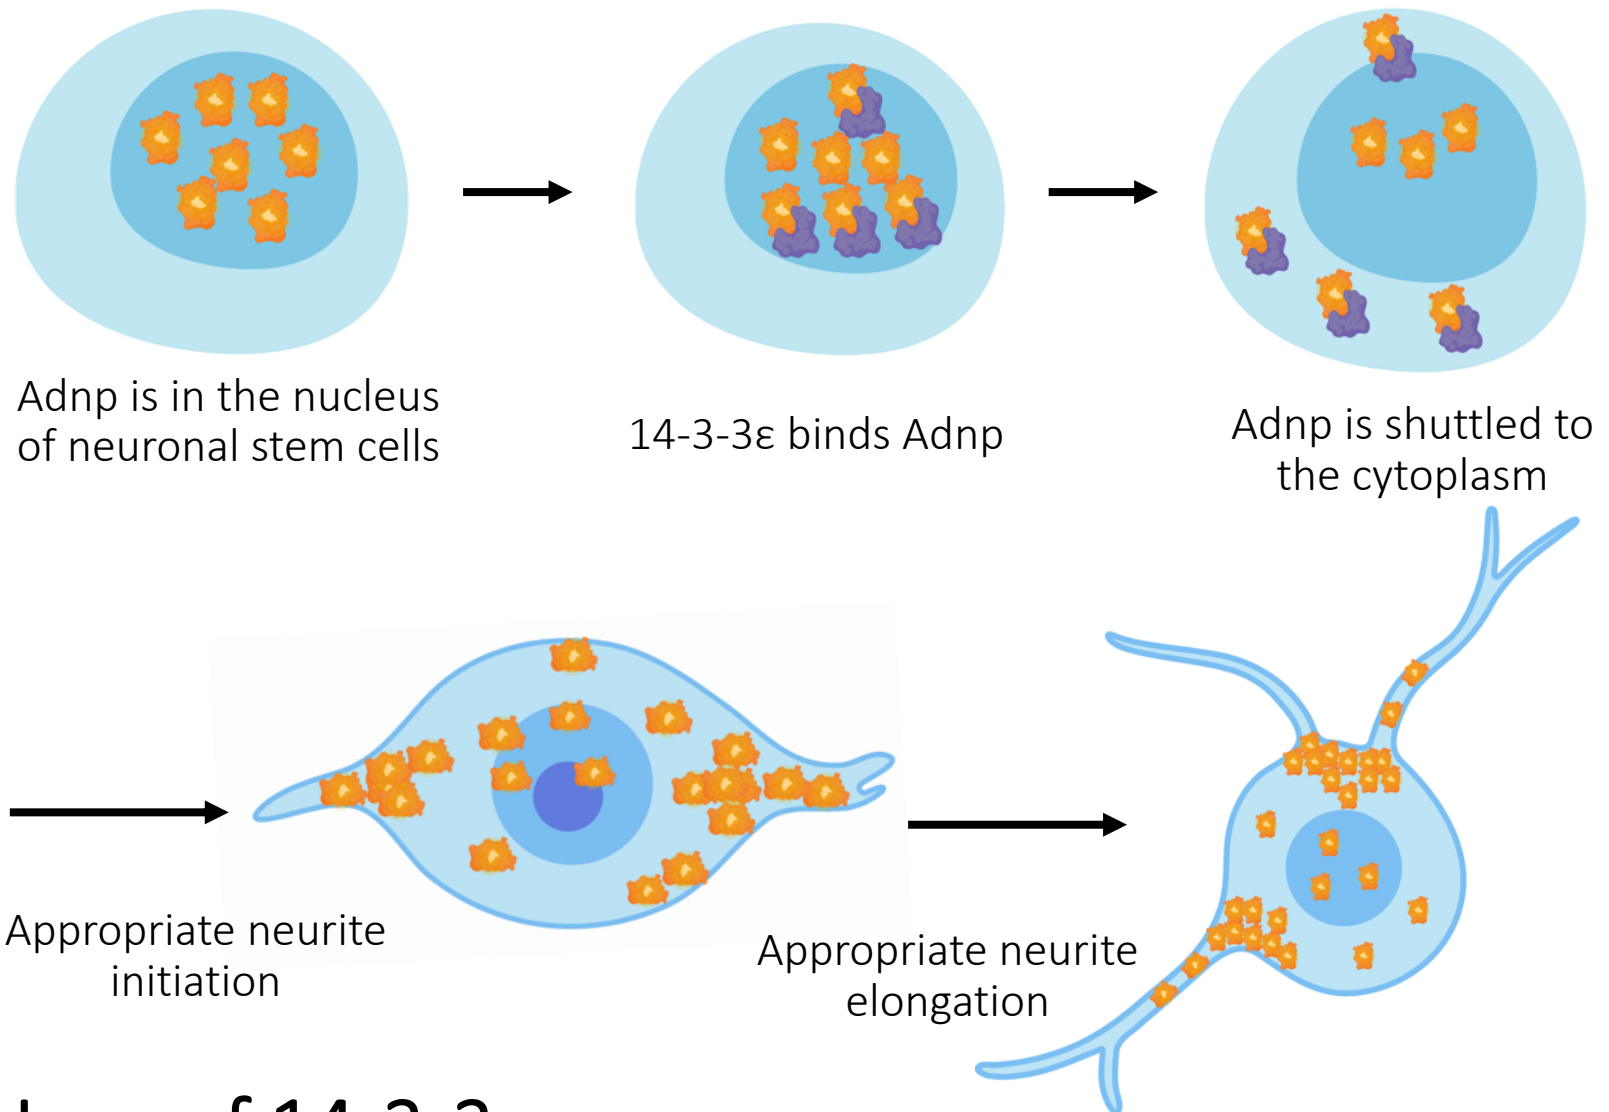

## Loss of 14-3-3ε

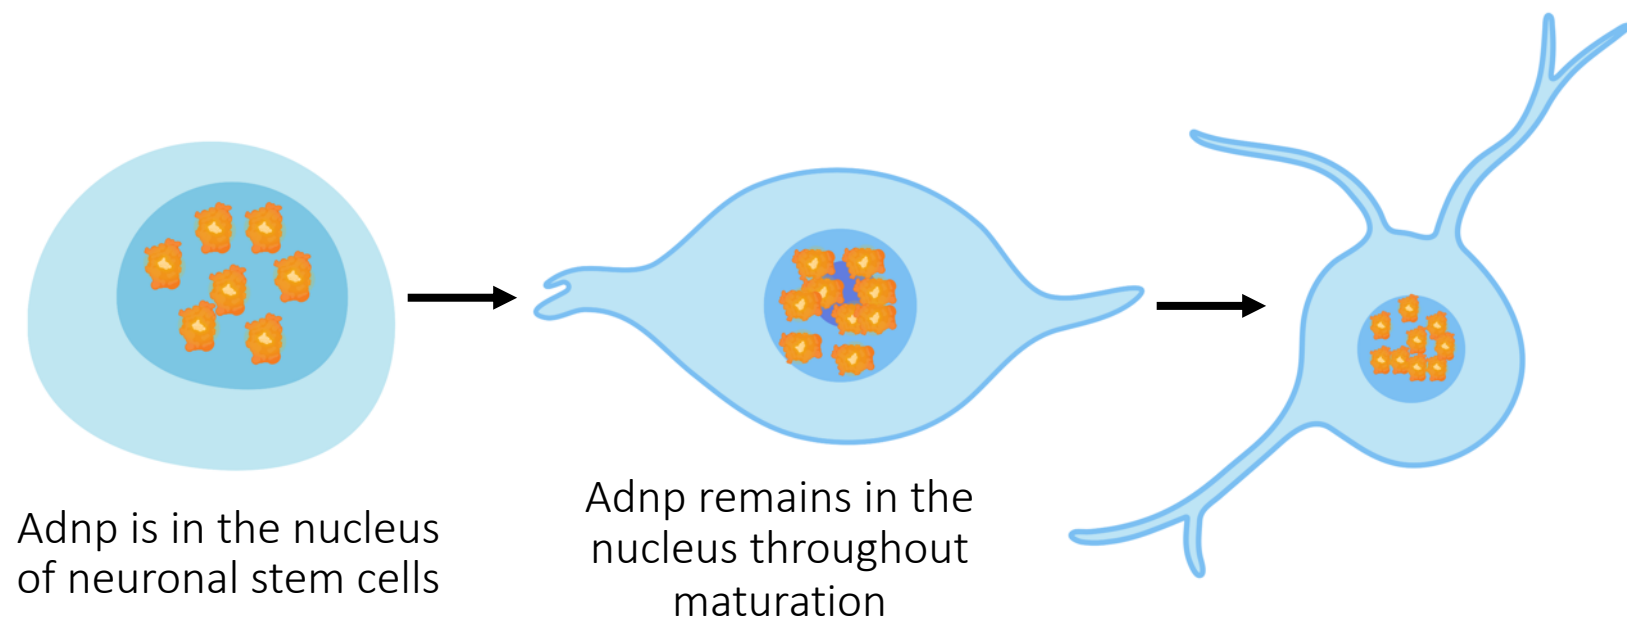

Figure 12B.

## Wildtype

Adnp

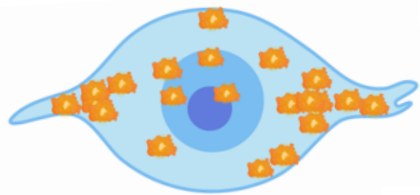

- neurite initiation

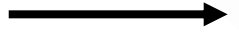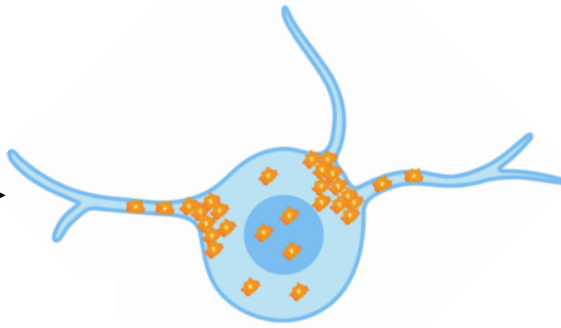

- neurite elongation

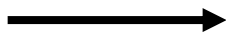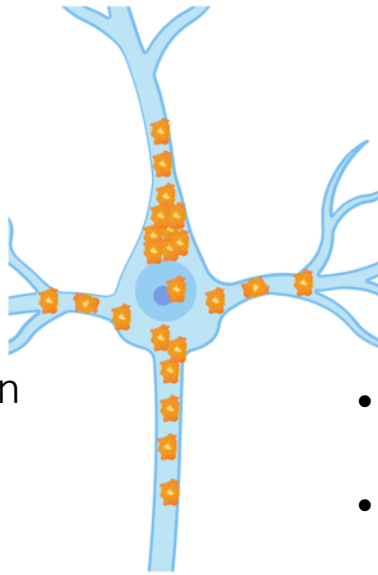

- axon formation
- dendrite formation

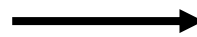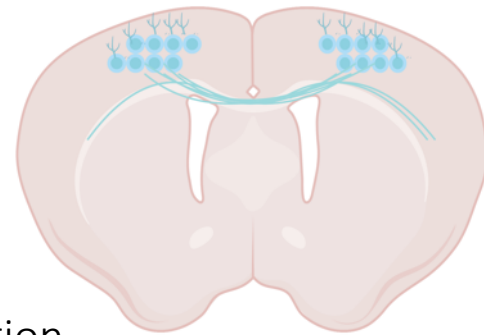

- cortical connectivity
- neuronal function

## Adnp KD

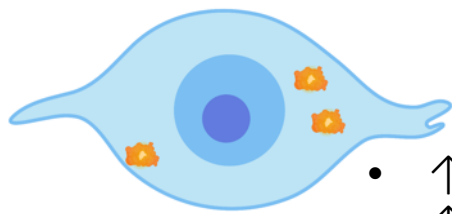

- ↑ neurite initiation
- ↑ neurite stabilization
- ↑ neurite elongation

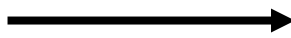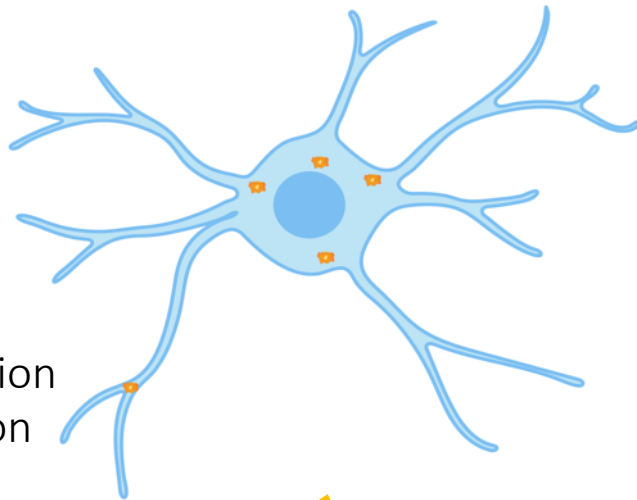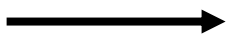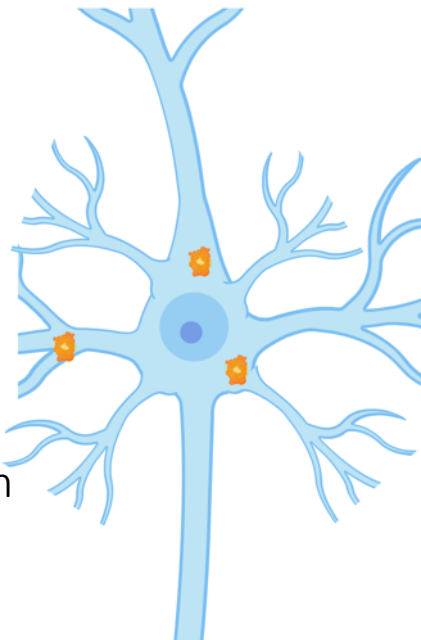

- ↑ basal dendrite number
- ↑ axon length

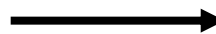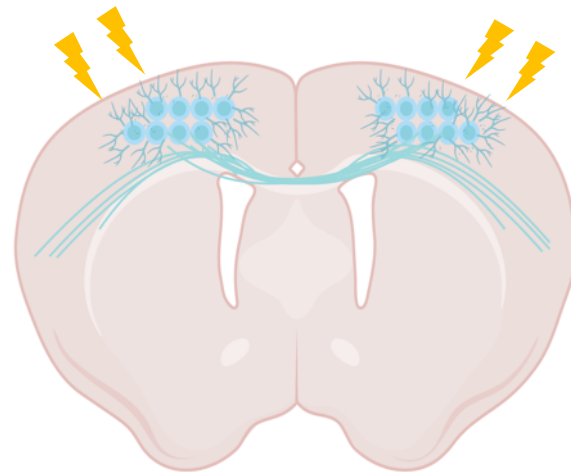

- ↑ interhemispheric cortical connectivity
- ↑ spontaneous excitability
